# Supplementary material for: K-Mer Analyses Reveal Different Evolutionary Histories of Alpha, Beta, and Gamma Papillomaviruses
Source: Int J Mol Sci. 2021 Sep 6;22(17):9657. doi: 10.3390/ijms22179657 (PMC8432194; doi:10.3390/ijms22179657)
Supplement: Supplementary file 1 [file ijms-22-09657-s001.zip › ijms-1362808-supplementary.xlsx]

## Sheet: Table S1
Table S1. Summary of papillomavirus genome groups used in this work.
Dataset	Total PVs	Alpha-HPV	Beta-HPV	Gamma-HPV	NHP-PV	Mu/Nu-HPV	NP-PV
Dataset 1	640	66	69	301	27	6	171
Dataset 2	228	65	52	97	14	-	-

## Sheet: TableS2
Table S2. Listing of the Papillomavirus complete genomes analyzed in this study.
Year	PV type	NCBI	Genus	Species	PV phylogeny cluster&	Dataset 1	Dataset 2	Complete genome length (bp)	Trimer order	RAxML order	K-mer cluster (E1-E2-L2-L1 genes)	K-mer cluster (E1-E2 genes)	K-mer cluster (L2-L1 genes)	Host binomial name	Host scientific name	Other name	Codon length (bp)	GC content (%)	CpG abundance (%)	CpG site	GC1s	GC2s	GC12s	GC3s	ENC	ENC*	pAA=TT	pAC=GT	pAG=CT	pAT	pCA=TG	pCC=GG	pCG	pGA=TC	pGC	pTA
2004	HPV7	X74463	Alphapapillomavirus	Alphapapillomavirus 8	Alpha-HPV-LR1	Yes	Yes	8027	1	10	Group 1	Group 1	Group 1	Homo sapiens	human being		6741	40.7457	2.1037	146	0.498386	0.435685	0.467036	0.297372	47.89	52.0894	1.00374	1.05156	0.969443	0.983408	1.30771	1.07652	0.525563	0.762318	1.20591	0.949614
2004	HPV91	AF419318	Alphapapillomavirus	Alphapapillomavirus 8	Alpha-HPV-LR1	Yes	Yes	7966	2	8	Group 1	Group 1	Group 1	Homo sapiens	human being	AE13,JC9813	6714	40.9982	1.6815	137	0.496066	0.424388	0.460227	0.276224	45.63	50.581	1.00702	1.05868	0.961651	0.984233	1.30431	1.13296	0.487797	0.723388	1.18923	0.97908
2004	HPV43	AJ620205	Alphapapillomavirus	Alphapapillomavirus 8	Alpha-HPV-LR1	Yes	Yes	7975	3	7	Group 1	Group 1	Group 1	Homo sapiens	human being		6738	41.1042	1.97044	133	0.503259	0.431099	0.467179	0.331471	49.52	54.3842	0.977186	1.0333	0.980718	1.01747	1.2901	1.1459	0.469148	0.760607	1.157	0.991733
2004	HPV6	X00203	Alphapapillomavirus	Alphapapillomavirus 10	Alpha-HPV-LR1	Yes	Yes	7996	4	1	Group 1	Group 1	Group 1	Homo sapiens	human being		6672	41.8685	1.74749	143	0.484424	0.405869	0.445147	0.216704	43.68	46.1445	1.02356	1.06985	0.891747	1.01001	1.31183	1.2296	0.489616	0.711187	1.07853	0.965476
2004	HPV11	M14119	Alphapapillomavirus	Alphapapillomavirus 10	Alpha-HPV-LR1	Yes	Yes	7933	5	2	Group 1	Group 1	Group 1	Homo sapiens	human being		6660	42.2432	2.05151	137	0.513993	0.42444	0.469216	0.324627	50.08	53.9954	0.991166	1.10967	0.923085	0.989234	1.31957	1.20838	0.462063	0.715636	1.03543	0.987429
2004	HPV44	U31788	Alphapapillomavirus	Alphapapillomavirus 10	Alpha-HPV-LR1	Yes	Yes	7833	6	3	Group 1	Group 1	Group 1	Homo sapiens	human being	HPV55,Xf	6681	42.3197	2.15625	132	0.484167	0.44011	0.462139	0.288665	47.57	51.5215	1.00325	1.07507	0.911184	1.01262	1.32703	1.23524	0.441028	0.697147	1.07584	0.983738
2004	HPV74	AF436130	Alphapapillomavirus	Alphapapillomavirus 10	Alpha-HPV-LR1	Yes	Yes	7887	7	4	Group 1	Group 1	Group 1	Homo sapiens	human being		6696	42.1805	2.05518	139	0.512407	0.430997	0.471702	0.29778	49.02	52.1598	1.02292	1.06019	0.955145	0.970113	1.2776	1.21552	0.46596	0.697427	1.11629	0.998751
2004	HPV42	M73236	Alphapapillomavirus	Alphapapillomavirus 1	Alpha-HPV-LR1	Yes	Yes	7917	8	11	Group 1	Group 1	Group 1	Homo sapiens	human being		6789	40.6053	1.96862	133	0.498614	0.430684	0.464649	0.299908	48.07	52.3	1.00195	1.09888	0.894211	1.00584	1.31817	1.21533	0.476217	0.717562	1.05627	0.975763
2004	HPV32	X74475	Alphapapillomavirus	Alphapapillomavirus 1	Alpha-HPV-LR1	Yes	Yes	7961	9	12	Group 1	Group 1	Group 1	Homo sapiens	human being		6783	41.935	1.62528	160	0.471469	0.427502	0.449486	0.217961	43.01	46.2209	1.0205	1.07849	0.914244	0.987366	1.29347	1.17727	0.536771	0.754825	1.05677	0.947101
2004	HPV70	U21941	Alphapapillomavirus	Alphapapillomavirus 7	Alpha-HPV-HR	Yes	Yes	7905	10	13	Group 1	Group 1	Group 1	Homo sapiens	human being	CP141-7	6732	41.2148	2.62222	142	0.54424	0.448848	0.496544	0.365899	51.05	56.4794	0.962018	1.0982	0.925765	1.02717	1.28653	1.20182	0.497416	0.698298	1.09291	1.05479
2004	HPV45	X74479	Alphapapillomavirus	Alphapapillomavirus 7	Alpha-HPV-HR	Yes	Yes	7858	11	18	Group 1	Group 1	Group 1	Homo sapiens	human being		6753	40.6882	1.95183	146	0.503637	0.435601	0.469619	0.327771	50.31	54.1908	0.982384	1.08076	0.900835	1.03334	1.26558	1.23644	0.523445	0.711121	1.07199	1.03672
2004	HPV18	AY262282	Alphapapillomavirus	Alphapapillomavirus 7	Alpha-HPV-HR	Yes	Yes	7857	12	19	Group 1	Group 1	Group 1	Homo sapiens	human being		6762	41.4307	2.34513	159	0.500458	0.442255	0.471357	0.294684	48.5	51.9483	1.01213	1.08922	0.900796	0.997686	1.28859	1.18578	0.54843	0.723311	1.08306	0.982151
2004	HPV30	X74474	Alphapapillomavirus	Alphapapillomavirus 6	Alpha-HPV-HR	Yes	Yes	7852	13	23	Group 1	Group 1	Group 1	Homo sapiens	human being		6693	41.3649	1.61871	137	0.466884	0.434235	0.45056	0.232276	43.97	47.2877	1.00377	1.12674	0.903109	0.979961	1.33808	1.18089	0.478986	0.684397	1.09083	0.985192
2004	HPV53	X74482	Alphapapillomavirus	Alphapapillomavirus 6	Alpha-HPV-HR	Yes	Yes	7859	14	24	Group 1	Group 1	Group 1	Homo sapiens	human being	W13A	6723	40.8693	1.88366	130	0.526142	0.440415	0.483278	0.313707	49.09	53.2634	0.984323	1.08775	0.925693	1.01145	1.30137	1.20965	0.463835	0.737853	1.04541	0.992686
2004	HPV51	M62877	Alphapapillomavirus	Alphapapillomavirus 5	Alpha-HPV-HR	Yes	Yes	7808	15	26	Group 1	Group 1	Group 1	Homo sapiens	human being		6648	39.784	1.78811	124	0.484961	0.425266	0.455113	0.260528	46.03	49.4737	1.00369	1.07832	0.892964	1.0192	1.31252	1.21888	0.47205	0.716375	1.09637	0.980959
2004	HPV82	AB027021	Alphapapillomavirus	Alphapapillomavirus 5	Alpha-HPV-HR	Yes	Yes	7871	16	25	Group 1	Group 1	Group 1	Homo sapiens	human being	AE2,IS39,MM4,W13B	6642	40.8408	2.89727	129	0.562932	0.447672	0.505302	0.40249	53.15	58.2563	1.02022	1.09749	0.894894	0.989757	1.315	1.23147	0.465699	0.6836	1.08663	0.984584
2004	HPV68	DQ080079	Alphapapillomavirus	Alphapapillomavirus 7	Alpha-HPV-HR	Yes	Yes	7822	17	14	Group 1	Group 1	Group 1	Homo sapiens	human being	ME180	6741	40.7901	1.81791	149	0.477357	0.43854	0.457948	0.266636	46.51	49.9191	0.965571	1.15534	0.864974	1.02648	1.32687	1.19155	0.531926	0.683648	1.046	1.03328
2004	HPV39	M62849	Alphapapillomavirus	Alphapapillomavirus 7	Alpha-HPV-HR	Yes	Yes	7833	18	15	Group 1	Group 1	Group 1	Homo sapiens	human being		6762	40.944	1.72212	140	0.48574	0.418289	0.452014	0.248529	45.45	48.5747	0.956608	1.11992	0.890572	1.04226	1.31146	1.2159	0.493916	0.713678	1.02664	1.03204
2004	HPV54	U37488	Alphapapillomavirus	Alphapapillomavirus 13	Alpha-HPV-LR1	Yes	Yes	7759	19	51	Group 1	Group 1	Group 1	Homo sapiens	human being	AE9,Xc	6618	42.7667	1.74419	125	0.480297	0.411683	0.44599	0.261938	45.16	49.5481	0.957805	1.04292	0.951806	1.05151	1.28919	1.26553	0.412991	0.666141	1.12664	1.08113
2004	HPV73	X94165	Alphapapillomavirus	Alphapapillomavirus 11	Alpha-HPV-HR	Yes	Yes	7700	20	30	Group 1	Group 1	Group 1	Homo sapiens	human being	MM9,Pap238A,Xh	6666	37.1335	2.0703	100	0.508121	0.426914	0.467517	0.326682	50.5	54.1258	0.981204	1.18435	0.919026	0.964132	1.30612	1.18483	0.437073	0.712662	0.996526	1.01447
2004	HPV34	X74476	Alphapapillomavirus	Alphapapillomavirus 11	Alpha-HPV-HR	Yes	Yes	7723	21	31	Group 1	Group 1	Group 1	Homo sapiens	human being	HPV64,NMCP049,Nm6	6630	39.0343	1.55595	113	0.467442	0.424186	0.445814	0.224651	43.75	46.7548	0.970481	1.13649	0.900092	1.01351	1.32991	1.19454	0.44979	0.704145	1.06278	1.01514
2004	HPV56	X74483	Alphapapillomavirus	Alphapapillomavirus 6	Alpha-HPV-HR	Yes	Yes	7845	22	21	Group 1	Group 1	Group 1	Homo sapiens	human being		6690	38.7448	3.81634	117	0.571695	0.449255	0.510475	0.520019	54.97	60.4273	0.989282	1.11179	0.925866	0.996484	1.28264	1.20559	0.469063	0.718583	1.07043	1.01895
2004	HPV66	U31794	Alphapapillomavirus	Alphapapillomavirus 6	Alpha-HPV-HR	Yes	Yes	7824	23	22	Group 1	Group 1	Group 1	Homo sapiens	human being	AE3,MM6,Pap88,L1NM8211	6678	39.1876	1.84435	114	0.475724	0.43324	0.454482	0.261438	45.83	49.4737	0.977272	1.08164	0.913695	1.03345	1.27717	1.26035	0.447455	0.721932	1.05191	1.0302
2004	HPV33	M12732	Alphapapillomavirus	Alphapapillomavirus 9	Alpha-HPV-HR	Yes	Yes	7909	24	37	Group 1	Group 1	Group 1	Homo sapiens	human being		6627	37.4718	1.69976	108	0.481238	0.424953	0.453096	0.257036	44.38	49.1751	1.03539	1.09445	0.928737	0.95631	1.29869	1.1575	0.465016	0.750183	1.10657	0.940811
2004	HPV16	NC_001526	Alphapapillomavirus	Alphapapillomavirus 9	Alpha-HPV-HR	Yes	Yes	7906	25	34	Group 1	Group 1	Group 1	Homo sapiens	human being		6723	37.3832	1.36478	92	0.46547	0.425875	0.445672	0.222836	43.66	46.6023	0.964036	1.13439	0.944267	0.994819	1.3055	1.19101	0.391879	0.737669	1.02655	1.01615
2004	HPV35	X74477	Alphapapillomavirus	Alphapapillomavirus 9	Alpha-HPV-HR	Yes	Yes	7879	26	32	Group 1	Group 1	Group 1	Homo sapiens	human being		6666	37.4476	2.40464	104	0.520513	0.432051	0.476282	0.330769	51.82	54.3842	0.968908	1.10622	0.95166	1.00332	1.27101	1.18423	0.44676	0.745999	1.06965	1.02798
2004	HPV31	J04353	Alphapapillomavirus	Alphapapillomavirus 9	Alpha-HPV-HR	Yes	Yes	7912	27	33	Group 1	Group 1	Group 1	Homo sapiens	human being		6654	38.0096	2.3526	108	0.507113	0.445617	0.476365	0.299679	48.01	52.3	1.00705	1.13099	0.917258	0.967543	1.32055	1.16399	0.450862	0.732789	1.06453	0.964407
2004	HPV58	D90400	Alphapapillomavirus	Alphapapillomavirus 9	Alpha-HPV-HR	Yes	Yes	7824	28	36	Group 1	Group 1	Group 1	Homo sapiens	human being	CIN46,Pap251	6657	38.8614	1.90687	125	0.483915	0.429688	0.456801	0.261029	46.75	49.4737	1.00919	1.08453	0.921854	0.992716	1.30018	1.15469	0.498399	0.754129	1.10445	0.962046
2010	HPV97	DQ080080	Alphapapillomavirus	Alphapapillomavirus 7	Alpha-HPV-HR	Yes	Yes	7843	29	17	Group 1	Group 1	Group 1	Homo sapiens	human being		6738	38.4399	2.28911	130	0.505893	0.435181	0.470537	0.298996	48.66	52.23	0.995202	1.12215	0.940755	0.969574	1.25976	1.15799	0.523005	0.736841	1.07015	1.01036
2004	HPV85	AF131950	Alphapapillomavirus	Alphapapillomavirus 7	Alpha-HPV-HR	Yes	Yes	7812	30	20	Group 1	Group 1	Group 1	Homo sapiens	human being	AE5,HLT7474-S	6780	38.3348	2.79132	117	0.553456	0.447465	0.500461	0.410138	53.11	58.5898	0.947774	1.11512	0.928441	1.03123	1.2931	1.17517	0.470239	0.74798	1.04899	1.03279
2004	HPV52	X74481	Alphapapillomavirus	Alphapapillomavirus 9	Alpha-HPV-HR	Yes	Yes	7942	31	35	Group 1	Group 1	Group 1	Homo sapiens	human being	Xa	6693	39.2341	1.9285	120	0.493536	0.420129	0.456833	0.306094	48.87	52.7169	0.999179	1.09252	0.926269	0.996905	1.27628	1.22164	0.46732	0.732515	1.05537	1.00342
2004	HPV67	D21208	Alphapapillomavirus	Alphapapillomavirus 9	Alpha-HPV-HR	Yes	Yes	7801	32	38	Group 1	Group 1	Group 1	Homo sapiens	human being	MM2	6651	39.1663	2.20447	123	0.49377	0.433779	0.463775	0.291186	48.09	51.6643	1.03565	1.0963	0.922606	0.958461	1.28636	1.1945	0.482049	0.737582	1.06599	0.955196
2004	HPV26	X74472	Alphapapillomavirus	Alphapapillomavirus 5	Alpha-HPV-HR	Yes	Yes	7855	33	27	Group 1	Group 1	Group 1	Homo sapiens	human being		6726	39.6204	3.30196	132	0.55918	0.44781	0.503495	0.485089	56.31	60.4328	0.985091	1.0847	0.891317	1.03664	1.28057	1.23931	0.499892	0.69793	1.09446	1.035
2004	HPV69	AB027020	Alphapapillomavirus	Alphapapillomavirus 5	Alpha-HPV-HR	Yes	Yes	7700	34	28	Group 1	Group 1	Group 1	Homo sapiens	human being	MM5	6693	39.6215	2.16008	122	0.505525	0.429098	0.467311	0.282228	46.79	51.0176	0.996511	1.10871	0.926835	0.984043	1.29558	1.19787	0.465171	0.722533	1.06379	0.995542
2004	HPV59	X77858	Alphapapillomavirus	Alphapapillomavirus 7	Alpha-HPV-HR	Yes	Yes	7896	35	16	Group 1	Group 1	Group 1	Homo sapiens	human being		6747	39.4235	2.13752	129	0.514459	0.428638	0.471549	0.309701	49.16	52.9916	1.01836	1.09682	0.948269	0.955852	1.28004	1.15843	0.492099	0.748959	1.07957	0.965556
2015	HPV177	KR816168	Alphapapillomavirus	Alphapapillomavirus 11	Alpha-HPV-HR	Yes	Yes	7933	36	29	Group 1	Group 1	Group 1	Homo sapiens	human being	ACS409	6744	39.6776	1.59716	108	0.481141	0.436523	0.458832	0.267709	46.59	49.993	0.984333	1.14554	0.93917	0.963139	1.3099	1.21554	0.406866	0.7155	0.998329	1.00232
2004	PpPV1	X62844	Alphapapillomavirus	Alphapapillomavirus 10	NHP-PV	Yes	No	7902	37	6	Group 1	Group 1	Group 1	Pan paniscus	pygmy chimpanzee	PCPV	6714	39.1563	1.81224	122	0.485886	0.420639	0.453262	0.26099	45.85	49.4737	1.02401	1.0824	0.955207	0.956647	1.29564	1.13742	0.47511	0.723264	1.1683	0.96794
2004	HPV13	X62843	Alphapapillomavirus	Alphapapillomavirus 10	Alpha-HPV-LR1	Yes	Yes	7880	38	5	Group 1	Group 1	Group 1	Homo sapiens	human being		6708	40.3211	1.72465	116	0.494216	0.428505	0.46136	0.280888	47.19	50.9451	1.02191	1.04048	0.960154	0.981334	1.30121	1.18883	0.425659	0.746374	1.1302	0.949461
2018#	HPVw02c24a	MF588696	Gammapapillomavirus	Gammapapillomavirus 6	Gamma-HPV	Yes	No	7324	39	230	Group 1	Group 1	Group 1	Homo sapiens	human being		6462	41.8712	2.0071	130	0.534004	0.434866	0.484435	0.284004	47.96	51.1622	1.01894	0.994639	1.0365	0.959424	1.21919	1.18709	0.462651	0.806875	1.09969	0.963086
2010	HPV103	DQ080078	Gammapapillomavirus	Gammapapillomavirus 6	Gamma-HPV	Yes	Yes	7263	40	231	Group 1	Group 1	Group 1	Homo sapiens	human being		6456	42.0646	1.86988	121	0.533525	0.432471	0.482998	0.293103	48.91	51.8066	1.02026	0.980341	1.05644	0.956475	1.22638	1.18777	0.42602	0.815472	1.10202	0.952774
2018#	HPV214	MF509819	Gammapapillomavirus	Gammapapillomavirus 6	Gamma-HPV	Yes	Yes	7357	41	228	Group 1	Group 1	Group 1	Homo sapiens	human being	HPVw03c65	6510	42.4981	1.71623	141	0.495404	0.397978	0.446691	0.263327	46.71	49.6225	1.04752	1.00719	1.01096	0.94114	1.23422	1.18968	0.484447	0.798982	1.08571	0.92998
2018#	HPV226	MG813996	Gammapapillomavirus	Gammapapillomavirus 6	Gamma-HPV	Yes	Yes	7313	42	233	Group 1	Group 1	Group 1	Homo sapiens	human being	HPV16031680A,HPVmSK068	6513	43.076	2.02283	142	0.515192	0.408847	0.46202	0.273012	48.23	50.3612	1.00884	1.00831	1.00831	0.980368	1.22321	1.22513	0.47098	0.793401	1.04146	0.980368
2010	HPV108	FM212639	Gammapapillomavirus	Gammapapillomavirus 6	Gamma-HPV	Yes	Yes	7149	43	229	Group 1	Group 1	Group 1	Homo sapiens	human being		6336	43.0483	2.23587	142	0.533691	0.437012	0.485352	0.317871	49.97	53.5323	1.04081	0.99932	1.01088	0.953979	1.22924	1.19972	0.485927	0.795089	1.07794	0.942298
2010	HPV101	DQ080081	Gammapapillomavirus	Gammapapillomavirus 6	Gamma-HPV	Yes	Yes	7259	44	232	Group 1	Group 1	Group 1	Homo sapiens	human being		6519	43.618	2.29568	150	0.548081	0.44055	0.494315	0.317385	50.16	53.4654	1.02354	0.947173	0.987002	1.02883	1.21851	1.2517	0.485992	0.795327	1.08862	0.967058
2017	MrPV1	JQ814847	Treisiotapapillomavirus	Treisiotapapillomavirus 1	NPA-PV	Yes	No	7339	45	93	Group 1	Group 1	Group 2	Myotis ricketti	Rickett's Big-Footed Bat		6423	42.9792	2.29885	148	0.513291	0.432093	0.472692	0.341711	50.13	55.0762	1.03476	0.867049	0.979867	1.08788	1.2093	1.25123	0.503367	0.924091	1.03734	0.870307
2018#	EdPV2	MH376689	pending	pending	NPA-PV	Yes	No	8809	46	217	Group 1	Group 1	Group 2	Erethizon dorsatum	North American porcupine		6699	42.8018	2.45645	165	0.538745	0.407288	0.473017	0.333487	51.73	54.5121	1.03479	0.910945	1.16148	0.912676	1.1177	1.09057	0.544273	0.932836	1.13473	0.929104
2004	HPV19	X74470	Betapapillomavirus	Betapapillomavirus 1	Beta-HPV	Yes	Yes	7685	47	125	Group 1	Group 1	Group 1	Homo sapiens	human being		7206	40.9468	2.06257	149	0.505358	0.431204	0.468281	0.288041	49.29	51.4499	1.06144	0.944589	1.07969	0.926005	1.2148	1.08322	0.494858	0.919399	1.11924	0.849371
2004	HPV14	X74467	Betapapillomavirus	Betapapillomavirus 1	Beta-HPV	Yes	Yes	7439	48	123	Group 1	Group 1	Group 1	Homo sapiens	human being		7227	41.4079	1.97378	143	0.505767	0.433148	0.469457	0.300726	49.94	52.3699	1.04775	0.928452	1.09002	0.94363	1.22201	1.09802	0.462684	0.970551	1.04832	0.819213
2004	HPV21	U31779	Betapapillomavirus	Betapapillomavirus 1	Beta-HPV	Yes	Yes	7779	49	122	Group 1	Group 1	Group 1	Homo sapiens	human being		7239	41.4359	1.44144	165	0.478099	0.398416	0.438257	0.255825	45.89	49.1003	1.05023	0.906291	1.08232	0.962492	1.19022	1.08509	0.531464	0.988062	1.06615	0.826839
2004	HPV20	U31778	Betapapillomavirus	Betapapillomavirus 1	Beta-HPV	Yes	Yes	7757	50	121	Group 1	Group 1	Group 1	Homo sapiens	human being		7209	41.6079	2.00637	145	0.510056	0.432606	0.471331	0.302525	49.31	52.5092	1.05675	0.891875	1.09804	0.95539	1.2165	1.09499	0.465572	0.967052	1.10774	0.816573
2004	HPV47	M32305	Betapapillomavirus	Betapapillomavirus 1	Beta-HPV	Yes	Yes	7726	51	126	Group 1	Group 1	Group 1	Homo sapiens	human being		7206	42.345	1.48478	141	0.461857	0.407169	0.434513	0.223805	43.6	46.6785	1.06274	0.94122	1.08637	0.92084	1.22472	1.14102	0.43795	0.959364	1.00014	0.805317
2004	HPV25	X74471	Betapapillomavirus	Betapapillomavirus 1	Beta-HPV	Yes	Yes	7713	52	124	Group 1	Group 1	Group 1	Homo sapiens	human being		7218	42.2471	1.9573	172	0.477681	0.429821	0.453751	0.274735	47.01	50.5078	1.07728	0.914185	1.00141	0.988561	1.25403	1.11809	0.534804	0.936842	1.08826	0.785523
2010	HPV99	FM955838	Betapapillomavirus	Betapapillomavirus 1	Beta-HPV	Yes	Yes	7698	53	134	Group 1	Group 1	Group 1	Homo sapiens	human being	GA3-1	7197	42.5225	1.74815	178	0.487109	0.403315	0.445212	0.237109	45.07	47.6675	1.09415	0.930017	1.01735	0.948845	1.24191	1.10379	0.548796	0.962908	1.04518	0.756716
2004	HPV5	M17463	Betapapillomavirus	Betapapillomavirus 1	Beta-HPV	Yes	Yes	7746	54	127	Group 1	Group 1	Group 1	Homo sapiens	human being		7242	42.8099	1.40553	175	0.472337	0.389575	0.430956	0.232739	43.8	47.3637	1.06884	0.901282	1.04081	0.979557	1.18821	1.16795	0.528565	0.965418	1.01484	0.820252
2004	HPV36	U31785	Betapapillomavirus	Betapapillomavirus 1	Beta-HPV	Yes	Yes	7722	55	129	Group 1	Group 1	Group 1	Homo sapiens	human being		7218	42.869	2.08955	174	0.516314	0.41843	0.467372	0.283069	48.25	51.0899	1.07122	0.937815	1.03938	0.948512	1.21656	1.13551	0.527813	0.961515	1.00709	0.797226
2004	HPV12	X74466	Betapapillomavirus	Betapapillomavirus 1	Beta-HPV	Yes	Yes	7673	56	131	Group 1	Group 1	Group 1	Homo sapiens	human being		7179	42.7122	2.26483	163	0.517389	0.424646	0.471018	0.337055	52.31	54.7651	1.05251	0.92219	1.07551	0.95585	1.22429	1.10132	0.498823	0.959668	1.06191	0.815887
2018#	HPV206	U85660	Betapapillomavirus	Betapapillomavirus 1	Beta-HPV	Yes	Yes	7731	57	132	Group 1	Group 1	Group 1	Homo sapiens	human being	HPVmSK144,FA22, RTRX7	7275	42.9727	1.85344	164	0.507285	0.410155	0.45872	0.28521	48.31	51.2343	1.06334	0.93888	1.06981	0.934835	1.24326	1.09744	0.489824	0.95119	1.05432	0.794016
2010	HPV105	FM955841	Betapapillomavirus	Betapapillomavirus 1	Beta-HPV	Yes	Yes	7667	58	130	Group 1	Group 1	Group 1	Homo sapiens	human being	FA37,DL294	7185	43.3292	2.41566	174	0.52878	0.422251	0.475515	0.347079	53.41	55.3811	1.07033	0.917059	1.03805	0.968216	1.22802	1.13732	0.516653	0.960029	1.02737	0.789174
2004	HPV8	M12737	Betapapillomavirus	Betapapillomavirus 1	Beta-HPV	Yes	Yes	7654	59	135	Group 1	Group 1	Group 1	Homo sapiens	human being		7173	43.3737	1.79181	160	0.506837	0.423908	0.465373	0.257168	45.75	49.1751	1.05125	0.955737	1.05992	0.941534	1.26035	1.10879	0.475428	0.937619	1.03406	0.800304
2013	HPV143	HM999995	Betapapillomavirus	Betapapillomavirus 1	Beta-HPV	Yes	Yes	7715	60	128	Group 1	Group 1	Group 1	Homo sapiens	human being	FAIVSM10,CL3220	7221	43.3347	2.51416	182	0.525619	0.436379	0.480999	0.335611	52.56	54.7022	1.0635	0.909096	1.05874	0.967045	1.21175	1.11078	0.539493	0.967602	1.05824	0.804137
2018#	HPVmSK219	MH777358	Betapapillomavirus	Betapapillomavirus 1	Beta-HPV	Yes	No	7804	61	133	Group 1	Group 1	Group 1	Homo sapiens	human being		7200	43.6409	1.81895	171	0.496293	0.43044	0.463367	0.276494	47.53	50.581	1.08257	0.921528	1.06573	0.93077	1.22345	1.12898	0.50125	0.9373	1.06113	0.7958
2010	MfPV1	EF028290	Betapapillomavirus	Betapapillomavirus 1	NHP-PV	Yes	No	7588	62	120	Group 1	Group 1	Group 2	Macaca fascicularis	Cynomolgus macaque		7131	43.9502	2.51783	180	0.533564	0.440017	0.486791	0.343006	52.56	55.1377	1.06861	0.866511	1.06866	0.985714	1.17201	1.17169	0.524715	0.94033	1.0815	0.846175
2018#	HPVHIVGc36	MF588677	Betapapillomavirus	Betapapillomavirus 1	Beta-HPV	Yes	No	7550	63	119	Group 1	Group 1	Group 1	Homo sapiens	human being	HPVmSK129,FA25	7059	39.6778	1.52525	130	0.474553	0.401651	0.438102	0.223292	43.28	46.6023	1.06479	0.929246	1.08865	0.929235	1.16185	1.15244	0.471143	0.950499	1.04014	0.86666
2015	HPV196	KR816183	Betapapillomavirus	Betapapillomavirus 1	Beta-HPV	Yes	Yes	7500	64	116	Group 1	Group 1	Group 1	Homo sapiens	human being	FA14,m292c10,HPVmSK163	7056	40.1753	1.97908	140	0.495633	0.420087	0.45786	0.285153	47.76	51.2343	1.04669	0.937527	1.03869	0.975468	1.19396	1.16309	0.494104	0.918706	1.05879	0.883173
2010	HPV124	GQ845446	Betapapillomavirus	Betapapillomavirus 1	Beta-HPV	Yes	Yes	7489	65	114	Group 1	Group 1	Group 1	Homo sapiens	human being	FA23	7080	40.6312	2.04283	145	0.50152	0.425532	0.463526	0.287451	48.55	51.3781	1.04245	0.954329	1.04194	0.963747	1.19846	1.15378	0.497968	0.921623	1.03371	0.878616
2013	HPV152	JF304768	Betapapillomavirus	Betapapillomavirus 1	Beta-HPV	Yes	Yes	7480	66	115	Group 1	Group 1	Group 1	Homo sapiens	human being	FA18	7047	40.7785	2.05237	145	0.496503	0.425262	0.460883	0.29764	48.55	52.1598	1.05334	0.931911	1.04444	0.966973	1.20386	1.1457	0.496719	0.922533	1.07223	0.863137
2018#	HPVmSK220	MH777359	Betapapillomavirus	Betapapillomavirus 1	Beta-HPV	Yes	No	7494	67	113	Group 1	Group 1	Group 1	Homo sapiens	human being		7074	40.2848	2.13732	129	0.512239	0.397099	0.454669	0.245694	47.5	48.3486	1.05894	0.917903	1.05272	0.964832	1.22035	1.14689	0.451078	0.935487	1.07699	0.839261
2015	HPV195	KR816182	Betapapillomavirus	Betapapillomavirus 1	Beta-HPV	Yes	Yes	7569	68	117	Group 1	Group 1	Group 1	Homo sapiens	human being	FA132,w15c111,HPVmSK151	7107	41.0807	1.93684	138	0.502822	0.425098	0.46396	0.300478	49.63	52.3	1.03581	0.930088	1.08085	0.962602	1.19566	1.14435	0.461897	0.947484	1.03759	0.869762
2010	HPV118	GQ246951	Betapapillomavirus	Betapapillomavirus 1	Beta-HPV	Yes	Yes	7597	69	118	Group 1	Group 1	Group 1	Homo sapiens	human being		7125	40.8932	2.05796	147	0.502813	0.434011	0.468412	0.285158	48.74	51.2343	1.0531	0.926725	1.02982	0.981384	1.22444	1.14024	0.495467	0.903557	1.11227	0.862135
2015	HPV174	HF930491	Betapapillomavirus	Betapapillomavirus 2	Beta-HPV	Yes	Yes	7359	70	150	Group 1	Group 1	Group 1	Homo sapiens	human being	V001,IA16	6954	40.132	1.83592	128	0.514856	0.418625	0.466741	0.265632	47.63	49.845	1.05247	0.922926	1.09008	0.944207	1.17007	1.15594	0.460917	0.940835	1.05867	0.878145
2010	HPV100	FM955839	Betapapillomavirus	Betapapillomavirus 2	Beta-HPV	Yes	Yes	7380	71	142	Group 1	Group 1	Group 1	Homo sapiens	human being	DL267,vs73-1,FA53	6960	40.0401	2.02064	141	0.51643	0.415187	0.465808	0.264654	47.7	49.7709	1.04515	0.939545	1.04938	0.965289	1.16876	1.16919	0.510268	0.908505	1.0712	0.906059
2018#	HPVm090c09	MF588681	Betapapillomavirus	Betapapillomavirus 2	Beta-HPV	Yes	No	7377	72	143	Group 1	Group 1	Group 1	Homo sapiens	human being		6984	40.16	1.75979	137	0.484076	0.407643	0.44586	0.22202	44.83	46.526	1.03219	0.91876	1.0602	0.985474	1.19332	1.13699	0.490996	0.937777	1.08951	0.882921
2004	HPV23	U31781	Betapapillomavirus	Betapapillomavirus 2	Beta-HPV	Yes	Yes	7324	73	144	Group 1	Group 1	Group 1	Homo sapiens	human being		6903	40.0665	1.64469	140	0.5	0.425066	0.462533	0.269062	46.38	50.0668	1.04825	0.929025	1.07343	0.953521	1.18776	1.10527	0.509643	0.944669	1.09573	0.86625
2018#	HPVTVMBSFc09	MF588684	Betapapillomavirus	Betapapillomavirus 2	Beta-HPV	Yes	No	7363	74	149	Group 1	Group 1	Group 1	Homo sapiens	human being	HPVmSK130	6975	40.0829	2.0306	142	0.509526	0.417811	0.463669	0.27027	48.2	50.1406	1.02927	0.927671	1.06462	0.979222	1.19323	1.10901	0.511214	0.941961	1.09803	0.883219
2013	HPV151	FN677756	Betapapillomavirus	Betapapillomavirus 2	Beta-HPV	Yes	Yes	7386	75	148	Group 1	Group 1	Group 1	Homo sapiens	human being	SIBX2	6957	39.914	2.09319	146	0.514464	0.420561	0.467512	0.257232	47.23	49.1751	1.02851	0.936158	1.03778	0.992278	1.20158	1.11411	0.53173	0.973222	1.03432	0.858272
2004	HPV22	U31780	Betapapillomavirus	Betapapillomavirus 2	Beta-HPV	Yes	Yes	7368	76	147	Group 1	Group 1	Group 1	Homo sapiens	human being		6957	40.3297	2.24949	150	0.55127	0.411071	0.481171	0.36706	52.61	56.5343	1.03323	0.942495	1.05211	0.973349	1.17603	1.13356	0.5346	0.949644	1.03712	0.884422
2018#	HPVm292c14	MF588682	Betapapillomavirus	Betapapillomavirus 2	Beta-HPV	Yes	No	7323	77	145	Group 1	Group 1	Group 1	Homo sapiens	human being	HPVmSK222	6900	39.1443	1.66453	147	0.496922	0.412049	0.454485	0.256816	45.98	49.1751	1.03902	0.907782	1.04371	0.996328	1.16992	1.11318	0.561877	0.968462	1.09318	0.875513
2010	HPV120	GQ845442	Betapapillomavirus	Betapapillomavirus 2	Beta-HPV	Yes	Yes	7304	78	146	Group 1	Group 1	Group 1	Homo sapiens	human being	SIBX-3a,FA16	6891	39.9624	2.25792	156	0.51545	0.405284	0.460367	0.272279	48.76	50.2878	1.05045	0.924206	1.02917	0.985424	1.18844	1.10753	0.572531	0.955576	1.08634	0.857804
2018#	HPVmSK189	MH777331	Gammapapillomavirus	Gammapapillomavirus 24	Gamma-HPV	Yes	No	7392	79	293	Group 1	Group 1	Group 1	Homo sapiens	human being		6768	39.4931	1.38706	142	0.456109	0.389593	0.422851	0.197738	41.67	44.6946	1.02157	0.939821	1.03109	1.00044	1.20499	1.10165	0.54183	0.931187	1.10655	0.892155
2018#	HPVmSE355	KJ506870	Gammapapillomavirus	Gammapapillomavirus 24	Gamma-HPV	Yes	No	7080	80	294	Group 1	Group 1	Group 1	Homo sapiens	human being	HPVmSK081	6708	39.8602	1.96912	146	0.514298	0.411791	0.463044	0.264848	47.51	49.7709	1.0318	0.946446	1.0494	0.972781	1.19701	1.08174	0.553553	0.942725	1.09952	0.877152
2018#	HPVmSK111	MH777253	Betapapillomavirus	Betapapillomavirus 2	Beta-HPV	Yes	No	7328	81	167	Group 1	Group 1	Group 1	Homo sapiens	human being		6930	39.9108	1.86074	108	0.491228	0.39946	0.445344	0.219523	44.07	46.3735	1.05233	0.943422	1.11626	0.910631	1.23029	1.08789	0.39571	0.966227	1.06255	0.819408
2004	HPV93	AY382778	Betapapillomavirus	Betapapillomavirus 1	Beta-HPV	Yes	Yes	7450	82	109	Group 1	Group 1	Group 1	Homo sapiens	human being	FAIMVS6	7032	39.4752	3.28473	117	0.557234	0.453755	0.505495	0.411172	54.72	58.6298	1.07953	0.926143	1.052	0.939668	1.20755	1.17605	0.431599	0.951077	1.02551	0.821235
2004	HPV24	U31782	Betapapillomavirus	Betapapillomavirus 1	Beta-HPV	Yes	Yes	7452	83	111	Group 1	Group 1	Group 1	Homo sapiens	human being		7035	39.9972	2.377	116	0.513259	0.43627	0.474765	0.315227	51.19	53.3309	1.04359	0.957062	1.07758	0.938308	1.21464	1.15038	0.415903	0.912163	1.05768	0.876494
2018#	HPVmSK043	MH777190	Betapapillomavirus	Betapapillomavirus 1	Beta-HPV	Yes	No	7533	84	110	Group 1	Group 1	Group 1	Homo sapiens	human being		6987	40.1428	1.56022	126	0.455446	0.406391	0.430918	0.207471	42.85	45.3812	1.05107	0.93632	1.0492	0.964677	1.22862	1.13925	0.450766	0.920873	1.08398	0.853924
2018#	HPVFA19107	KC176801	Betapapillomavirus	Betapapillomavirus 2	Beta-HPV	Yes	No	7273	85	160	Group 1	Group 1	Group 1	Homo sapiens	human being	FA60	7002	39.4017	1.97789	130	0.5045	0.39694	0.45072	0.257876	47.09	49.2499	1.04971	0.971274	1.06434	0.931108	1.20156	1.11391	0.483684	0.922353	1.06411	0.873401
2018#	HPVmSK164	MH777306	Betapapillomavirus	Betapapillomavirus 2	Beta-HPV	Yes	No	7410	86	156	Group 1	Group 1	Group 1	Homo sapiens	human being		6993	39.6234	2.01754	132	0.5181	0.397738	0.457919	0.239819	46.69	47.8949	1.06427	0.963476	1.05887	0.925406	1.20196	1.12288	0.485726	0.918164	1.07081	0.86088
2004	HPV80	Y15176	Betapapillomavirus	Betapapillomavirus 2	Beta-HPV	Yes	Yes	7427	87	158	Group 1	Group 1	Group 1	Homo sapiens	human being	JC9813-A	7014	39.818	2.5266	126	0.556582	0.444804	0.500693	0.389376	52.44	57.6648	1.05697	0.936445	1.08718	0.930516	1.20468	1.10682	0.457815	0.937632	1.0973	0.851659
2015	HPV182	KR816170	Betapapillomavirus	Betapapillomavirus 2	Beta-HPV	Yes	Yes	7416	88	157	Group 1	Group 1	Group 1	Homo sapiens	human being	FA114,LCOSOc207,HPV217,HPVmSK005	7008	39.9231	1.80757	127	0.507067	0.419611	0.463339	0.264576	46.56	49.7709	1.03319	0.951841	1.09663	0.940464	1.18683	1.1198	0.459654	0.930478	1.07132	0.894394
2004	HPV15	X74468	Betapapillomavirus	Betapapillomavirus 2	Beta-HPV	Yes	Yes	7413	89	159	Group 1	Group 1	Group 1	Homo sapiens	human being		6996	39.6208	1.93898	136	0.50885	0.414602	0.461726	0.257522	46.66	49.2499	1.05903	0.964278	1.07632	0.917943	1.20505	1.07714	0.500093	0.933288	1.09211	0.853498
2018#	HPVmSK001	MH675888	Betapapillomavirus	Betapapillomavirus 2	Beta-HPV	Yes	No	7448	90	155	Group 1	Group 1	Group 1	Homo sapiens	human being		7041	39.9348	1.50783	139	0.476449	0.408514	0.442482	0.217391	43.51	46.1445	1.04368	0.973284	1.06778	0.932845	1.23078	1.05706	0.499133	0.937849	1.08804	0.847611
2004	HPV37	U31786	Betapapillomavirus	Betapapillomavirus 2	Beta-HPV	Yes	Yes	7421	91	153	Group 1	Group 1	Group 1	Homo sapiens	human being		7017	40.7534	2.06097	147	0.514147	0.422635	0.468391	0.282935	47.98	51.0899	1.06423	0.936065	1.07383	0.932309	1.19039	1.11263	0.510474	0.946662	1.07304	0.844447
2004	HPV17	X74469	Betapapillomavirus	Betapapillomavirus 2	Beta-HPV	Yes	Yes	7427	92	154	Group 1	Group 1	Group 1	Homo sapiens	human being		6984	40.9597	2.01371	141	0.517928	0.419212	0.46857	0.28641	48.44	51.3063	1.03494	0.949639	1.06775	0.956439	1.23429	1.08451	0.486319	0.934284	1.0968	0.851083
2013	HPV145	HM999997	Betapapillomavirus	Betapapillomavirus 2	Beta-HPV	Yes	Yes	7375	93	151	Group 1	Group 1	Group 1	Homo sapiens	human being	IA16,CL4112	6945	40.629	1.76648	123	0.520426	0.418739	0.469583	0.275311	47.27	50.5078	1.04384	0.962131	1.05501	0.949159	1.23481	1.14843	0.432255	0.908547	1.05077	0.862276
2018#	HPVmSK027	MH777175	Betapapillomavirus	Betapapillomavirus 2	Beta-HPV	Yes	No	7414	94	162	Group 1	Group 1	Group 1	Homo sapiens	human being		6987	40.2284	1.64973	131	0.478558	0.411496	0.445027	0.248631	45.31	48.5747	1.03331	0.952289	1.09121	0.941221	1.17552	1.14146	0.466838	0.927353	1.04771	0.901067
2010	HPV111	EU410349	Betapapillomavirus	Betapapillomavirus 2	Beta-HPV	Yes	Yes	7384	95	164	Group 1	Group 1	Group 1	Homo sapiens	human being	FA51	6906	40.1213	1.79087	124	0.522321	0.416964	0.469643	0.259375	47.71	49.3245	1.03361	0.94744	1.08932	0.945149	1.19993	1.1233	0.447823	0.918584	1.08344	0.890123
2013	HPV159	HE963025	Betapapillomavirus	Betapapillomavirus 2	Beta-HPV	Yes	Yes	7443	96	161	Group 1	Group 1	Group 1	Homo sapiens	human being	SIBX8	7011	40.8166	2.00598	141	0.521586	0.429956	0.475771	0.268282	48.17	49.993	1.02761	0.97057	1.08836	0.934819	1.20026	1.09989	0.485463	0.9317	1.05011	0.884245
2010	HPV110	EU410348	Betapapillomavirus	Betapapillomavirus 2	Beta-HPV	Yes	Yes	7423	97	152	Group 1	Group 1	Group 1	Homo sapiens	human being	FA5	7017	40.0142	1.90476	134	0.524041	0.419497	0.471769	0.251875	46.47	48.8004	1.04922	0.919105	1.09084	0.946727	1.21758	1.06179	0.482442	0.922658	1.1917	0.859508
2010	HPV122	GQ845444	Betapapillomavirus	Betapapillomavirus 2	Beta-HPV	Yes	Yes	7397	98	165	Group 1	Group 1	Group 1	Homo sapiens	human being	vs9	7002	40.5128	1.95157	137	0.519806	0.422535	0.471171	0.268486	48.04	49.993	1.04421	0.955187	1.0805	0.934595	1.21881	1.0849	0.480827	0.937455	1.08449	0.85213
2010	HPV113	FM955842	Betapapillomavirus	Betapapillomavirus 2	Beta-HPV	Yes	Yes	7412	99	163	Group 1	Group 1	Group 1	Homo sapiens	human being	DL250	7014	40.3726	1.74915	123	0.517347	0.42029	0.468819	0.268336	47.29	49.993	1.04153	0.922719	1.10939	0.939918	1.21336	1.09407	0.43187	0.936897	1.12005	0.859583
2004	HPV9	X74464	Betapapillomavirus	Betapapillomavirus 2	Beta-HPV	Yes	Yes	7434	100	166	Group 1	Group 1	Group 1	Homo sapiens	human being		7020	41.0486	2.85926	128	0.565157	0.449168	0.507163	0.427449	53.73	59.2165	1.05156	0.971167	1.0839	0.915463	1.22247	1.12826	0.435925	0.919496	1.03873	0.854542
2017	HPV209	KY242583	Betapapillomavirus	Betapapillomavirus 2	Beta-HPV	Yes	Yes	7399	101	139	Group 1	Group 1	Group 1	Homo sapiens	human being	FA108	6996	40.2481	2.27367	130	0.506399	0.433447	0.469923	0.299915	49.78	52.3	1.0702	0.941429	1.09082	0.914519	1.19279	1.12128	0.460913	0.915344	1.0991	0.862996
2010	HPV107	EF422221	Betapapillomavirus	Betapapillomavirus 2	Beta-HPV	Yes	Yes	7562	102	140	Group 1	Group 1	Group 1	Homo sapiens	human being	FA85,DL285	7020	40.9207	1.97499	139	0.515873	0.416226	0.466049	0.291446	49.76	51.6643	1.07551	0.921549	1.0626	0.940438	1.20013	1.1489	0.476153	0.903917	1.11331	0.85688
2004	HPV49	X74480	Betapapillomavirus	Betapapillomavirus 3	Beta-HPV	Yes	Yes	7560	103	177	Group 1	Group 1	Group 1	Homo sapiens	human being		7104	41.2384	2.41047	138	0.5151	0.435134	0.475117	0.330923	52.64	54.3842	1.02311	0.934045	1.08933	0.965568	1.17972	1.16086	0.459329	0.931727	1.03848	0.903378
2018#	HPVmSK209	MH777350	Betapapillomavirus	Betapapillomavirus 5	Beta-HPV	Yes	No	6971	104	171	Group 1	Group 1	Group 1	Homo sapiens	human being		6645	39.8019	1.58877	118	0.490205	0.389871	0.440038	0.236025	44.7	47.5916	1.06438	0.918285	1.10996	0.921442	1.18763	1.10275	0.455274	0.953363	1.11118	0.84646
2015	HPV185	KR816172	Betapapillomavirus	Betapapillomavirus 5	Beta-HPV	Yes	Yes	7444	105	172	Group 1	Group 1	Group 1	Homo sapiens	human being	FA70	7032	40.6241	1.82979	129	0.501757	0.421353	0.461555	0.290422	47.46	51.593	1.07344	0.919716	1.09966	0.919	1.18669	1.13797	0.45111	0.940886	1.08406	0.844443
2004	HPV96	AY382779	Betapapillomavirus	Betapapillomavirus 5	Beta-HPV	Yes	Yes	7438	106	170	Group 1	Group 1	Group 1	Homo sapiens	human being	FA47	7032	40.2979	1.92422	124	0.471698	0.429821	0.450759	0.242522	44.7	48.122	1.08323	0.907945	1.10015	0.914828	1.16028	1.18093	0.44178	0.977515	1.00826	0.826864
2013	HPV150	FN677755	Betapapillomavirus	Betapapillomavirus 5	Beta-HPV	Yes	Yes	7436	107	168	Group 1	Group 1	Group 1	Homo sapiens	human being	SIBX1,FA22	7017	39.7015	1.70576	120	0.498239	0.420335	0.459287	0.265845	45.77	49.845	1.06652	0.893039	1.12224	0.927221	1.15311	1.14892	0.440823	0.961917	1.09104	0.861216
2018#	HPVEV03c09	MF588687	Betapapillomavirus	Betapapillomavirus 5	Beta-HPV	Yes	No	7415	108	169	Group 1	Group 1	Group 1	Homo sapiens	human being	HPVmSK060	7017	40.4975	1.32983	128	0.476492	0.399186	0.437839	0.193038	41.4	44.3137	1.08079	0.921411	1.0972	0.909697	1.16917	1.16487	0.45273	0.943827	1.05401	0.84518
2018#	HPVm292c100	MF588685	Betapapillomavirus	Betapapillomavirus 4	Beta-HPV	Yes	No	7443	109	175	Group 1	Group 1	Group 1	Homo sapiens	human being	HPVmSK082	7047	39.7169	2.12489	118	0.508733	0.40215	0.455441	0.257949	46.93	49.2499	1.07266	0.906864	1.09959	0.931327	1.14688	1.20238	0.431955	0.925782	1.07257	0.887278
2004	HPV92	AF531420	Betapapillomavirus	Betapapillomavirus 4	Beta-HPV	Yes	Yes	7461	110	173	Group 1	Group 1	Group 1	Homo sapiens	human being	FAIMVS2	7059	40.0735	1.65957	119	0.491444	0.42738	0.459412	0.258885	45.73	49.3245	1.07811	0.886135	1.10031	0.936006	1.16386	1.18611	0.426658	0.944975	1.08636	0.85365
2018#	HPVTVMGc2024	MF588686	Betapapillomavirus	Betapapillomavirus 4	Beta-HPV	Yes	No	7438	111	174	Group 1	Group 1	Group 1	Homo sapiens	human being	HPVmSK069	7038	39.0306	1.45975	103	0.490385	0.420017	0.455201	0.253497	44.69	48.8754	1.06142	0.91716	1.1399	0.906691	1.1661	1.13871	0.390182	0.976715	1.04554	0.851461
2018#	HPVm292c88	MF588683	Betapapillomavirus	Betapapillomavirus 2	Beta-HPV	Yes	No	7449	112	137	Group 1	Group 1	Group 1	Homo sapiens	human being	HPVmSK162,FA60	7011	39.0667	2.17068	117	0.516337	0.40543	0.460884	0.269213	48.08	50.0668	1.05526	0.915596	1.08652	0.947415	1.16183	1.17639	0.443626	0.95504	1.04271	0.873471
2010	HPV104	FM955840	Betapapillomavirus	Betapapillomavirus 2	Beta-HPV	Yes	Yes	7386	113	138	Group 1	Group 1	Group 1	Homo sapiens	human being	DL253,FA75	6960	39.7105	1.51906	106	0.513969	0.41286	0.463415	0.258093	46.09	49.2499	1.04243	0.883504	1.14688	0.940278	1.18878	1.10507	0.390432	0.990051	1.10131	0.842134
2010	HPV98	FM955837	Betapapillomavirus	Betapapillomavirus 1	Beta-HPV	Yes	Yes	7465	114	112	Group 1	Group 1	Group 1	Homo sapiens	human being	GA1-3	7059	41.4724	2.46708	162	0.504921	0.432606	0.468763	0.334617	51.73	54.6391	1.04694	0.938417	1.00595	0.995956	1.20038	1.17646	0.539138	0.906982	1.05498	0.879955
2010	HPV115	FJ947080	Betapapillomavirus	Betapapillomavirus 3	Beta-HPV	Yes	Yes	7476	115	176	Group 1	Group 1	Group 1	Homo sapiens	human being	A3,GC02	7089	41.7476	2.05431	146	0.504139	0.431808	0.467974	0.310675	49.23	53.0598	1.03249	0.975497	1.03104	0.969912	1.2104	1.19162	0.476719	0.92111	0.963233	0.87961
2004	HPV76	Y15174	Betapapillomavirus	Betapapillomavirus 3	Beta-HPV	Yes	Yes	7549	116	179	Group 1	Group 1	Group 1	Homo sapiens	human being	CR148-59	7113	41.8735	3.15991	139	0.559578	0.455545	0.507562	0.406508	54.53	58.4675	1.01604	0.928755	1.04859	1.00609	1.21568	1.18847	0.448853	0.936821	1.0075	0.879078
2004	HPV75	Y15173	Betapapillomavirus	Betapapillomavirus 3	Beta-HPV	Yes	Yes	7537	117	178	Group 1	Group 1	Group 1	Homo sapiens	human being	vs40-1	7086	41.5259	1.94924	146	0.517973	0.433521	0.475747	0.30013	48.75	52.3	1.04075	0.919428	1.02262	1.00578	1.22552	1.17386	0.482122	0.95537	1.01378	0.83511
2004	HPV1	V01116	Mupapillomavirus	Mupapillomavirus 1	Mu/Nu-HPV	Yes	No	7816	118	555	Group 1	Group 1	Group 2	Homo sapiens	human being		6765	41.147	1.94604	132	0.507995	0.416629	0.462312	0.306076	48.7	52.7169	1.1007	0.911976	1.12262	0.877682	1.18472	1.10065	0.462613	0.955809	1.09345	0.80255
2004	HPV63	X70828	Mupapillomavirus	Mupapillomavirus 2	Mu/Nu-HPV	Yes	No	7348	119	554	Group 1	Group 1	Group 1	Homo sapiens	human being		6768	40.333	1.59497	124	0.495234	0.422152	0.458693	0.262369	46.32	49.5481	1.00749	0.931979	1.09241	0.977152	1.22223	1.08523	0.452477	0.96627	1.07281	0.865999
2004	HPV38	U31787	Betapapillomavirus	Betapapillomavirus 2	Beta-HPV	Yes	Yes	7400	120	141	Group 1	Group 1	Group 1	Homo sapiens	human being		6969	40.833	2.0649	144	0.48943	0.439798	0.464614	0.294118	48.67	51.8775	1.04335	0.895716	1.05803	0.990658	1.20021	1.13136	0.498355	0.969174	1.07285	0.841403
2018#	MmPV5	MH745747	Gammapapillomavirus	Gammapapillomavirus 7	NHP-PV	Yes	No	7408	121	250	Group 1	Group 1	Group 1	Macacca mulatta	Rhesus macaque		6864	40.6713	2.01976	139	0.507644	0.416817	0.46223	0.291817	49.39	51.7355	1.04855	0.897261	1.08514	0.963185	1.20076	1.09453	0.49568	0.95748	1.134	0.842581
2004	HPV4	X70827	Gammapapillomavirus	Gammapapillomavirus 1	Gamma-HPV	Yes	Yes	7353	122	273	Group 1	Group 1	Group 1	Homo sapiens	human being		6834	38.6165	2.59587	118	0.527064	0.43945	0.483257	0.379817	51.25	57.2211	1.05973	0.889048	1.11193	0.941366	1.17226	1.08633	0.466162	1.01342	1.07849	0.82486
2004	HPV95	AJ620210	Gammapapillomavirus	Gammapapillomavirus 1	Gamma-HPV	Yes	Yes	7337	123	274	Group 1	Group 1	Group 1	Homo sapiens	human being		6840	39.3118	1.75887	109	0.498239	0.421215	0.459727	0.283891	46.74	51.1622	1.06261	0.87889	1.10992	0.946116	1.18326	1.13602	0.414723	1.0378	1.00066	0.795309
2004	HPV65	X70829	Gammapapillomavirus	Gammapapillomavirus 1	Gamma-HPV	Yes	Yes	7308	124	272	Group 1	Group 1	Group 1	Homo sapiens	human being		6816	39.523	1.70251	109	0.482085	0.417869	0.449977	0.267101	45.75	49.9191	1.06661	0.855839	1.15948	0.924455	1.16071	1.10162	0.41283	1.0346	1.07563	0.805894
2004	HPV88	EF467176	Gammapapillomavirus	Gammapapillomavirus 5	Gamma-HPV	Yes	Yes	7326	125	508	Group 1	Group 1	Group 1	Homo sapiens	human being		6819	39.9152	2.85332	130	0.55468	0.45088	0.50278	0.425857	53.07	59.1828	1.08172	0.847708	1.09165	0.959098	1.15264	1.15489	0.479581	1.00383	1.07352	0.814665
2018#	HPV215	MF509820	Gammapapillomavirus	Gammapapillomavirus 9	Gamma-HPV	Yes	Yes	7186	126	409	Group 1	Group 1	Group 1	Homo sapiens	human being		6741	38.7779	1.4978	116	0.480892	0.391265	0.436078	0.242493	44.45	48.0463	1.06893	0.97094	1.00459	0.94808	1.24889	1.14329	0.461242	0.858765	1.1372	0.864193
2018#	HPV219	MH172376	Gammapapillomavirus	Gammapapillomavirus 13	Gamma-HPV	Yes	Yes	7108	127	430	Group 1	Group 1	Group 1	Homo sapiens	human being		6717	39.6733	2.15054	150	0.514654	0.419627	0.46714	0.271314	47.91	50.2142	1.05015	0.964063	0.970267	0.994236	1.22834	1.132	0.5683	0.857358	1.14418	0.894485
2018#	HPV213	MF509818	Gammapapillomavirus	Gammapapillomavirus 13	Gamma-HPV	Yes	Yes	7096	128	429	Group 1	Group 1	Group 1	Homo sapiens	human being		6723	39.8161	2.16092	147	0.535171	0.428707	0.481939	0.30846	49.77	52.8546	1.0501	0.989267	0.976886	0.973239	1.24061	1.12103	0.552596	0.851835	1.12399	0.889537
2018#	HPVw27c03a	MF588758	Gammapapillomavirus	Gammapapillomavirus 7	Gamma-HPV	Yes	No	7328	129	253	Group 1	Group 1	Group 1	Homo sapiens	human being	HPVmSK161,HPVmSK214,KC78	6900	38.3203	1.35877	94	0.487444	0.412556	0.45	0.243049	44.39	48.122	1.06616	0.91369	1.17911	0.877107	1.16688	1.07297	0.374515	0.974847	1.11956	0.846652
2013	HPV134	GU117634	Gammapapillomavirus	Gammapapillomavirus 7	Gamma-HPV	Yes	Yes	7309	130	252	Group 1	Group 1	Group 1	Homo sapiens	human being	FA1	6828	38.1245	1.15396	79	0.476428	0.411605	0.444016	0.251133	45.02	48.7252	1.03241	0.937489	1.16784	0.905393	1.19013	1.10145	0.323055	0.962258	1.07958	0.876285
2018#	HPVDysk3	KX781282	Gammapapillomavirus	Gammapapillomavirus 7	Gamma-HPV	Yes	No	7314	131	251	Group 1	Group 1	Group 1	Homo sapiens	human being	HPVmSK026	6825	39.091	2.02329	85	0.507879	0.397118	0.452499	0.281855	48.52	51.0176	1.04621	0.913267	1.14036	0.922286	1.20541	1.1361	0.329956	0.93168	1.12185	0.868499
2013	HPV170	JX413110	Gammapapillomavirus	Gammapapillomavirus 7	Gamma-HPV	Yes	Yes	7417	132	234	Group 1	Group 1	Group 1	Homo sapiens	human being	KC8	6900	37.8144	1.47441	102	0.487751	0.421381	0.454566	0.220045	44.03	46.3735	1.05935	0.908546	1.1323	0.916495	1.18025	1.07357	0.417155	0.971247	1.13695	0.849105
2015	HPV189	KR816176	Gammapapillomavirus	Gammapapillomavirus 7	Gamma-HPV	Yes	Yes	7318	133	247	Group 1	Group 1	Group 1	Homo sapiens	human being	FA54,LCOSOc125,HPV218,HPVmSK053	6870	37.3113	1.55343	107	0.476276	0.412265	0.44427	0.225157	43.94	46.7548	1.06321	0.945937	1.1247	0.895934	1.17684	1.04703	0.451033	0.970765	1.1044	0.850026
2018#	HPVEV03c05	MF588698	Gammapapillomavirus	Gammapapillomavirus 7	Gamma-HPV	Yes	No	7319	134	246	Group 1	Group 1	Group 1	Homo sapiens	human being	HPVmSK187	6846	37.5583	1.81947	108	0.503524	0.419383	0.461454	0.286784	47.77	51.3781	1.06716	0.93555	1.12813	0.895196	1.18155	1.03899	0.45	0.98152	1.10833	0.835316
2013	HPV155	JF906559	Gammapapillomavirus	Gammapapillomavirus 7	Gamma-HPV	Yes	Yes	7352	135	243	Group 1	Group 1	Group 1	Homo sapiens	human being	SE42	6846	38.039	1.44231	99	0.490566	0.404313	0.447439	0.240791	45.38	47.9706	1.06178	0.94202	1.09655	0.91644	1.22512	1.07733	0.403588	0.97169	1.07623	0.819011
2018#	HPVDysk2	KX781281	Gammapapillomavirus	Gammapapillomavirus 7	Gamma-HPV	Yes	No	7330	136	248	Group 1	Group 1	Group 1	Homo sapiens	human being	HPVmSK153,SE2	6867	38.0392	1.24215	96	0.490926	0.412886	0.451906	0.265426	46.21	49.7709	1.05325	0.93668	1.10799	0.92055	1.21645	1.08608	0.388261	0.961329	1.08794	0.838656
2018#	HPVw20c01a	MF588701	Gammapapillomavirus	Gammapapillomavirus 7	Gamma-HPV	Yes	No	7314	137	249	Group 1	Group 1	Group 1	Homo sapiens	human being	HPVmSK149	6852	37.8311	1.52838	105	0.480899	0.415281	0.44809	0.233708	44.82	47.4397	1.05603	0.922162	1.13506	0.911594	1.19076	1.0374	0.430993	0.982814	1.12879	0.840541
2015	HPV193	KR816180	Gammapapillomavirus	Gammapapillomavirus 7	Gamma-HPV	Yes	Yes	7348	138	244	Group 1	Group 1	Group 1	Homo sapiens	human being	HPVmSK006,FA57	6870	38.3275	1.49535	103	0.486317	0.404666	0.445491	0.253028	45.89	48.8754	1.06266	0.915147	1.10063	0.929042	1.22961	1.06143	0.411103	0.977795	1.12155	0.80966
2013	HPV149	GU117629	Gammapapillomavirus	Gammapapillomavirus 7	Gamma-HPV	Yes	Yes	7333	139	245	Group 1	Group 1	Group 1	Homo sapiens	human being		6855	38.3384	1.64411	113	0.493954	0.412002	0.452978	0.238692	45.97	47.8191	1.0577	0.910891	1.12384	0.921352	1.18293	1.05918	0.450954	0.972438	1.13736	0.846234
2013	HPV139	HM999991	Gammapapillomavirus	Gammapapillomavirus 7	Gamma-HPV	Yes	Yes	7360	140	240	Group 1	Group 1	Group 1	Homo sapiens	human being	FA105,GH1646	6861	38.9592	1.78805	123	0.504505	0.415315	0.45991	0.244144	46.32	48.1976	1.07838	0.896146	1.10398	0.922217	1.19568	1.05928	0.474775	0.975613	1.15027	0.812801
2010	HPV109	EU541441	Gammapapillomavirus	Gammapapillomavirus 7	Gamma-HPV	Yes	Yes	7346	141	239	Group 1	Group 1	Group 1	Homo sapiens	human being	FA137	6885	38.1573	1.4921	103	0.491503	0.406082	0.448792	0.24195	44.22	48.0463	1.06588	0.929441	1.09151	0.922006	1.22411	1.07854	0.414343	0.952769	1.12235	0.824953
2010	HPV123	GQ845445	Gammapapillomavirus	Gammapapillomavirus 7	Gamma-HPV	Yes	Yes	7329	142	235	Group 1	Group 1	Group 1	Homo sapiens	human being	FA136	6861	38.5812	1.4537	100	0.488779	0.421005	0.454892	0.24237	45.08	48.0463	1.06592	0.890767	1.1153	0.930478	1.1926	1.1192	0.395499	0.960704	1.13113	0.837893
2018#	HPV225	MG520499	Gammapapillomavirus	Gammapapillomavirus 7	Gamma-HPV	Yes	Yes	7320	143	238	Group 1	Group 1	Group 1	Homo sapiens	human being	HPVmSK097,HPVmSK158,HPVEV03c60	6849	38.3719	2.17525	109	0.53963	0.442335	0.490982	0.307072	49.4	52.7859	1.05134	0.923702	1.13061	0.915659	1.1848	1.06221	0.434612	0.970503	1.11643	0.852669
2018#	HPVmSK019	MH777167	Gammapapillomavirus	Gammapapillomavirus 7	Gamma-HPV	Yes	No	7414	144	237	Group 1	Group 1	Group 1	Homo sapiens	human being		6849	38.7797	1.72984	104	0.48626	0.396367	0.441313	0.242664	45.56	48.122	1.0483	0.889408	1.1274	0.94151	1.20101	1.07872	0.405228	0.963014	1.16113	0.848137
2013	HPV138	HM999990	Gammapapillomavirus	Gammapapillomavirus 7	Gamma-HPV	Yes	Yes	7353	145	242	Group 1	Group 1	Group 1	Homo sapiens	human being	FA20,GH13	6849	39.0418	1.73293	119	0.492537	0.41972	0.456128	0.254184	46.59	48.9505	1.02833	0.943529	1.09405	0.947758	1.21643	1.06047	0.458525	0.953319	1.10971	0.863025
2015	HPV186	KR816173	Gammapapillomavirus	Gammapapillomavirus 7	Gamma-HPV	Yes	Yes	7389	146	236	Group 1	Group 1	Group 1	Homo sapiens	human being	HPVmSK052,FA138	6870	39.4164	1.65505	114	0.495957	0.424978	0.460467	0.257412	46.24	49.1751	1.04028	0.907076	1.09919	0.956858	1.23537	1.05966	0.428846	0.949633	1.16616	0.839627
2018#	HPVw20c09	MF588703	Gammapapillomavirus	Gammapapillomavirus 7	Gamma-HPV	Yes	No	7410	147	241	Group 1	Group 1	Group 1	Homo sapiens	human being	FA87	6837	39.1831	1.86725	128	0.491648	0.415801	0.453725	0.263205	46.99	49.6225	1.07673	0.899885	1.0615	0.949033	1.1974	1.11168	0.489949	0.961101	1.11004	0.821127
2018#	HPVEV06c107	MF588747	Gammapapillomavirus	Gammapapillomavirus 24	Gamma-HPV	Yes	No	7298	148	283	Group 1	Group 1	Group 1	Homo sapiens	human being	HPVmSK179	6861	38.3195	1.64247	110	0.482774	0.402539	0.442656	0.257026	45.68	49.1751	1.02098	0.932408	1.04558	0.995041	1.21041	1.15236	0.442621	0.974231	1.014	0.866253
2018#	HPVmSK117	MH777259	Gammapapillomavirus	Gammapapillomavirus 23	Gamma-HPV	Yes	No	7192	149	314	Group 1	Group 1	Group 1	Homo sapiens	human being		6771	38.474	1.46632	123	0.474607	0.401348	0.437978	0.236854	44.24	47.6675	1.06072	0.935871	1.02174	0.965924	1.18726	1.17619	0.493891	0.939605	1.03195	0.859984
2018#	HPVga2c01	MF588744	Gammapapillomavirus	Gammapapillomavirus 23	Gamma-HPV	Yes	No	7209	150	315	Group 1	Group 1	Group 1	Homo sapiens	human being	HPVmSK105	6810	38.7229	1.53644	133	0.474638	0.404891	0.439764	0.225996	44.81	46.831	1.03985	0.943113	1.02952	0.97881	1.18136	1.14667	0.523238	0.949285	1.03074	0.87874
2015	HPV175	KC108721	Gammapapillomavirus	Gammapapillomavirus 23	Gamma-HPV	Yes	Yes	7226	151	316	Group 1	Group 1	Group 1	Homo sapiens	human being	SE87	6813	38.6913	1.74206	119	0.495009	0.412886	0.453947	0.245463	45.87	48.2731	1.0391	0.925703	1.0479	0.978714	1.1886	1.15978	0.469185	0.942983	1.05665	0.878814
2018#	HPVmSK067	MH777212	Gammapapillomavirus	Gammapapillomavirus 22	Gamma-HPV	Yes	No	7395	152	351	Group 1	Group 1	Group 1	Homo sapiens	human being		6825	38.6673	1.74873	111	0.478158	0.406458	0.442308	0.219848	44.2	46.3735	1.05123	0.93908	1.0463	0.960023	1.21144	1.15723	0.436981	0.924292	1.06686	0.864956
2018#	HPVmSK166	MH777308	Gammapapillomavirus	Gammapapillomavirus 24	Gamma-HPV	Yes	No	7361	153	286	Group 1	Group 1	Group 1	Homo sapiens	human being		6852	38.5298	1.58242	137	0.478873	0.392095	0.435484	0.228532	44.05	47.0594	1.05012	0.950148	1.03004	0.964308	1.21196	1.07659	0.542113	0.940315	1.10797	0.856133
2018#	HPVw07c74b	MF588749	Gammapapillomavirus	Gammapapillomavirus 24	Gamma-HPV	Yes	No	7283	154	302	Group 1	Group 1	Group 1	Homo sapiens	human being	HPVmSK226	6861	38.7847	1.96249	135	0.507188	0.407907	0.457547	0.242588	45.7	48.122	1.04974	0.975984	1.06783	0.924804	1.19886	1.05723	0.524861	0.969861	1.03417	0.845402
2018#	HPVmSK165	MH777307	Gammapapillomavirus	Gammapapillomavirus 24	Gamma-HPV	Yes	No	7281	155	295	Group 1	Group 1	Group 1	Homo sapiens	human being		6822	38.6842	1.99418	138	0.501129	0.395034	0.448081	0.252822	47.01	48.8754	1.0336	0.961529	1.06015	0.954764	1.19082	1.06293	0.542635	0.934409	1.10886	0.889241
2018#	HPVw20c01b	MF588708	Gammapapillomavirus	Gammapapillomavirus 26	Gamma-HPV	Yes	No	7273	156	527	Group 1	Group 1	Group 1	Homo sapiens	human being	HPVmSK048	6831	38.7794	1.92729	132	0.500903	0.399729	0.450316	0.256549	47.14	49.1751	1.06974	0.948328	1.0578	0.928824	1.19679	1.08546	0.516641	0.939718	1.09982	0.845949
2015	HPV187	KR816174	Gammapapillomavirus	Gammapapillomavirus 26	Gamma-HPV	Yes	Yes	7268	157	526	Group 1	Group 1	Group 1	Homo sapiens	human being	HPVmSK140,FA15	6819	38.8036	1.84291	126	0.493442	0.40796	0.450701	0.255993	47.06	49.1003	1.05606	0.983036	1.04586	0.926257	1.21463	1.09961	0.493789	0.957167	1.00325	0.835509
2018#	HPVmSK237	MH777376	Gammapapillomavirus	Gammapapillomavirus 24	Gamma-HPV	Yes	No	7106	158	289	Group 1	Group 1	Group 1	Homo sapiens	human being		6684	39.2122	1.5473	135	0.473877	0.401467	0.437672	0.205775	42.04	45.3048	1.00949	1.00156	1.04288	0.963404	1.23192	1.04998	0.527323	0.935209	1.05465	0.884065
2018#	HPVFD1	JF966375	Gammapapillomavirus	Gammapapillomavirus 24	Gamma-HPV	Yes	No	7286	159	291	Group 1	Group 1	Group 1	Homo sapiens	human being		6858	38.8743	1.33745	136	0.485675	0.401546	0.443611	0.2201	43.13	46.3735	1.04628	0.989051	1.02822	0.945016	1.21551	1.09324	0.528721	0.948657	1.01468	0.851295
2018#	HPVEV03c40	MF588746	Gammapapillomavirus	Gammapapillomavirus 24	Gamma-HPV	Yes	No	7300	160	292	Group 1	Group 1	Group 1	Homo sapiens	human being	HPVmSK221,FA34	6861	39.7732	1.69516	136	0.468018	0.37973	0.423874	0.212613	43.84	45.8392	1.03639	0.99405	1.04139	0.942978	1.23437	1.08253	0.504119	0.953997	1.00453	0.8416
2015	HPV190	KR816177	Gammapapillomavirus	Gammapapillomavirus 24	Gamma-HPV	Yes	Yes	7275	161	290	Group 1	Group 1	Group 1	Homo sapiens	human being	HPVmSK193,FA89	6858	39.8487	2.13787	147	0.518902	0.39919	0.459046	0.272277	48.75	50.2878	1.02739	0.970789	1.07151	0.947245	1.188	1.06974	0.542354	0.941665	1.06995	0.889152
2018#	HPVmSK192	MH777334	Gammapapillomavirus	Gammapapillomavirus 24	Gamma-HPV	Yes	No	7288	162	287	Group 1	Group 1	Group 1	Homo sapiens	human being		6858	38.9471	1.7094	122	0.482364	0.407696	0.44503	0.230875	44.97	47.2116	1.06048	0.967585	1.03242	0.941971	1.23425	1.11409	0.472263	0.913763	1.08001	0.846522
2018#	HPVDysk1	KX781280	Gammapapillomavirus	Gammapapillomavirus 24	Gamma-HPV	Yes	No	7335	163	301	Group 1	Group 1	Group 1	Homo sapiens	human being	HPVmSK181	6873	39.2541	1.39434	137	0.480735	0.418459	0.449597	0.237455	44.63	47.6675	1.03743	0.933558	1.03702	0.984405	1.20377	1.1113	0.520648	0.933558	1.1021	0.875552
2018#	HPVw34c28a	MF588751	Gammapapillomavirus	Gammapapillomavirus 24	Gamma-HPV	Yes	No	7324	164	282	Group 1	Group 1	Group 1	Homo sapiens	human being		6864	39.102	1.8018	124	0.51417	0.39901	0.45659	0.253711	47.76	48.9505	1.05006	0.950716	1.02272	0.968571	1.23996	1.11952	0.477033	0.932409	1.07332	0.839846
2018#	HPVmSK094	MH777237	Gammapapillomavirus	Gammapapillomavirus 24	Gamma-HPV	Yes	No	7276	165	284	Group 1	Group 1	Group 1	Homo sapiens	human being		6858	38.8743	1.59497	133	0.49	0.397273	0.443636	0.248636	46.72	48.5747	1.07274	0.944985	1.02577	0.947071	1.21918	1.10287	0.517697	0.922951	1.11714	0.837854
2015	HPV197	KM085343	Gammapapillomavirus	Gammapapillomavirus 24	Gamma-HPV	Yes	Yes	7278	166	285	Group 1	Group 1	Group 1	Homo sapiens	human being	SE46	6861	39.5406	1.96249	135	0.505845	0.395234	0.45054	0.278327	48.02	50.727	1.06025	0.937674	1.02159	0.968905	1.25023	1.08228	0.50672	0.918215	1.14856	0.83163
2018#	HPVDysk5	KX781284	Gammapapillomavirus	Gammapapillomavirus 24	Gamma-HPV	Yes	No	7281	167	288	Group 1	Group 1	Group 1	Homo sapiens	human being		6852	39.7525	1.54632	139	0.462196	0.416292	0.439244	0.231773	44.84	47.2877	1.05308	0.931104	1.04172	0.965513	1.23377	1.07033	0.517541	0.935967	1.14306	0.835385
2018#	HPVmSK227	MH777366	Gammapapillomavirus	Gammapapillomavirus 24	Gamma-HPV	Yes	No	7278	168	296	Group 1	Group 1	Group 1	Homo sapiens	human being		6813	38.662	1.39439	146	0.481397	0.395191	0.438294	0.216425	43.71	46.0682	1.04822	0.974112	0.991397	0.974498	1.2235	1.0871	0.575986	0.939543	1.05729	0.849762
2018#	HPVmSK169	MH777311	Gammapapillomavirus	Gammapapillomavirus 24	Gamma-HPV	Yes	No	7264	169	297	Group 1	Group 1	Group 1	Homo sapiens	human being		6795	39.8943	1.32567	153	0.477014	0.390533	0.433773	0.212563	42.81	45.8392	1.05228	0.983061	0.984285	0.969515	1.23648	1.10299	0.56862	0.929195	1.03689	0.837752
2018#	HPVmSK119	MH777261	Gammapapillomavirus	Gammapapillomavirus 24	Gamma-HPV	Yes	No	7281	170	298	Group 1	Group 1	Group 1	Homo sapiens	human being		6813	40.0234	1.70446	139	0.475906	0.403855	0.439881	0.224874	44.08	46.7548	1.04182	0.968435	1.01966	0.967157	1.23555	1.10945	0.513195	0.903791	1.09285	0.866037
2018#	HPVm090c66	MF588748	Gammapapillomavirus	Gammapapillomavirus 24	Gamma-HPV	Yes	No	7304	171	299	Group 1	Group 1	Group 1	Homo sapiens	human being	HPVmSK127	6867	39.0704	1.67021	127	0.495405	0.418818	0.457112	0.271772	45.64	50.2878	1.06338	0.913969	1.06528	0.951542	1.23368	1.05043	0.48857	0.924951	1.21181	0.835538
2018#	HPVw22c09	MF588750	Gammapapillomavirus	Gammapapillomavirus 24	Gamma-HPV	Yes	No	7326	172	300	Group 1	Group 1	Group 1	Homo sapiens	human being	HPVmSK188	6855	39.4879	2.1388	147	0.5036	0.40459	0.454095	0.270477	47.23	50.1406	1.05456	0.938927	1.0327	0.965844	1.20197	1.09172	0.55277	0.896304	1.16947	0.882966
2018#	HPVmSK090	MH777233	Gammapapillomavirus	Gammapapillomavirus 13	Gamma-HPV	Yes	No	7385	173	431	Group 1	Group 1	Group 1	Homo sapiens	human being		6705	37.3196	1.88042	116	0.48434	0.412165	0.448252	0.266455	46.95	49.845	1.07066	0.901663	1.02756	0.972864	1.20052	1.12138	0.499004	0.927098	1.17438	0.854481
2018#	HPVw07c68b	MF588717	Gammapapillomavirus	Gammapapillomavirus 12	Gamma-HPV	Yes	No	7115	174	463	Group 1	Group 1	Group 1	Homo sapiens	human being	HPVmSK207	6729	37.6315	1.67482	113	0.484862	0.403211	0.444037	0.233486	44.85	47.3637	1.07374	0.905569	1.0546	0.950063	1.21879	1.07382	0.477297	0.973771	1.13622	0.809765
2018#	HPVmSK156	MH777298	Gammapapillomavirus	Gammapapillomavirus 23	Gamma-HPV	Yes	No	7176	175	312	Group 1	Group 1	Group 1	Homo sapiens	human being		6783	37.5386	1.67106	128	0.47911	0.407357	0.443233	0.255223	45.71	49.0254	1.06054	0.915567	1.08614	0.939045	1.16014	1.05597	0.537713	1.02719	1.04602	0.827325
2018#	HPVm090c10	MF588745	Gammapapillomavirus	Gammapapillomavirus 23	Gamma-HPV	Yes	No	7193	176	313	Group 1	Group 1	Group 1	Homo sapiens	human being	HPVmSK136	6801	37.3662	1.9152	120	0.480126	0.404697	0.442412	0.234869	45.1	47.5157	1.07211	0.93489	1.06522	0.929383	1.17551	1.09233	0.50801	0.967473	1.07952	0.84394
2018#	HPVFS1	JF966373	Gammapapillomavirus	Gammapapillomavirus 23	Gamma-HPV	Yes	No	7167	177	317	Group 1	Group 1	Group 1	Homo sapiens	human being	HPVmSK071	6795	37.8981	1.94786	123	0.494096	0.407357	0.450727	0.253406	46.97	48.8754	1.03443	0.895558	1.07891	0.981448	1.16872	1.09143	0.506339	0.985363	1.11147	0.871721
2013	HPV141	HM999993	Gammapapillomavirus	Gammapapillomavirus 11	Gamma-HPV	Yes	Yes	7384	178	384	Group 1	Group 1	Group 1	Homo sapiens	human being	FA73,NJ2801Cn	6783	37.421	1.588	108	0.471044	0.400821	0.435933	0.24259	45.26	48.122	1.04304	0.91044	1.05611	0.977998	1.1842	1.14452	0.456071	1.00588	1.00082	0.844087
2018#	HPVmSK063	MH777208	Gammapapillomavirus	Gammapapillomavirus 11	Gamma-HPV	Yes	No	7338	179	380	Group 1	Group 1	Group 1	Homo sapiens	human being		6885	37.1722	1.51049	110	0.47686	0.399728	0.438294	0.260436	44.6	49.3991	1.07603	0.942834	1.08054	0.911664	1.17978	1.09872	0.464836	0.981292	1.03532	0.82932
2013	HPV136	HM999988	Gammapapillomavirus	Gammapapillomavirus 11	Gamma-HPV	Yes	Yes	7319	180	383	Group 1	Group 1	Group 1	Homo sapiens	human being	FA8,CL3865	6783	38.2297	1.89678	129	0.491587	0.398818	0.445202	0.250114	46.11	48.65	1.0397	0.907829	1.06847	0.976295	1.19051	1.0624	0.522473	0.980057	1.12595	0.855803
2015	HPV154	JN211193	Gammapapillomavirus	Gammapapillomavirus 11	Gamma-HPV	Yes	Yes	7286	181	382	Group 1	Group 1	Group 1	Homo sapiens	human being		6822	37.6901	1.63743	112	0.481818	0.4	0.440909	0.241818	45.08	48.0463	1.07243	0.917608	1.04211	0.954762	1.18654	1.16091	0.462899	0.981106	1.00846	0.827863
2018#	HPVmSK095	MH777238	Gammapapillomavirus	Gammapapillomavirus 11	Gamma-HPV	Yes	No	7277	182	381	Group 1	Group 1	Group 1	Homo sapiens	human being		6816	38.089	1.39011	109	0.477231	0.403916	0.440574	0.203552	42.13	45.1522	1.04984	0.894794	1.05365	0.984285	1.19513	1.15588	0.442138	0.975462	1.0587	0.846516
2013	HPV126	AB646346	Gammapapillomavirus	Gammapapillomavirus 11	Gamma-HPV	Yes	Yes	7326	183	390	Group 1	Group 1	Group 1	Homo sapiens	human being		6801	37.8648	1.75979	120	0.480708	0.408988	0.444848	0.239673	45	47.8949	1.04837	0.910037	1.08706	0.954752	1.18055	1.06989	0.494424	0.991067	1.10009	0.84816
2018#	HPVmSK020	MH777168	Gammapapillomavirus	Gammapapillomavirus 11	Gamma-HPV	Yes	No	7325	184	379	Group 1	Group 1	Group 1	Homo sapiens	human being		6630	37.7106	1.59707	115	0.467269	0.383747	0.425508	0.210384	43.54	45.6102	1.06459	0.910607	1.0707	0.948806	1.20774	1.05352	0.488785	0.991294	1.11358	0.816595
2018#	HPVmSK160	MH777302	Gammapapillomavirus	Gammapapillomavirus 11	Gamma-HPV	Yes	No	7341	185	389	Group 1	Group 1	Group 1	Homo sapiens	human being		6804	38.2586	1.88276	114	0.511062	0.415929	0.463496	0.254867	45.72	49.0254	1.05978	0.930838	1.06612	0.943915	1.21754	1.08558	0.458894	0.968072	1.08283	0.826697
2018#	HPVKN3	JF966374	Gammapapillomavirus	Gammapapillomavirus 11	Gamma-HPV	Yes	No	7251	186	378	Group 1	Group 1	Group 1	Homo sapiens	human being	HPVmSK113	6783	38.4943	2.04202	128	0.470748	0.399093	0.434921	0.243537	46.33	48.1976	1.07821	0.900499	1.02346	0.9705	1.21723	1.10738	0.510737	0.95515	1.12921	0.814721
2018#	HPVw20c03a	MF588715	Gammapapillomavirus	Gammapapillomavirus 11	Gamma-HPV	Yes	No	7252	187	377	Group 1	Group 1	Group 1	Homo sapiens	human being	HPVmSK125	6783	37.9944	1.83797	125	0.487671	0.393607	0.440639	0.252511	46.83	48.8754	1.05095	0.914978	1.0398	0.978981	1.21706	1.07153	0.511655	0.952426	1.1502	0.847018
2018#	HPVmSK150	MH777292	Gammapapillomavirus	Gammapapillomavirus 9	Gamma-HPV	Yes	No	7365	188	403	Group 1	Group 1	Group 1	Homo sapiens	human being		6879	38.5965	1.37823	124	0.457143	0.401319	0.429231	0.22022	43	46.3735	1.0629	0.93236	1.04982	0.95012	1.20766	1.10761	0.486197	0.945819	1.09394	0.842152
2018#	HPVmSK176	MH777318	Gammapapillomavirus	Gammapapillomavirus 9	Gamma-HPV	Yes	No	7271	189	396	Group 1	Group 1	Group 1	Homo sapiens	human being		6768	37.9163	1.49232	113	0.48804	0.404324	0.446182	0.227231	43.29	46.9071	1.05751	0.942774	1.09176	0.922906	1.19193	1.07218	0.469314	0.967814	1.08814	0.846253
2010	HPV116	FJ804072	Gammapapillomavirus	Gammapapillomavirus 9	Gamma-HPV	Yes	Yes	7184	190	395	Group 1	Group 1	Group 1	Homo sapiens	human being		6804	38.3612	1.71504	117	0.488435	0.400454	0.444444	0.254875	45.61	49.0254	1.05405	0.953451	1.03776	0.951845	1.21506	1.12759	0.472854	0.95965	1.02654	0.8375
2018#	HPVw34c14a	MF588694	Gammapapillomavirus	Gammapapillomavirus 9	Gamma-HPV	Yes	No	7271	191	401	Group 1	Group 1	Group 1	Homo sapiens	human being	HPVmSK033	6780	38.4672	2.0153	137	0.489545	0.402273	0.445909	0.255	46.31	49.0254	1.04355	0.957067	1.03289	0.964651	1.21809	1.05376	0.549601	0.930965	1.13531	0.864913
2018#	HPVmSK191	MH777333	Gammapapillomavirus	Gammapapillomavirus 9	Gamma-HPV	Yes	No	7290	192	399	Group 1	Group 1	Group 1	Homo sapiens	human being		6798	38.7617	1.77429	124	0.500675	0.396668	0.448672	0.264295	48	49.6967	1.04691	0.990163	1.04085	0.934338	1.25099	1.0546	0.488365	0.940717	1.06337	0.832438
2018#	HPVmSK091	MH777234	Gammapapillomavirus	Gammapapillomavirus 9	Gamma-HPV	Yes	No	7289	193	402	Group 1	Group 1	Group 1	Homo sapiens	human being		6789	39.004	1.78261	128	0.473094	0.401794	0.437444	0.241256	44.92	47.9706	1.06296	0.996638	1.05221	0.907517	1.20782	1.09893	0.497386	0.925008	1.02974	0.853667
2018#	HPVw27c39c	MF588712	Gammapapillomavirus	Gammapapillomavirus 9	Gamma-HPV	Yes	No	7257	194	400	Group 1	Group 1	Group 1	Homo sapiens	human being	HPVmSK196	6765	39.142	1.97553	134	0.494526	0.399635	0.44708	0.273723	47.43	50.4346	1.08032	0.929582	1.04841	0.93424	1.19571	1.10468	0.521365	0.970429	1.06218	0.813076
2018#	HPVmSK011	MH777159	Gammapapillomavirus	Gammapapillomavirus 9	Gamma-HPV	Yes	No	7398	195	404	Group 1	Group 1	Group 1	Homo sapiens	human being		6633	39.3926	1.39983	137	0.461746	0.40369	0.432718	0.223672	43.15	46.6785	1.09534	0.899293	1.05295	0.937167	1.17009	1.12588	0.535686	0.978642	1.07137	0.809148
2017	HPV202	KP692116	Gammapapillomavirus	Gammapapillomavirus 11	Gamma-HPV	Yes	Yes	7344	196	376	Group 1	Group 1	Group 1	Homo sapiens	human being	SE372	6795	39.3953	1.99618	136	0.488404	0.412915	0.450659	0.27558	47.97	50.581	1.059	0.895102	1.04388	0.981363	1.18158	1.13868	0.517714	0.988546	1.04685	0.830877
2013	HPV140	HM999992	Gammapapillomavirus	Gammapapillomavirus 11	Gamma-HPV	Yes	Yes	7341	197	375	Group 1	Group 1	Group 1	Homo sapiens	human being	NJ2801C1	6795	39.7622	2.08425	142	0.490009	0.411444	0.450727	0.286104	48.95	51.3063	1.06142	0.926561	1.06996	0.941685	1.17904	1.09547	0.531243	0.971908	1.06623	0.839575
2018#	HPVKN1	JF966371	Gammapapillomavirus	Gammapapillomavirus 24	Gamma-HPV	Yes	No	7300	198	281	Group 1	Group 1	Group 1	Homo sapiens	human being	HPVmSK223,Dysk4	6840	37.5182	1.59287	112	0.47221	0.40488	0.438545	0.250339	45.06	48.65	1.05552	0.930547	1.06366	0.949133	1.20051	1.09598	0.467854	0.967869	1.08191	0.844339
2015	HPV178	KJ130020	Gammapapillomavirus	Gammapapillomavirus 24	Gamma-HPV	Yes	Yes	7314	199	280	Group 1	Group 1	Group 1	Homo sapiens	human being		6852	38.2242	1.89229	130	0.508322	0.398561	0.453441	0.232569	45.69	47.3637	1.05578	0.951774	1.04424	0.948293	1.20821	1.07395	0.522486	0.940678	1.10928	0.853464
2018#	HPVmSK056	MH777201	Gammapapillomavirus	Gammapapillomavirus 17	Gamma-HPV	Yes	No	7325	200	304	Group 1	Group 1	Group 1	Homo sapiens	human being		6795	37.9862	1.79118	112	0.488759	0.407824	0.448291	0.234263	44.44	47.4397	1.02898	0.965782	1.11781	0.920671	1.19009	1.04162	0.463334	0.983228	1.05905	0.865614
2018#	HPV212	MF509817	Gammapapillomavirus	Gammapapillomavirus 17	Gamma-HPV	Yes	Yes	7208	201	305	Group 1	Group 1	Group 1	Homo sapiens	human being		6774	38.03	2.18069	112	0.503451	0.416935	0.460193	0.270133	48.36	50.1406	1.05125	0.900865	1.0508	0.980557	1.18574	1.15849	0.459615	0.909611	1.15724	0.891416
2013	HPV144	HM999996	Gammapapillomavirus	Gammapapillomavirus 17	Gamma-HPV	Yes	Yes	7271	202	306	Group 1	Group 1	Group 1	Homo sapiens	human being	FA83,CL3740	6762	38.2596	1.74041	118	0.500914	0.402651	0.451782	0.238117	44.58	47.7433	1.02923	0.944088	1.08021	0.957039	1.20259	1.06806	0.48012	0.9316	1.14334	0.88879
2018#	HPVmSK231	MH777370	Gammapapillomavirus	Gammapapillomavirus 26	Gamma-HPV	Yes	No	7232	203	510	Group 1	Group 1	Group 1	Homo sapiens	human being		6786	37.3457	2.01432	131	0.512442	0.401843	0.457143	0.25576	47	49.1003	1.04532	0.922084	1.10298	0.94121	1.13816	1.04325	0.554641	1.01002	1.07541	0.867654
2018#	HPV224	MF356498	Gammapapillomavirus	Gammapapillomavirus 26	Gamma-HPV	Yes	Yes	7233	204	511	Group 1	Group 1	Group 1	Homo sapiens	human being	HPVICB1,HPVmSK108	6786	37.9924	1.5873	137	0.494817	0.424516	0.459667	0.22758	44.66	46.9833	1.07717	0.904612	1.06807	0.94031	1.14168	1.09968	0.561381	1.00069	1.0613	0.836171
2018#	HPVSE383	KP692118	Gammapapillomavirus	Gammapapillomavirus 25	Gamma-HPV	Yes	No	7317	205	309	Group 1	Group 1	Group 1	Homo sapiens	human being	SE435,HPVw20c05a,HPVmSK032	6837	37.7826	1.53173	105	0.481414	0.406618	0.444016	0.238894	44.75	47.8191	1.04463	0.924645	1.05745	0.967363	1.18528	1.1711	0.434647	0.971808	1.01004	0.860214
2018#	MmPV7	MH745749	Gammapapillomavirus	Gammapapillomavirus	NHP-PV	Yes	No	7292	206	482	Group 1	Group 1	Group 1	Macacca mulatta	Rhesus macaque		6810	38.7815	1.97715	135	0.499545	0.404545	0.452045	0.253636	46.87	48.9505	1.04106	0.908044	1.01045	1.01221	1.16096	1.20358	0.531362	0.947525	1.03517	0.891556
2018#	HPVmSK168	MH777310	Gammapapillomavirus	Gammapapillomavirus 2	Gamma-HPV	Yes	No	7113	207	472	Group 1	Group 1	Group 1	Homo sapiens	human being		6723	37.3832	2.24571	93	0.521383	0.400364	0.460874	0.271611	48.4	50.2878	1.08511	0.986093	1.10017	0.864882	1.18002	1.13581	0.398999	0.893568	1.07687	0.872468
2018#	HPVmSK014	MH777162	Gammapapillomavirus	Gammapapillomavirus 22	Gamma-HPV	Yes	No	7322	208	340	Group 1	Group 1	Group 1	Homo sapiens	human being		6888	36.4321	1.50651	106	0.478478	0.402809	0.440643	0.20435	42.64	45.1522	1.08219	0.946624	1.10043	0.893653	1.12294	1.14768	0.464537	0.951625	1.03425	0.877824
2018#	HPVmSK170	MH777312	Gammapapillomavirus	Gammapapillomavirus 22	Gamma-HPV	Yes	No	7206	209	332	Group 1	Group 1	Group 1	Homo sapiens	human being		6771	36.2645	1.43275	90	0.464592	0.393775	0.429184	0.225981	44.01	46.831	1.10159	0.954647	1.10377	0.865419	1.18024	1.09763	0.409537	0.949548	1.08755	0.824761
2018#	HPVEV03c188	MF588729	Gammapapillomavirus	Gammapapillomavirus 18	Gamma-HPV	Yes	No	7339	210	319	Group 1	Group 1	Group 1	Homo sapiens	human being	HPVmSK148	6813	36.6564	1.66886	85	0.466366	0.407675	0.43702	0.217607	43.82	46.2209	1.05733	0.925527	1.1361	0.907903	1.17015	1.10037	0.376186	0.987313	1.0666	0.852347
2018#	HPVmSK246	MH777385	Gammapapillomavirus	Gammapapillomavirus	Gamma-HPV	Yes	No	7276	211	310	Group 1	Group 1	Group 1	Homo sapiens	human being		6756	36.4187	1.64444	101	0.465383	0.394315	0.429849	0.221458	43.25	46.4498	1.06045	0.984348	1.0838	0.901783	1.20111	1.05293	0.454598	0.971597	1.03522	0.841762
2018#	HPVFD2	JF966376	Gammapapillomavirus	Gammapapillomavirus 9	Gamma-HPV	Yes	No	7219	212	394	Group 1	Group 1	Group 1	Homo sapiens	human being		6786	37.1399	1.34278	91	0.472172	0.403741	0.437956	0.221715	43.99	46.526	1.04816	0.969484	1.11931	0.900996	1.1936	1.08255	0.391645	0.955634	1.05443	0.865195
2013	HPV128	GU225708	Gammapapillomavirus	Gammapapillomavirus 13	Gamma-HPV	Yes	Yes	7259	213	436	Group 1	Group 1	Group 1	Homo sapiens	human being		6774	35.9246	1.4576	99	0.468337	0.391344	0.429841	0.209567	42.84	45.6102	1.1081	0.941514	1.04641	0.89917	1.19864	1.11116	0.455605	0.953027	1.08609	0.807242
2018#	HPVmSK152	MH777294	Gammapapillomavirus	Gammapapillomavirus 22	Gamma-HPV	Yes	No	7238	214	342	Group 1	Group 1	Group 1	Homo sapiens	human being		7020	36.3171	1.52582	97	0.486376	0.391462	0.438919	0.251135	44.79	48.7252	1.09941	1.00631	1.03334	0.879559	1.23485	1.11175	0.421456	0.944872	0.981949	0.799472
2018#	HPVw27c157c	MF588692	Gammapapillomavirus	Gammapapillomavirus 28	Gamma-HPV	Yes	No	7255	215	483	Group 1	Group 1	Group 1	Homo sapiens	human being	HPVmSK024	6783	35.5977	1.51448	103	0.469759	0.380173	0.424966	0.208731	42.7	45.5338	1.08975	0.93639	1.05953	0.915269	1.15317	1.13713	0.481787	1.00181	0.982284	0.827016
2018#	HPVw34c04a	MF588693	Gammapapillomavirus	Gammapapillomavirus 28	Gamma-HPV	Yes	No	7226	216	484	Group 1	Group 1	Group 1	Homo sapiens	human being	HPVmSK154	6768	35.809	1.56204	106	0.467852	0.383493	0.425673	0.213406	42.86	45.8392	1.07934	0.912914	1.0796	0.926939	1.16166	1.08026	0.492148	0.979587	1.12358	0.843715
2018#	HPVmSK078	MH777222	Gammapapillomavirus	Gammapapillomavirus 22	Gamma-HPV	Yes	No	7271	217	326	Group 1	Group 1	Group 1	Homo sapiens	human being		6822	35.1462	1.56726	100	0.484944	0.405843	0.445393	0.239101	45.38	47.8191	1.07407	0.949275	1.06344	0.922357	1.14683	1.13858	0.478765	0.962103	1.03413	0.869332
2018#	HPVEV03c434	MF588755	Gammapapillomavirus	Gammapapillomavirus 22	Gamma-HPV	Yes	No	7282	218	327	Group 1	Group 1	Group 1	Homo sapiens	human being	HPVEV07c385,HPVmSK070	6825	35.6423	1.84693	116	0.478558	0.394617	0.436588	0.218066	43.95	46.2209	1.09233	0.933945	1.08557	0.898874	1.12124	1.09281	0.538253	0.979814	1.07187	0.853577
2018#	HPVmSK132	MH777274	Gammapapillomavirus	Gammapapillomavirus 22	Gamma-HPV	Yes	No	7223	219	321	Group 1	Group 1	Group 1	Homo sapiens	human being		6795	35.1974	1.46843	94	0.469786	0.39891	0.434348	0.204907	43.1	45.2285	1.09191	0.949828	1.08625	0.89027	1.16605	1.09	0.449837	0.983291	1.04324	0.828582
2018#	HPVCH2	KF791917	Gammapapillomavirus	Gammapapillomavirus 22	Gamma-HPV	Yes	No	7190	220	328	Group 1	Group 1	Group 1	Homo sapiens	human being	HPVmSK201	6792	35.3891	1.45379	104	0.491525	0.394411	0.442968	0.210719	43.19	45.6865	1.07637	0.95304	1.08277	0.906574	1.12644	1.13029	0.492981	0.986435	0.990701	0.86421
2018#	HPVmSK022	MH777170	Gammapapillomavirus	Gammapapillomavirus 22	Gamma-HPV	Yes	No	7241	221	330	Group 1	Group 1	Group 1	Homo sapiens	human being		6807	35.6777	1.21987	109	0.467332	0.3902	0.428766	0.205535	42.05	45.3048	1.06879	0.919394	1.09561	0.924989	1.10327	1.13957	0.506348	1.00367	1.00805	0.873837
2018#	HPVmSK183	MH777325	Gammapapillomavirus	Gammapapillomavirus 22	Gamma-HPV	Yes	No	7205	222	329	Group 1	Group 1	Group 1	Homo sapiens	human being		6771	35.7048	1.54767	83	0.478104	0.395937	0.43702	0.209029	43.37	45.5338	1.0775	0.903424	1.08565	0.930108	1.17291	1.1508	0.388713	0.98042	1.07247	0.838668
2018#	HPVw11C51	MF588689	Gammapapillomavirus	Gammapapillomavirus 22	Gamma-HPV	Yes	No	7191	223	325	Group 1	Group 1	Group 1	Homo sapiens	human being	HPVmSK044	6783	36.0094	1.42626	97	0.469175	0.385766	0.427471	0.217135	43.52	46.1445	1.06289	0.935468	1.10265	0.918532	1.13966	1.12942	0.44457	1.00311	0.98997	0.859411
2018#	HPVmSK145	MH777287	Gammapapillomavirus	Gammapapillomavirus 22	Gamma-HPV	Yes	No	7215	224	324	Group 1	Group 1	Group 1	Homo sapiens	human being	HPVmSK174	6795	35.7992	1.79982	108	0.482836	0.400181	0.441509	0.227642	44.49	46.9833	1.07402	0.922179	1.05884	0.937104	1.14059	1.14758	0.50006	0.99115	1.01864	0.85295
2018#	HPVmSK217	MH777356	Gammapapillomavirus	Gammapapillomavirus 22	Gamma-HPV	Yes	No	7303	225	323	Group 1	Group 1	Group 1	Homo sapiens	human being		6792	36.1968	1.71278	94	0.475328	0.40335	0.439339	0.215482	43.61	45.9919	1.06917	0.928311	1.06311	0.937724	1.17628	1.15663	0.425473	0.955015	1.05916	0.858133
2018#	HPVmSK107	MH777249	Gammapapillomavirus	Gammapapillomavirus 22	Gamma-HPV	Yes	No	7260	226	322	Group 1	Group 1	Group 1	Homo sapiens	human being		6801	36.7209	1.56758	105	0.472868	0.401277	0.437073	0.205654	43.18	45.3048	1.05109	0.907537	1.08551	0.954118	1.16882	1.10496	0.461752	0.963075	1.13019	0.873385
2018#	HPVmSK190	MH777332	Gammapapillomavirus	Gammapapillomavirus 22	Gamma-HPV	Yes	No	7312	227	337	Group 1	Group 1	Group 1	Homo sapiens	human being		6831	35.1	1.81925	95	0.492951	0.401091	0.447021	0.262847	46.66	49.6225	1.07737	0.933216	1.08961	0.912597	1.15498	1.09741	0.457179	0.990901	1.05873	0.845822
2018#	HPVw07c34d	MF588753	Gammapapillomavirus	Gammapapillomavirus 22	Gamma-HPV	Yes	No	7350	228	338	Group 1	Group 1	Group 1	Homo sapiens	human being		6834	35.8727	1.19673	82	0.466817	0.386907	0.426862	0.213544	42.29	45.9156	1.06894	0.94782	1.10135	0.90602	1.18255	1.1205	0.37702	0.955433	1.06669	0.85616
2018#	HPVw34c34a	MF588731	Gammapapillomavirus	Gammapapillomavirus 22	Gamma-HPV	Yes	No	7236	229	334	Group 1	Group 1	Group 1	Homo sapiens	human being	HPVmSK157	6774	36.0866	1.35453	92	0.470642	0.392808	0.431725	0.211197	41.84	45.6865	1.09354	0.951154	1.13372	0.859927	1.15288	1.07634	0.420125	0.990732	1.03661	0.826686
2018#	HPVmSK172	MH777314	Gammapapillomavirus	Gammapapillomavirus 22	Gamma-HPV	Yes	No	7219	230	335	Group 1	Group 1	Group 1	Homo sapiens	human being		6783	35.9653	1.66519	106	0.491788	0.401916	0.446852	0.237226	44.37	47.6675	1.10015	0.918094	1.09686	0.893896	1.139	1.09809	0.485694	1.01131	1.03554	0.817605
2018#	HPVmSK049	MH777194	Gammapapillomavirus	Gammapapillomavirus 22	Gamma-HPV	Yes	No	7232	231	331	Group 1	Group 1	Group 1	Homo sapiens	human being		6780	35.5987	1.85185	105	0.491957	0.396336	0.444147	0.236819	45.08	47.6675	1.07183	0.936791	1.03175	0.947993	1.1973	1.0981	0.49205	0.999672	1.02628	0.821309
2018#	HPVmSK045	MH972558	Gammapapillomavirus	Gammapapillomavirus 22	Gamma-HPV	Yes	No	7263	232	341	Group 1	Group 1	Group 1	Homo sapiens	human being		6840	35.9434	1.62918	107	0.479769	0.412183	0.445976	0.236105	45.07	47.5916	1.08671	0.956305	1.0741	0.899147	1.15897	1.10157	0.485458	0.977837	1.02082	0.839204
2018#	HPVmSK171	MH777313	Gammapapillomavirus	Gammapapillomavirus 22	Gamma-HPV	Yes	No	7275	233	339	Group 1	Group 1	Group 1	Homo sapiens	human being		6822	36.462	1.55859	98	0.470428	0.38626	0.428344	0.214286	43	45.9156	1.10742	0.92387	1.08795	0.888449	1.17503	1.11067	0.432473	0.960472	1.09442	0.817199
2018#	HPVmSK058	MH777203	Gammapapillomavirus	Gammapapillomavirus 22	Gamma-HPV	Yes	No	7229	234	336	Group 1	Group 1	Group 1	Homo sapiens	human being		6777	35.5703	1.65837	93	0.478669	0.374121	0.426395	0.261603	46.29	49.5481	1.09475	0.924697	1.0878	0.900436	1.16871	1.10267	0.438038	1.00304	1.04093	0.812241
2013	HPV156	JX429973	Gammapapillomavirus	Gammapapillomavirus 18	Gamma-HPV	Yes	Yes	7329	235	320	Group 1	Group 1	Group 1	Homo sapiens	human being	GC01	6912	36.1328	1.22655	85	0.473637	0.39857	0.436104	0.202413	42.14	44.9996	1.0818	0.956707	1.09928	0.887779	1.20307	1.08979	0.379884	1.01298	0.974291	0.797016
2018#	HPVmSK013	MH777161	Gammapapillomavirus	Gammapapillomavirus 10	Gamma-HPV	Yes	No	7351	236	261	Group 1	Group 1	Group 1	Homo sapiens	human being		6843	36.3795	1.5349	71	0.456415	0.408136	0.432275	0.21949	43.93	46.2972	1.07957	0.944604	1.14486	0.871717	1.18768	1.10569	0.316412	0.969794	1.05619	0.832685
2015	HPV180	KC108722	Gammapapillomavirus	Gammapapillomavirus 10	Gamma-HPV	Yes	Yes	7356	237	262	Group 1	Group 1	Group 1	Homo sapiens	human being	FA69,FA69	6849	36.3186	1.09218	75	0.476061	0.399277	0.437669	0.205059	40.95	45.2285	1.06005	0.918013	1.11698	0.922517	1.17491	1.15701	0.33568	0.983495	1.02942	0.851886
2013	HPV142	HM999994	Gammapapillomavirus	Gammapapillomavirus 10	Gamma-HPV	Yes	Yes	7374	238	259	Group 1	Group 1	Group 1	Homo sapiens	human being	FA67,GH1302	6870	37.0499	1.21951	84	0.48248	0.403414	0.442947	0.216981	42.77	46.1445	1.05733	0.917531	1.10427	0.932613	1.19391	1.138	0.359032	0.964839	1.07282	0.851708
2018#	HPVmSK010	MH777158	Gammapapillomavirus	Gammapapillomavirus 10	Gamma-HPV	Yes	No	7466	239	266	Group 1	Group 1	Group 1	Homo sapiens	human being		6675	36.7249	2.05984	82	0.503941	0.389893	0.446917	0.2828	49.07	51.0899	1.05161	0.951584	1.11618	0.912262	1.18305	1.12108	0.368271	0.940011	1.07787	0.879307
2013	HPV133	GU117633	Gammapapillomavirus	Gammapapillomavirus 10	Gamma-HPV	Yes	Yes	7358	240	264	Group 1	Group 1	Group 1	Homo sapiens	human being	FA44	6852	37.0742	1.20815	83	0.487122	0.400813	0.443967	0.215996	41.99	46.0682	1.05504	0.928422	1.12808	0.914016	1.20795	1.07807	0.356176	0.974594	1.09857	0.838831
2013	HPV130	GU117630	Gammapapillomavirus	Gammapapillomavirus 10	Gamma-HPV	Yes	Yes	7388	241	265	Group 1	Group 1	Group 1	Homo sapiens	human being	FA147	6867	36.9789	1.24909	86	0.476791	0.39342	0.435106	0.230284	43.41	47.1355	1.09125	0.909932	1.11311	0.898896	1.18665	1.12376	0.371097	0.959791	1.11329	0.825457
2015	HPV191	KR816178	Gammapapillomavirus	Gammapapillomavirus 10	Gamma-HPV	Yes	Yes	7364	242	258	Group 1	Group 1	Group 1	Homo sapiens	human being	FA90,HIVGc70,HPVmSK047	6867	37.3711	1.14742	79	0.488058	0.401532	0.444795	0.222172	43.03	46.526	1.06348	0.896092	1.10708	0.937196	1.21134	1.13774	0.332774	0.976765	1.08678	0.825802
2018#	HPVmSK121	MH777263	Gammapapillomavirus	Gammapapillomavirus 9	Gamma-HPV	Yes	No	7241	243	393	Group 1	Group 1	Group 1	Homo sapiens	human being		6810	37.273	1.51781	102	0.473493	0.389669	0.431581	0.243317	44.92	48.122	1.03328	0.92959	1.13505	0.931186	1.15384	1.0837	0.43519	0.970933	1.09651	0.895314
2010	HPV121	GQ845443	Gammapapillomavirus	Gammapapillomavirus 10	Gamma-HPV	Yes	Yes	7342	244	263	Group 1	Group 1	Group 1	Homo sapiens	human being		6828	37.7301	1.28542	88	0.484615	0.397738	0.441176	0.241629	44.51	48.0463	1.06006	0.938802	1.08056	0.93165	1.19744	1.18001	0.365266	0.932585	1.04184	0.863592
2018#	HPV221	MH172378	Gammapapillomavirus	Gammapapillomavirus 10	Gamma-HPV	Yes	Yes	7326	245	260	Group 1	Group 1	Group 1	Homo sapiens	human being		6861	38.6393	1.57678	100	0.48833	0.402746	0.445538	0.22151	43.22	46.526	1.05713	0.897627	1.10241	0.944433	1.16986	1.17815	0.394565	0.920926	1.12451	0.887147
2018#	HPV203	MG921180	Gammapapillomavirus	Gammapapillomavirus 7	Gamma-HPV	Yes	Yes	7372	246	256	Group 1	Group 1	Group 1	Homo sapiens	human being	HPVmSK074,SE369	6900	37.453	1.04076	72	0.488839	0.408036	0.448437	0.220982	42.61	46.4498	1.05306	0.965079	1.10947	0.903922	1.25386	1.09645	0.300953	0.981123	1.00736	0.807602
2018#	HPVw20c02c	MF588702	Gammapapillomavirus	Gammapapillomavirus 7	Gamma-HPV	Yes	No	7366	247	255	Group 1	Group 1	Group 1	Homo sapiens	human being	HPVmSK184	6900	37.771	1.12749	78	0.482143	0.411607	0.446875	0.233482	43.6	47.3637	1.05713	0.928635	1.13281	0.906886	1.22383	1.0963	0.319875	0.977834	1.07035	0.821585
2018#	HPVmSK131	MH777273	Gammapapillomavirus	Gammapapillomavirus 7	Gamma-HPV	Yes	No	7466	248	254	Group 1	Group 1	Group 1	Homo sapiens	human being		6717	37.5501	1.37972	86	0.473947	0.374264	0.424105	0.199366	41.85	44.7708	1.06295	0.964949	1.08272	0.909558	1.24861	1.08672	0.36677	0.968748	1.03634	0.807309
2018#	HPVw18c11d	MF588733	Gammapapillomavirus	Gammapapillomavirus 19	Gamma-HPV	Yes	No	7282	249	493	Group 1	Group 1	Group 1	Homo sapiens	human being	HPVmSK124,HPVmSK141	6777	37.454	1.4128	96	0.494968	0.401189	0.448079	0.217749	43.43	46.2209	1.05109	0.938563	1.08682	0.935244	1.2087	1.10365	0.407611	0.980025	1.0445	0.837194
2018#	HPVw11C24	MF588709	Gammapapillomavirus	Gammapapillomavirus 9	Gamma-HPV	Yes	No	7256	250	405	Group 1	Group 1	Group 1	Homo sapiens	human being	,HPVmSK036,FA49	6744	37.7255	1.49364	101	0.469108	0.405034	0.437071	0.250801	44.87	48.7252	1.08299	0.920295	1.05878	0.930498	1.22622	1.10975	0.423448	0.966876	1.08587	0.800626
2018#	HPVmSK025	MH777173	Mupapillomavirus	Mupapillomavirus 3	Mu/Nu-HPV	Yes	No	6754	251	552	Group 1	Group 1	Group 1	Homo sapiens	human being		6291	37.2167	1.87009	81	0.515031	0.425287	0.470159	0.261273	46.73	49.4737	1.07687	0.946985	1.10843	0.893008	1.23868	1.04366	0.376762	0.944271	1.15819	0.817111
2018#	HPVd01c06	MF588757	Mupapillomavirus	Mupapillomavirus 3	Mu/Nu-HPV	Yes	No	7203	252	553	Group 1	Group 1	Group 1	Homo sapiens	human being	HPVmSK042	6723	36.8491	1.27137	98	0.476341	0.401532	0.438936	0.221271	43.8	46.4498	1.06014	0.953676	1.06715	0.930466	1.21887	1.08157	0.433228	0.9728	1.05654	0.8304
2017	HPV204	KP769769	Mupapillomavirus	Mupapillomavirus 3	Mu/Nu-HPV	Yes	No	7227	253	551	Group 1	Group 1	Group 1	Homo sapiens	human being		6726	37.7224	1.33452	90	0.483043	0.406049	0.444546	0.235564	43.88	47.5916	1.06512	0.946765	1.10835	0.90373	1.2106	1.09831	0.379471	0.955602	1.07517	0.836218
2018#	HPVmSK055	MH777200	Gammapapillomavirus	Gammapapillomavirus 12	Gamma-HPV	Yes	No	7121	254	440	Group 1	Group 1	Group 1	Homo sapiens	human being		6717	36.9562	1.64392	93	0.501592	0.403365	0.452478	0.228286	44.51	46.9833	1.05572	0.973769	1.05024	0.932002	1.26055	1.0654	0.40864	0.934258	1.10289	0.831609
2015	HPV172	KF006399	Gammapapillomavirus	Gammapapillomavirus 22	Gamma-HPV	Yes	Yes	7203	255	365	Group 1	Group 1	Group 1	Homo sapiens	human being		6810	37.7306	1.80088	123	0.477848	0.405967	0.441908	0.240054	45.45	47.8949	1.02858	0.992097	1.07311	0.934139	1.18902	1.06138	0.508516	0.989604	0.971555	0.865898
2018#	HPVmSK241	MH777380	Gammapapillomavirus	Gammapapillomavirus 22	Gamma-HPV	Yes	No	7273	256	346	Group 1	Group 1	Group 1	Homo sapiens	human being		6828	36.8244	1.69072	99	0.489888	0.392809	0.441348	0.225618	44.93	46.831	1.06722	0.955636	1.06112	0.925502	1.18042	1.15905	0.429406	0.914196	1.07135	0.879962
2018#	HPVmSK028	MH777176	Gammapapillomavirus	Gammapapillomavirus 22	Gamma-HPV	Yes	No	7320	257	348	Group 1	Group 1	Group 1	Homo sapiens	human being		6771	38.2089	1.38767	112	0.481247	0.386353	0.4338	0.232264	45.01	47.2877	1.06321	0.940817	1.06809	0.933143	1.17789	1.15019	0.45391	0.953295	1.02535	0.857315
2018#	HPVTVMBSHc13	MF588738	Gammapapillomavirus	Gammapapillomavirus 22	Gamma-HPV	Yes	No	7309	258	353	Group 1	Group 1	Group 1	Homo sapiens	human being	HPVmSK035	6843	37.5164	1.69072	116	0.480379	0.406405	0.443392	0.230041	44.4	47.1355	1.06695	0.974926	1.01721	0.940801	1.18259	1.18674	0.482909	0.947568	0.945002	0.856908
2018#	HPVEV06c118	MF588736	Gammapapillomavirus	Gammapapillomavirus 22	Gamma-HPV	Yes	No	7237	259	347	Group 1	Group 1	Group 1	Homo sapiens	human being		6801	38.3634	2.88504	112	0.561549	0.454126	0.507838	0.412172	52.8	58.6694	1.10014	0.951369	1.03695	0.90925	1.22053	1.13991	0.448971	0.936484	1.04626	0.803919
2018#	HPVmSK061	MH777206	Gammapapillomavirus	Gammapapillomavirus 11	Gamma-HPV	Yes	No	7399	260	391	Group 1	Group 1	Group 1	Homo sapiens	human being		6615	37.3436	1.31984	110	0.46388	0.393912	0.428896	0.199455	42.05	44.7708	1.08064	0.947165	1.02964	0.93723	1.20876	1.12432	0.478286	0.93299	1.08267	0.838412
2015	HPV192	KR816179	Gammapapillomavirus	Gammapapillomavirus 15	Gamma-HPV	Yes	Yes	7244	261	419	Group 1	Group 1	Group 1	Homo sapiens	human being	HPVmSK243,SE8	6804	36.2504	1.40721	96	0.479564	0.39782	0.438692	0.201635	42.92	44.9996	1.03951	0.934966	1.0669	0.962147	1.21406	1.07756	0.430916	1.00474	1.0324	0.837719
2018#	HPVwg1c09	MF588727	Gammapapillomavirus	Gammapapillomavirus 15	Gamma-HPV	Yes	No	7221	262	421	Group 1	Group 1	Group 1	Homo sapiens	human being	HPVmSK203	6783	36.7005	1.54389	105	0.475649	0.39645	0.436049	0.222121	43.95	46.526	1.0209	0.931672	1.06459	0.982233	1.2051	1.07637	0.460837	1.01142	1.02701	0.854307
2015	HPV167	KC862318	Gammapapillomavirus	Gammapapillomavirus 21	Gamma-HPV	Yes	Yes	7228	263	504	Group 1	Group 1	Group 1	Homo sapiens	human being	KC10,SE120,KC134	6777	35.9382	1.36865	93	0.466364	0.385455	0.425909	0.217727	42.87	46.2209	1.09445	0.887247	1.10714	0.910283	1.16467	1.0916	0.428514	0.980574	1.15653	0.825438
2018#	HPVmSK128	MH777270	Gammapapillomavirus	Gammapapillomavirus 21	Gamma-HPV	Yes	No	7230	264	506	Group 1	Group 1	Group 1	Homo sapiens	human being		6771	36.4708	1.27691	97	0.488308	0.408528	0.448418	0.223292	42.5	46.6023	1.08467	0.888757	1.09473	0.927273	1.18119	1.08968	0.433543	0.993017	1.12632	0.817406
2018#	HPVmSK137	MH777279	Gammapapillomavirus	Gammapapillomavirus 15	Gamma-HPV	Yes	No	7256	265	420	Group 1	Group 1	Group 1	Homo sapiens	human being	HPVCGG5301s0532c000007	6792	36.0352	2.03144	100	0.491043	0.404685	0.447864	0.216353	44.19	46.0682	1.06808	0.904634	1.08684	0.938857	1.19004	1.0562	0.45548	1.01548	1.09315	0.8179
2018#	HPVmSK101	MH972562	Gammapapillomavirus	Gammapapillomavirus 12	Gamma-HPV	Yes	No	7233	266	458	Group 1	Group 1	Group 1	Homo sapiens	human being		6714	36.2002	1.57387	102	0.480221	0.404784	0.442502	0.218031	43.46	46.2209	1.08751	0.923591	1.07281	0.915538	1.19758	1.06098	0.465648	0.973759	1.1276	0.816086
2018#	HPVmSK023	MH777171	Gammapapillomavirus	Gammapapillomavirus 22	Gamma-HPV	Yes	No	7247	267	333	Group 1	Group 1	Group 1	Homo sapiens	human being		6786	35.729	1.28388	83	0.48308	0.40412	0.4436	0.222168	42.58	46.526	1.08448	0.905001	1.07909	0.926064	1.19685	1.12138	0.386489	0.986925	1.08496	0.814765
2018#	HPVmSK186	MH777328	Gammapapillomavirus	Gammapapillomavirus 16	Gamma-HPV	Yes	No	7407	268	370	Group 1	Group 1	Group 1	Homo sapiens	human being		6810	35.7938	2.09254	93	0.513008	0.400274	0.456641	0.265176	47.85	49.7709	1.0729	0.911293	1.06551	0.942239	1.19551	1.10654	0.428908	0.982666	1.09302	0.829627
2018#	HPVw27c04c	MF588728	Gammapapillomavirus	Gammapapillomavirus 16	Gamma-HPV	Yes	No	7209	269	371	Group 1	Group 1	Group 1	Homo sapiens	human being	HPVmSK018	6810	36.5847	1.36204	93	0.468849	0.395634	0.432242	0.224193	42.95	46.6785	1.06851	0.912812	1.08704	0.933813	1.21456	1.07016	0.409274	0.992352	1.1002	0.813981
2018#	HPVmSK085	MH777228	Gammapapillomavirus	Gammapapillomavirus 16	Gamma-HPV	Yes	No	7258	270	369	Group 1	Group 1	Group 1	Homo sapiens	human being		6732	37.0222	1.44033	94	0.480236	0.395729	0.437983	0.263517	45.46	49.6967	1.07127	0.921328	1.09034	0.926085	1.20217	1.096	0.409609	0.978514	1.08067	0.825521
2018#	HPVw18c134	MF588725	Gammapapillomavirus	Gammapapillomavirus 15	Gamma-HPV	Yes	No	7262	271	416	Group 1	Group 1	Group 1	Homo sapiens	human being	HPVmSK195,F023	6804	36.0891	1.3046	89	0.472991	0.391739	0.432365	0.210168	43	45.6102	1.03929	0.8961	1.10074	0.964897	1.19226	1.08046	0.404013	1.02321	1.07132	0.841045
2018#	HPVmSK029	MH777177	Gammapapillomavirus	Gammapapillomavirus 16	Gamma-HPV	Yes	No	7229	272	374	Group 1	Group 1	Group 1	Homo sapiens	human being		6828	36.8975	1.74567	95	0.476168	0.407009	0.441589	0.233178	45.12	47.3637	1.07702	0.905914	1.10291	0.918751	1.17568	1.11584	0.410715	0.983707	1.08083	0.830551
2018#	HPVmSK122	MH777264	Gammapapillomavirus	Gammapapillomavirus 16	Gamma-HPV	Yes	No	7231	273	372	Group 1	Group 1	Group 1	Homo sapiens	human being		6834	37.1278	1.59172	104	0.486654	0.401335	0.443994	0.241659	45.5	48.0463	1.05961	0.884044	1.09161	0.956209	1.18039	1.09896	0.444253	0.99033	1.12345	0.840753
2018#	HPVEV03c104	MF588724	Gammapapillomavirus	Gammapapillomavirus 15	Gamma-HPV	Yes	No	7272	274	425	Group 1	Group 1	Group 1	Homo sapiens	human being	HPVmSK134	6825	35.9053	1.24433	91	0.479091	0.400455	0.439773	0.211818	42.78	45.7629	1.07143	0.909318	1.09347	0.928113	1.17983	1.09953	0.415973	1.00584	1.0605	0.825464
2013	HPV146	HM999998	Gammapapillomavirus	Gammapapillomavirus 15	Gamma-HPV	Yes	Yes	7265	275	426	Group 1	Group 1	Group 1	Homo sapiens	human being	FA35,CG1,GH1677	6807	36.0879	1.40659	96	0.47718	0.397198	0.437189	0.200181	43.46	44.8471	1.08327	0.928752	1.07105	0.918654	1.19429	1.09805	0.435035	0.964327	1.09665	0.828083
2018#	HPVmSK185	MH777327	Gammapapillomavirus	Gammapapillomavirus 18	Gamma-HPV	Yes	No	7422	276	318	Group 1	Group 1	Group 1	Homo sapiens	human being		6831	36.4141	1.36204	106	0.455	0.396364	0.425682	0.214091	41.88	45.9156	1.06241	0.926958	1.08965	0.92872	1.1628	1.09231	0.470403	0.992538	1.05619	0.849157
2018#	HPVSD2R	KC113191	Gammapapillomavirus	Gammapapillomavirus 15	Gamma-HPV	Yes	No	7299	277	423	Group 1	Group 1	Group 1	Homo sapiens	human being	HPVmSK175	6255	36.1625	1.33374	88	0.348907	0.430915	0.389911	0.308151	47.24	52.8546	1.08076	0.937523	1.13185	0.881138	1.15943	1.07784	0.410961	0.965097	1.10212	0.849828
2018#	HPVw20c10a	MF588726	Gammapapillomavirus	Gammapapillomavirus 15	Gamma-HPV	Yes	No	7262	278	424	Group 1	Group 1	Group 1	Homo sapiens	human being	HPVmSK233	6807	36.3956	1.4652	100	0.484821	0.391935	0.438378	0.207975	43.32	45.4575	1.04308	0.954471	1.06334	0.949823	1.18486	1.12381	0.446008	0.98232	0.994597	0.864004
2018#	HPVmSK015	MH777163	Gammapapillomavirus	Gammapapillomavirus 15	Gamma-HPV	Yes	No	7244	279	418	Group 1	Group 1	Group 1	Homo sapiens	human being		6819	36.4487	1.7094	103	0.483768	0.406036	0.444902	0.229081	43.96	47.0594	1.0582	0.940836	1.06333	0.940741	1.2073	1.07453	0.456776	0.971145	1.08651	0.840569
2018#	HPVmSK037	MH777185	Gammapapillomavirus	Gammapapillomavirus 13	Gamma-HPV	Yes	No	7247	280	435	Group 1	Group 1	Group 1	Homo sapiens	human being		6771	36.677	1.76062	106	0.48312	0.392792	0.437956	0.225821	45.19	46.831	1.06603	0.94118	1.08325	0.922971	1.18218	1.07746	0.467472	0.962744	1.09371	0.8522
2015	HPV179	HG421739	Gammapapillomavirus	Gammapapillomavirus 15	Gamma-HPV	Yes	Yes	7228	281	428	Group 1	Group 1	Group 1	Homo sapiens	human being	SIBX16	6771	36.839	1.60554	109	0.479053	0.402095	0.440574	0.218124	43.59	46.2209	1.0464	0.911591	1.05846	0.972493	1.20026	1.0832	0.47655	0.969831	1.12798	0.855557
2018#	HPVmSK167	MH777309	Gammapapillomavirus	Gammapapillomavirus 11	Gamma-HPV	Yes	No	7335	282	392	Group 1	Group 1	Group 1	Homo sapiens	human being		6807	36.9377	1.37962	108	0.471534	0.397153	0.434343	0.243343	45.05	48.122	1.06993	0.927161	1.07812	0.929631	1.18757	1.08247	0.467643	0.949805	1.13447	0.8513
2013	HPV135	HM999987	Gammapapillomavirus	Gammapapillomavirus 15	Gamma-HPV	Yes	Yes	7293	283	427	Group 1	Group 1	Group 1	Homo sapiens	human being	FA28,NJ3500	6792	36.8576	1.39501	95	0.486609	0.403087	0.444848	0.208806	43.21	45.5338	1.06367	0.952756	1.07138	0.924618	1.21019	1.10688	0.413541	0.976733	1.01862	0.828611
2018#	HPVTVMBSHc33	MF588707	Gammapapillomavirus	Gammapapillomavirus 8	Gamma-HPV	Yes	No	7243	284	513	Group 1	Group 1	Group 1	Homo sapiens	human being	HPVmSK230	6834	37.6241	1.48862	102	0.484206	0.406137	0.445171	0.231047	44.33	47.2116	1.07429	0.955193	1.05345	0.922956	1.22508	1.11759	0.422795	0.937781	1.06528	0.829607
2015	HPV199	KJ913662	Gammapapillomavirus	Gammapapillomavirus 12	Gamma-HPV	Yes	Yes	7184	285	465	Group 1	Group 1	Group 1	Homo sapiens	human being	KC82	6732	36.5037	1.46667	99	0.47547	0.40486	0.440165	0.207244	42.4	45.3812	1.08472	0.947238	1.07635	0.901697	1.19907	1.08066	0.443806	0.931898	1.13865	0.839917
2018#	HPVmSK205	MH777346	Gammapapillomavirus	Gammapapillomavirus 12	Gamma-HPV	Yes	No	7211	286	464	Group 1	Group 1	Group 1	Homo sapiens	human being		6729	36.431	2.00501	101	0.486314	0.404653	0.445484	0.235858	44.71	47.5916	1.05924	0.925425	1.08414	0.935826	1.18782	1.07429	0.454603	0.970224	1.11625	0.850618
2013	HPV127	HM011570	Gammapapillomavirus	Gammapapillomavirus 12	Gamma-HPV	Yes	Yes	7181	287	467	Group 1	Group 1	Group 1	Homo sapiens	human being	R3a	6786	37.0958	1.51382	103	0.476644	0.404989	0.440816	0.224036	42.55	46.6785	1.09572	0.932165	1.08081	0.897271	1.1841	1.11076	0.445201	0.95232	1.09787	0.824359
2018#	HPVmSK204	MH777345	Gammapapillomavirus	Gammapapillomavirus 12	Gamma-HPV	Yes	No	7184	288	466	Group 1	Group 1	Group 1	Homo sapiens	human being		6813	37.3005	1.49696	110	0.471776	0.397889	0.434832	0.215695	43.46	46.0682	1.10523	0.905118	1.04783	0.922854	1.1893	1.13845	0.467098	0.951438	1.11254	0.811038
2018#	HPVmSK229	MH777368	Gammapapillomavirus	Gammapapillomavirus 15	Gamma-HPV	Yes	No	7257	289	417	Group 1	Group 1	Group 1	Homo sapiens	human being		6795	36.6505	1.92534	95	0.491156	0.400907	0.446032	0.220408	44.1	46.3735	1.09503	0.891369	1.07849	0.923103	1.19229	1.11674	0.418445	0.96723	1.13641	0.81321
2018#	HPVmSK250	MH777389	Gammapapillomavirus	Gammapapillomavirus	Gamma-HPV	Yes	No	7193	290	507	Group 1	Group 1	Group 1	Homo sapiens	human being		6828	37.0874	2.24873	121	0.516088	0.431414	0.473751	0.339966	52.43	54.9525	1.08796	0.924029	1.04673	0.93025	1.17695	1.10657	0.518588	0.93655	1.14004	0.845951
2018#	HPVga2c70	MF588754	Gammapapillomavirus	Gammapapillomavirus 28	Gamma-HPV	Yes	No	7270	291	485	Group 1	Group 1	Group 1	Homo sapiens	human being	HPVmSK247	6816	37.0939	1.83694	105	0.495417	0.415103	0.45526	0.27368	47.07	50.4346	1.09898	0.889213	1.0648	0.928871	1.1852	1.12939	0.450261	0.964464	1.1278	0.813317
2018#	HPVmSK096	MH777239	Gammapapillomavirus	Gammapapillomavirus 19	Gamma-HPV	Yes	No	7255	292	495	Group 1	Group 1	Group 1	Homo sapiens	human being		6816	36.4794	2.03484	95	0.477828	0.413122	0.445475	0.242081	45.29	48.0463	1.08869	0.909338	1.05711	0.931543	1.17204	1.18316	0.423616	0.981327	1.02114	0.824001
2018#	HPVmSK239	MH777378	Gammapapillomavirus	Gammapapillomavirus 19	Gamma-HPV	Yes	No	7240	293	494	Group 1	Group 1	Group 1	Homo sapiens	human being		6768	36.3837	1.4461	105	0.462687	0.404342	0.433514	0.229308	43.79	47.0594	1.08363	0.926984	1.05941	0.925118	1.1651	1.13991	0.473329	0.98683	1.02329	0.830272
2015	HPV184	HG530535	Gammapapillomavirus	Gammapapillomavirus 25	Gamma-HPV	Yes	Yes	7324	294	308	Group 1	Group 1	Group 1	Homo sapiens	human being	SIBX17	6858	37.1437	1.65794	114	0.479693	0.401625	0.440659	0.226083	43.26	46.831	1.0881	0.946834	1.0602	0.907872	1.17233	1.12581	0.485259	0.971751	1.0216	0.826812
2018#	HPVmSK008	MH777156	Gammapapillomavirus	Gammapapillomavirus 12	Gamma-HPV	Yes	No	7260	295	459	Group 1	Group 1	Group 1	Homo sapiens	human being		6813	37.0078	1.22516	103	0.476146	0.397406	0.436776	0.219546	42.12	46.3735	1.07801	0.963299	1.07257	0.900536	1.21197	1.0753	0.443679	0.951996	1.07689	0.825245
2018#	HPV222	MH172379	Gammapapillomavirus	Gammapapillomavirus 19	Gamma-HPV	Yes	Yes	7275	296	492	Group 1	Group 1	Group 1	Homo sapiens	human being	HPVmSK110	6768	37.4005	1.82936	107	0.463282	0.411151	0.437217	0.224388	44.86	46.6785	1.08979	0.960489	1.06623	0.895478	1.18204	1.13356	0.455241	0.942865	1.03812	0.836684
2018#	HPVwg1c05	MF588756	Gammapapillomavirus	Gammapapillomavirus 22	Gamma-HPV	Yes	No	7230	297	343	Group 1	Group 1	Group 1	Homo sapiens	human being	HPVmSK248	6837	36.3676	1.5609	107	0.464687	0.405308	0.434998	0.212326	43.09	45.7629	1.07218	0.984647	1.05651	0.907312	1.18385	1.10738	0.477383	0.963214	0.99492	0.846536
2018#	HPVw18c07	MF588740	Gammapapillomavirus	Gammapapillomavirus 22	Gamma-HPV	Yes	No	7226	298	364	Group 1	Group 1	Group 1	Homo sapiens	human being	HPVmSK003	6798	36.6637	1.40845	96	0.467269	0.398194	0.432731	0.226637	44.61	46.9071	1.05039	0.961603	1.05764	0.942509	1.21053	1.11763	0.422006	0.950231	1.04183	0.860168
2018#	HPVmSK012	MH777160	Gammapapillomavirus	Gammapapillomavirus 22	Gamma-HPV	Yes	No	7312	299	345	Group 1	Group 1	Group 1	Homo sapiens	human being		6840	36.585	1.03483	96	0.469471	0.400724	0.435097	0.211669	40.88	45.7629	1.07762	0.985493	1.06594	0.894958	1.19541	1.12864	0.422704	0.93647	1.01713	0.848391
2018#	HPVmSK199	MH972563	Gammapapillomavirus	Gammapapillomavirus 22	Gamma-HPV	Yes	No	7306	300	344	Group 1	Group 1	Group 1	Homo sapiens	human being		6825	37.0013	1.52187	106	0.484696	0.402467	0.443582	0.223847	44.34	46.6785	1.06559	0.95541	1.06449	0.925073	1.17483	1.13996	0.457317	0.947887	1.03544	0.864485
2018#	HPVdo1c02	MF588734	Gammapapillomavirus	Gammapapillomavirus 22	Gamma-HPV	Yes	No	7214	301	367	Group 1	Group 1	Group 1	Homo sapiens	human being	HPVmSK059	6825	36.9282	1.95563	87	0.48673	0.405758	0.446244	0.224471	44.02	46.6785	1.07781	0.957446	1.09422	0.894746	1.22222	1.08661	0.37539	0.911017	1.14343	0.846103
2018#	HPVFi864	KC311731	Gammapapillomavirus	Gammapapillomavirus 22	Gamma-HPV	Yes	No	7247	302	356	Group 1	Group 1	Group 1	Homo sapiens	human being		6759	36.8895	1.80537	91	0.484047	0.412489	0.448268	0.232908	45.48	47.3637	1.03511	0.950713	1.11677	0.928657	1.18649	1.08649	0.397773	0.94691	1.09715	0.889963
2015	HPV173	KF006400	Gammapapillomavirus	Gammapapillomavirus 1	Gamma-HPV	Yes	Yes	7297	303	276	Group 1	Group 1	Group 1	Homo sapiens	human being	FA9	6813	36.6857	1.55175	106	0.468297	0.408514	0.438406	0.216033	42.92	46.0682	1.07291	0.946645	1.06765	0.922266	1.17984	1.11166	0.464155	0.944124	1.08157	0.857751
2018#	HPVEV03c212	MF588735	Gammapapillomavirus	Gammapapillomavirus 22	Gamma-HPV	Yes	No	7231	304	355	Group 1	Group 1	Group 1	Homo sapiens	human being	HPVmSK198	6813	36.6857	1.97703	114	0.512809	0.400449	0.456629	0.274157	48.49	50.4346	1.05903	0.941603	1.09539	0.921909	1.15337	1.07468	0.498813	0.966813	1.08951	0.873541
2018#	HPVmSK080	MH777224	Gammapapillomavirus	Gammapapillomavirus	Gamma-HPV	Yes	No	7272	305	512	Group 1	Group 1	Group 1	Homo sapiens	human being		6825	36.9136	1.39259	111	0.485701	0.403598	0.444649	0.213561	42.78	45.9156	1.05602	0.958858	1.0944	0.915428	1.16343	1.08318	0.478137	0.947563	1.08119	0.881524
2018#	HPVDysk6	KX781285	Gammapapillomavirus	Gammapapillomavirus 22	Gamma-HPV	Yes	No	7271	306	354	Group 1	Group 1	Group 1	Homo sapiens	human being	HPVmSK177	6837	37.2721	1.57343	106	0.488101	0.407723	0.447912	0.224966	45.39	46.7548	1.04401	1.0108	1.07444	0.907876	1.2167	1.06479	0.447336	0.923442	1.05082	0.875133
2015	HPV176	KR816167	Gammapapillomavirus	Gammapapillomavirus 8	Gamma-HPV	Yes	Yes	7226	307	518	Group 1	Group 1	Group 1	Homo sapiens	human being	HPVmSK009,FA160	6819	37.0045	1.55039	106	0.473803	0.405149	0.439476	0.223577	44.46	46.6785	1.08137	0.961234	1.0679	0.902627	1.20844	1.07668	0.45499	0.948685	1.08168	0.827285
2017	HPV205	KT698167	Gammapapillomavirus	Gammapapillomavirus 1	Gamma-HPV	Yes	Yes	7298	308	275	Group 1	Group 1	Group 1	Homo sapiens	human being	EP01	6822	37.4123	1.40351	96	0.475373	0.409851	0.442612	0.230456	44.18	47.1355	1.07264	0.954034	1.06767	0.915317	1.19754	1.15524	0.404109	0.921567	1.06078	0.856988
2018#	HPVmSK051	MH777196	Gammapapillomavirus	Gammapapillomavirus 22	Gamma-HPV	Yes	No	7341	309	366	Group 1	Group 1	Group 1	Homo sapiens	human being		6939	37.2287	1.62314	94	0.481007	0.406865	0.443936	0.241648	44.82	48.0463	1.03822	0.938628	1.09978	0.941477	1.16744	1.15948	0.391483	0.957081	1.02035	0.890231
2015	HPV181	KR816169	Gammapapillomavirus	Gammapapillomavirus 11	Gamma-HPV	Yes	Yes	7240	310	385	Group 1	Group 1	Group 1	Homo sapiens	human being	FA95	6762	37.6991	1.35693	92	0.470132	0.392157	0.431145	0.261742	45.77	49.5481	1.0678	0.95076	1.09394	0.907133	1.21577	1.10628	0.383767	0.921873	1.10959	0.850723
2018#	HPVw27c52c	MF588691	Gammapapillomavirus	Gammapapillomavirus 12	Gamma-HPV	Yes	No	7127	311	441	Group 1	Group 1	Group 1	Homo sapiens	human being	HPVmSK236,HPVEV07c367	6702	36.3839	1.45833	98	0.478401	0.397059	0.43773	0.20818	42.35	45.4575	1.04207	0.945087	1.09424	0.937153	1.1984	1.04768	0.444905	0.968232	1.11226	0.863478
2004	HPV48	U31789	Gammapapillomavirus	Gammapapillomavirus 2	Gamma-HPV	Yes	Yes	7100	312	473	Group 1	Group 1	Group 1	Homo sapiens	human being		6717	36.7335	1.93766	100	0.512609	0.43087	0.471739	0.28913	49.03	51.5215	1.08243	0.913613	1.13339	0.890703	1.14489	1.08056	0.445941	0.985169	1.10593	0.841714
2018#	HPVmSK109	MH777251	Gammapapillomavirus	Gammapapillomavirus 2	Gamma-HPV	Yes	No	7146	313	477	Group 1	Group 1	Group 1	Homo sapiens	human being		6744	36.3206	1.5544	106	0.512889	0.414222	0.463556	0.264	45.84	49.6967	1.10064	0.910506	1.12151	0.882347	1.15348	1.04256	0.480295	0.969331	1.17808	0.829756
2018#	HPVmSK040	MH972557	Gammapapillomavirus	Gammapapillomavirus 2	Gamma-HPV	Yes	No	7167	314	478	Group 1	Group 1	Group 1	Homo sapiens	human being	HPVmSK066	6750	36.8351	1.63137	92	0.474502	0.401166	0.437834	0.221952	43.68	46.526	1.08506	0.908109	1.09989	0.911021	1.21039	1.06719	0.405182	0.960182	1.1715	0.816061
2013	HPV131	GU117631	Gammapapillomavirus	Gammapapillomavirus 14	Gamma-HPV	Yes	Yes	7182	315	479	Group 1	Group 1	Group 1	Homo sapiens	human being		6765	36.7979	1.32685	90	0.480822	0.400457	0.440639	0.213699	42.56	45.9156	1.05556	0.91409	1.10173	0.935195	1.1892	1.10836	0.398015	0.971142	1.1056	0.850983
2018#	HPVKC5	JX444073	Gammapapillomavirus	Gammapapillomavirus 12	Gamma-HPV	Yes	No	7143	316	461	Group 1	Group 1	Group 1	Homo sapiens	human being	HPVmSK088	6735	36.9317	1.63313	103	0.495032	0.393406	0.444219	0.228997	44.03	47.0594	1.06401	0.907864	1.08969	0.938943	1.1965	1.06397	0.453348	0.948553	1.19719	0.852363
2018#	HPVmSK102	MH777244	Gammapapillomavirus	Gammapapillomavirus 12	Gamma-HPV	Yes	No	7126	317	462	Group 1	Group 1	Group 1	Homo sapiens	human being	HPVmSK235	6717	37.0453	1.51728	106	0.482091	0.406099	0.444095	0.238625	45.07	47.8191	1.09093	0.920597	1.06448	0.918018	1.19563	1.09923	0.464887	0.962616	1.11397	0.816016
2018#	HPVmSK039	MH777187	Gammapapillomavirus	Gammapapillomavirus 2	Gamma-HPV	Yes	No	7135	318	476	Group 1	Group 1	Group 1	Homo sapiens	human being		6747	37.0436	1.35934	88	0.468337	0.409567	0.438952	0.218223	43.33	46.2209	1.09648	0.888643	1.10922	0.904504	1.18908	1.11385	0.384186	0.933011	1.20495	0.831367
2017	HPV200	KP692114	Gammapapillomavirus	Gammapapillomavirus 2	Gamma-HPV	Yes	Yes	7137	319	474	Group 1	Group 1	Group 1	Homo sapiens	human being	SE370	6741	37.0321	1.47951	100	0.467705	0.407238	0.437471	0.226752	44.23	46.9071	1.08959	0.902235	1.1243	0.895293	1.1776	1.05511	0.434628	0.975835	1.16046	0.82056
2018#	HPVmSK116	MH777258	Gammapapillomavirus	Gammapapillomavirus 2	Gamma-HPV	Yes	No	7205	320	475	Group 1	Group 1	Group 1	Homo sapiens	human being		6732	37.2593	1.81175	102	0.488553	0.409341	0.448947	0.249084	46.52	48.5747	1.0824	0.896111	1.09384	0.924091	1.17622	1.10984	0.438427	0.950613	1.15624	0.842686
2004	HPV50	U31790	Gammapapillomavirus	Gammapapillomavirus 3	Gamma-HPV	Yes	Yes	7184	321	470	Group 1	Group 1	Group 1	Homo sapiens	human being		6741	36.7214	1.86019	95	0.475678	0.429841	0.45276	0.282507	47.86	51.0899	1.07596	0.916862	1.07222	0.93068	1.21484	1.08841	0.420478	0.939783	1.16849	0.834505
2015	HPV188	KR816175	Gammapapillomavirus	Gammapapillomavirus 3	Gamma-HPV	Yes	Yes	7185	322	471	Group 1	Group 1	Group 1	Homo sapiens	human being	HPVmSK178,HPVmSK021,FA27	6741	37.8606	1.43512	97	0.484004	0.392139	0.438071	0.253656	45.57	48.9505	1.07362	0.886711	1.07286	0.950784	1.22253	1.11472	0.402959	0.958402	1.14656	0.815834
2018#	HPVEV07c382	MF588723	Gammapapillomavirus	Gammapapillomavirus 3	Gamma-HPV	Yes	No	7159	323	468	Group 1	Group 1	Group 1	Homo sapiens	human being		6744	37.6516	1.81712	93	0.487191	0.400449	0.44382	0.22382	44.59	46.6785	1.04846	0.902109	1.08732	0.957789	1.17929	1.17045	0.392952	0.941167	1.1028	0.878607
2018#	HPVw23c77	MF588719	Gammapapillomavirus	Gammapapillomavirus 12	Gamma-HPV	Yes	No	7110	324	447	Group 1	Group 1	Group 1	Homo sapiens	human being	HPVmSK208	6690	36.777	1.50566	101	0.473708	0.398524	0.436116	0.223247	43.31	46.6023	1.06814	0.950176	1.09379	0.909193	1.19125	1.06471	0.449222	0.92453	1.16086	0.867253
2018#	HPVCG3	JF966379	Gammapapillomavirus	Gammapapillomavirus 12	Gamma-HPV	Yes	No	7095	325	446	Group 1	Group 1	Group 1	Homo sapiens	human being		6672	36.8909	1.52717	110	0.457389	0.382593	0.419991	0.213055	43.21	45.8392	1.07113	0.948937	1.07478	0.916109	1.2019	1.04342	0.487428	0.929675	1.17426	0.85293
2018#	HPVmSK041	MH777188	Gammapapillomavirus	Gammapapillomavirus 12	Gamma-HPV	Yes	No	6778	326	445	Group 1	Group 1	Group 1	Homo sapiens	human being		6357	36.8471	1.79872	104	0.502646	0.428131	0.465388	0.268078	46.97	49.993	1.07058	0.954524	1.08125	0.910046	1.18641	1.06061	0.484763	0.932952	1.14199	0.861152
2018#	HPVmSK072	MH777217	Gammapapillomavirus	Gammapapillomavirus 12	Gamma-HPV	Yes	No	7160	327	454	Group 1	Group 1	Group 1	Homo sapiens	human being		6501	37.0456	1.90434	114	0.478815	0.389522	0.434169	0.21959	44.78	46.3735	1.07755	0.987931	1.03923	0.90748	1.21814	1.05293	0.514738	0.935311	1.08817	0.83302
2013	HPV148	GU129016	Gammapapillomavirus	Gammapapillomavirus 12	Gamma-HPV	Yes	Yes	7164	328	455	Group 1	Group 1	Group 1	Homo sapiens	human being		6732	37.4222	1.77778	120	0.479358	0.405963	0.442661	0.230734	44.24	47.2116	1.06988	0.952734	1.04763	0.931277	1.21844	1.0473	0.511954	0.916041	1.18176	0.850889
2018#	HPVw23c101c	MF588711	Gammapapillomavirus	Gammapapillomavirus 9	Gamma-HPV	Yes	No	7301	329	398	Group 1	Group 1	Group 1	Homo sapiens	human being	HPVmSK007	6804	37.1006	1.45119	99	0.490258	0.393747	0.442003	0.222927	43.52	46.6023	1.09966	0.915838	1.10428	0.890135	1.21484	1.03726	0.426906	0.963577	1.18154	0.796515
2018#	HPVmSK210	MH777351	Gammapapillomavirus	Gammapapillomavirus 21	Gamma-HPV	Yes	No	6919	330	505	Group 1	Group 1	Group 1	Homo sapiens	human being		6465	37.4209	1.38032	103	0.462862	0.388587	0.425725	0.225543	43.58	46.831	1.07924	0.930068	1.05654	0.930551	1.22516	1.07509	0.459351	0.943242	1.15061	0.821539
2018#	HPVw11C39	MF588710	Gammapapillomavirus	Gammapapillomavirus 9	Gamma-HPV	Yes	No	7289	331	397	Group 1	Group 1	Group 1	Homo sapiens	human being	HPVmSK225	6795	38.0743	1.68795	115	0.495238	0.397279	0.446259	0.24263	45.7	48.122	1.07324	0.958693	1.06079	0.917108	1.21268	1.08946	0.471009	0.923832	1.11404	0.844907
2018#	HPVmSK120	MH777262	Gammapapillomavirus	Gammapapillomavirus 12	Gamma-HPV	Yes	No	7139	332	457	Group 1	Group 1	Group 1	Homo sapiens	human being		6729	37.0535	1.49385	115	0.478694	0.402085	0.44039	0.231188	43.97	47.2116	1.06159	0.974796	1.05232	0.924335	1.23279	1.01907	0.500314	0.93921	1.1355	0.838804
2018#	HPVw34c11a	MF588720	Gammapapillomavirus	Gammapapillomavirus 12	Gamma-HPV	Yes	No	7142	333	456	Group 1	Group 1	Group 1	Homo sapiens	human being	HPVmSK114	6729	37.3944	1.66	112	0.488029	0.39779	0.44291	0.229282	44.5	47.0594	1.0747	1.00536	1.00789	0.918376	1.28265	1.03873	0.478792	0.90786	1.11576	0.812293
2018#	HPVmSK245	MH777384	Gammapapillomavirus	Gammapapillomavirus 12	Gamma-HPV	Yes	No	7110	334	444	Group 1	Group 1	Group 1	Homo sapiens	human being		6720	37.103	1.49099	112	0.468679	0.398262	0.433471	0.216735	42.85	46.1445	1.08419	0.970476	1.04679	0.908669	1.20578	1.08886	0.486412	0.918327	1.10746	0.845378
2017	HPV157	KT698166	Gammapapillomavirus	Gammapapillomavirus 12	Gamma-HPV	Yes	Yes	7154	335	453	Group 1	Group 1	Group 1	Homo sapiens	human being	GC08	6744	37.5333	1.92251	130	0.485806	0.403388	0.444597	0.230769	44.53	47.2116	1.08315	0.981452	1.02687	0.913753	1.22366	1.03717	0.551577	0.943607	1.09891	0.817969
2018#	HPVmSK138	MH777280	Gammapapillomavirus	Gammapapillomavirus 12	Gamma-HPV	Yes	No	7239	336	451	Group 1	Group 1	Group 1	Homo sapiens	human being		6726	37.2924	1.801	137	0.486992	0.398448	0.44272	0.228206	44.37	46.9833	1.07168	0.921948	1.02974	0.957052	1.1908	1.04488	0.589696	0.946043	1.188	0.846855
2018#	HPVw18c25	MF588714	Gammapapillomavirus	Gammapapillomavirus 11	Gamma-HPV	Yes	No	7268	337	386	Group 1	Group 1	Group 1	Homo sapiens	human being		6786	37.8013	1.77837	121	0.476385	0.395095	0.43574	0.256585	46.7	49.1751	1.06905	0.938896	1.07642	0.924321	1.19144	1.06146	0.503035	0.923894	1.17652	0.86331
2004	HPV60	U31792	Gammapapillomavirus	Gammapapillomavirus 4	Gamma-HPV	Yes	Yes	7313	338	307	Group 1	Group 1	Group 1	Homo sapiens	human being		6849	37.1341	2.74929	120	0.560333	0.44614	0.503236	0.413315	53.35	58.7086	1.07078	0.908252	1.07169	0.94318	1.14405	1.12787	0.510708	0.985603	1.05972	0.85448
2018#	HPVmSK123	MH777265	Gammapapillomavirus	Gammapapillomavirus 3	Gamma-HPV	Yes	No	6883	339	469	Group 1	Group 1	Group 1	Homo sapiens	human being		6453	37.8458	1.75979	103	0.478714	0.398551	0.438632	0.206975	43.63	45.3812	1.05527	0.926317	1.08136	0.940748	1.18516	1.11777	0.447183	0.943398	1.10276	0.867026
2018#	HPVmSK206	MH777347	Gammapapillomavirus	Gammapapillomavirus 12	Gamma-HPV	Yes	No	7175	340	448	Group 1	Group 1	Group 1	Homo sapiens	human being		6765	37.8004	1.77097	136	0.507678	0.411819	0.459749	0.269428	46.79	50.0668	1.06623	0.955607	1.08979	0.907732	1.16755	1.01527	0.566849	0.955607	1.14203	0.860359
2018#	HPVmSK100	MH777243	Gammapapillomavirus	Gammapapillomavirus 9	Gamma-HPV	Yes	No	7218	341	410	Group 1	Group 1	Group 1	Homo sapiens	human being		6777	37.1744	1.51515	105	0.465138	0.400459	0.432798	0.211927	42.8	45.7629	1.04324	0.951496	1.10651	0.92354	1.20607	1.02447	0.451347	0.990564	1.08323	0.841348
2018#	HPV216	MF509821	Gammapapillomavirus	Gammapapillomavirus 9	Gamma-HPV	Yes	Yes	7233	342	407	Group 1	Group 1	Group 1	Homo sapiens	human being	HPVmSK099	6792	37.4596	2.22717	102	0.505292	0.420156	0.462724	0.260469	48.33	49.3991	1.04145	0.947722	1.07684	0.94751	1.21098	1.09251	0.431406	0.959004	1.07429	0.860001
2018#	HPVmSK087	MH777230	Gammapapillomavirus	Gammapapillomavirus 9	Gamma-HPV	Yes	No	7233	343	414	Group 1	Group 1	Group 1	Homo sapiens	human being		6945	37.3259	1.6059	106	0.477364	0.402958	0.440161	0.25818	46.39	49.2499	1.05663	0.941739	1.06207	0.942192	1.21923	1.09061	0.442017	0.976118	1.05917	0.827898
2018#	HPVmSK155	MH777297	Gammapapillomavirus	Gammapapillomavirus 9	Gamma-HPV	Yes	No	7225	344	413	Group 1	Group 1	Group 1	Homo sapiens	human being		6798	37.8668	1.88208	104	0.47949	0.404284	0.441887	0.234731	45.3	47.5157	1.04205	0.945339	1.06881	0.950707	1.21846	1.10299	0.430319	0.972776	1.0427	0.842534
2013	HPV129	GU233853	Gammapapillomavirus	Gammapapillomavirus 9	Gamma-HPV	Yes	Yes	7219	345	408	Group 1	Group 1	Group 1	Homo sapiens	human being		6741	37.3724	1.55348	105	0.478719	0.397712	0.438215	0.236156	44.25	47.5916	1.05469	1.00255	1.06576	0.906643	1.22	1.07624	0.448956	0.934276	1.03901	0.855181
2018#	HPVmSK076	MH777220	Gammapapillomavirus	Gammapapillomavirus 9	Gamma-HPV	Yes	No	7217	346	411	Group 1	Group 1	Group 1	Homo sapiens	human being		6786	37.4486	1.46199	110	0.459667	0.384407	0.422037	0.200541	41.62	44.9233	1.03975	0.970002	1.09172	0.925443	1.20591	1.04172	0.466128	0.938631	1.12295	0.875704
2018#	HPVmSK064	MH777209	Gammapapillomavirus	Gammapapillomavirus 9	Gamma-HPV	Yes	No	7229	347	412	Group 1	Group 1	Group 1	Homo sapiens	human being		6801	38.1434	1.60625	103	0.49635	0.411953	0.454151	0.217609	43.7	46.2209	1.0241	0.944751	1.10262	0.948178	1.2145	1.07045	0.420688	0.974585	1.07418	0.860583
2018#	HPVmSK086	MH777229	Gammapapillomavirus	Gammapapillomavirus 9	Gamma-HPV	Yes	No	7306	348	406	Group 1	Group 1	Group 1	Homo sapiens	human being		6786	38.2275	1.52233	98	0.482159	0.395629	0.438894	0.23372	44.05	47.4397	1.04996	0.942303	1.06554	0.948248	1.21242	1.1566	0.399672	0.974667	0.991023	0.836872
2018#	HPVmSK118	MH777260	Gammapapillomavirus	Gammapapillomavirus 14	Gamma-HPV	Yes	No	7106	349	480	Group 1	Group 1	Group 1	Homo sapiens	human being		6870	37.3403	2.03484	101	0.520127	0.398915	0.459521	0.277702	49.11	50.727	1.08268	0.954327	1.0747	0.899542	1.19012	1.13495	0.426385	0.918338	1.0934	0.852198
2018#	HPVmSK103	MH777245	Gammapapillomavirus	Gammapapillomavirus 14	Gamma-HPV	Yes	No	6597	350	481	Group 1	Group 1	Group 1	Homo sapiens	human being		6375	37.8383	1.53982	97	0.471971	0.394665	0.433318	0.227396	43.7	46.9071	1.07193	0.944342	1.09464	0.903845	1.17444	1.13405	0.429616	0.957643	1.04082	0.847152
2018#	HPVw11c13	MF588718	Gammapapillomavirus	Gammapapillomavirus 12	Gamma-HPV	Yes	No	7142	351	437	Group 1	Group 1	Group 1	Homo sapiens	human being		6750	37.8842	1.47754	100	0.490859	0.397623	0.444241	0.240402	44.91	47.8949	1.06841	0.941826	1.08498	0.916225	1.20805	1.10774	0.419708	0.9142	1.15	0.857906
2013	HPV132	GU117632	Gammapapillomavirus	Gammapapillomavirus 12	Gamma-HPV	Yes	Yes	7125	352	439	Group 1	Group 1	Group 1	Homo sapiens	human being	FA78	6723	37.9024	1.64664	111	0.483678	0.405977	0.444828	0.23954	44.63	47.8949	1.05486	0.908865	1.05635	0.968542	1.17989	1.15447	0.464595	0.935337	1.11335	0.876006
2018#	HPVmSK202	MH777343	Gammapapillomavirus	Gammapapillomavirus 12	Gamma-HPV	Yes	No	7271	353	460	Group 1	Group 1	Group 1	Homo sapiens	human being		6750	37.3227	1.61031	103	0.480578	0.401536	0.441057	0.229901	43.86	47.1355	1.03958	0.939852	1.06618	0.959508	1.19503	1.12434	0.440663	0.943641	1.07813	0.879549
2013	HPV153	JN171845	Gammapapillomavirus	Gammapapillomavirus 13	Gamma-HPV	Yes	Yes	7240	354	432	Group 1	Group 1	Group 1	Homo sapiens	human being		6798	37.3973	1.73122	118	0.480778	0.401176	0.440977	0.233379	45.19	47.3637	1.04745	0.940001	1.06408	0.950893	1.17437	1.10568	0.498496	0.957548	1.07303	0.874401
2018#	HPVw23c08c	MF588690	Gammapapillomavirus	Gammapapillomavirus 29	Gamma-HPV	Yes	No	7251	355	415	Group 1	Group 1	Group 1	Homo sapiens	human being		6774	37.7797	1.72261	117	0.491564	0.400365	0.445964	0.236206	45.58	47.5916	1.04966	0.901932	1.06102	0.973268	1.18629	1.10993	0.48614	0.98461	1.08447	0.84685
2018#	HPVLCOSOc196	MF588688	Gammapapillomavirus	Gammapapillomavirus 28	Gamma-HPV	Yes	No	7257	356	486	Group 1	Group 1	Group 1	Homo sapiens	human being	HPVmSK228	6813	37.2127	1.95658	116	0.510619	0.414159	0.462389	0.274779	47.89	50.5078	1.07392	0.936059	1.08643	0.915146	1.15786	1.09731	0.493949	0.952349	1.09861	0.86298
2018#	HPVmSK093	MH777236	Gammapapillomavirus	Gammapapillomavirus 28	Gamma-HPV	Yes	No	7363	357	489	Group 1	Group 1	Group 1	Homo sapiens	human being		6882	37.4348	1.93426	123	0.503145	0.396226	0.449686	0.25876	47.66	49.3245	1.05519	0.915808	1.08288	0.946341	1.146	1.10865	0.512574	0.981399	1.07099	0.86921
2018#	HPVKN2	JF966372	Gammapapillomavirus	Gammapapillomavirus 28	Gamma-HPV	Yes	No	7299	358	488	Group 1	Group 1	Group 1	Homo sapiens	human being	HPVmSK224	6825	37.8197	1.88208	109	0.490428	0.401094	0.445761	0.257521	47.53	49.2499	1.05905	0.903539	1.08872	0.946095	1.15086	1.16064	0.449255	0.985566	1.0304	0.858297
2018#	HPVmSK089	MH777232	Gammapapillomavirus	Gammapapillomavirus 28	Gamma-HPV	Yes	No	7386	359	487	Group 1	Group 1	Group 1	Homo sapiens	human being		6894	38.1655	1.72542	111	0.485504	0.401289	0.443396	0.227335	45.11	46.9071	1.0504	0.926928	1.07774	0.947194	1.17705	1.1462	0.443811	0.969842	1.02756	0.859294
2017	HPV201	KP692115	Gammapapillomavirus	Gammapapillomavirus 27	Gamma-HPV	Yes	Yes	7291	360	268	Group 1	Group 1	Group 1	Homo sapiens	human being	SE371,SE107,KC92	6867	37.618	1.5541	107	0.478417	0.407824	0.443121	0.234712	44.58	47.5157	1.05251	0.925918	1.08436	0.942861	1.18215	1.11874	0.443553	0.971719	1.06121	0.856058
2018#	HPVmSK079	MH777223	Gammapapillomavirus	Gammapapillomavirus 27	Gamma-HPV	Yes	No	7282	361	267	Group 1	Group 1	Group 1	Homo sapiens	human being		6873	37.8755	1.6221	108	0.485766	0.392228	0.438997	0.220967	44.07	46.4498	1.04078	0.928798	1.07435	0.958461	1.19029	1.12893	0.441873	0.968269	1.0515	0.863519
2018#	HPVTG550	MF176072	Gammapapillomavirus	Gammapapillomavirus 19	Gamma-HPV	Yes	Yes	7216	362	500	Group 1	Group 1	Group 1	Homo sapiens	human being	SE9,SE71,SIBX58,HPVmSK159	6735	37.5389	1.46602	99	0.487794	0.401658	0.444726	0.228006	44.42	46.9833	1.08251	0.980176	1.07491	0.885902	1.22522	1.08448	0.421464	0.943545	1.05579	0.817405
2018#	HPVmSK180	MH777322	Gammapapillomavirus	Gammapapillomavirus 19	Gamma-HPV	Yes	No	7222	363	498	Group 1	Group 1	Group 1	Homo sapiens	human being		6750	37.5887	1.22257	101	0.463814	0.380974	0.422394	0.217569	43.77	46.2209	1.08108	0.937178	1.09589	0.900427	1.18785	1.1064	0.428684	0.96867	1.06534	0.825899
2018#	HPVZJ01	KX082661	Gammapapillomavirus	Gammapapillomavirus 19	Gamma-HPV	Yes	No	7358	364	491	Group 1	Group 1	Group 1	Homo sapiens	human being	KC90,HPVmSK133	6759	37.8338	1.51985	103	0.488095	0.40293	0.445513	0.235348	44.34	47.5157	1.07443	0.931026	1.10795	0.903528	1.19327	1.08035	0.428597	0.976197	1.0819	0.823895
2018#	HPVmSK017	MH777165	Gammapapillomavirus	Gammapapillomavirus 19	Gamma-HPV	Yes	No	7268	365	502	Group 1	Group 1	Group 1	Homo sapiens	human being		6768	37.6068	1.51449	116	0.495723	0.416479	0.456101	0.247186	46.46	48.424	1.06446	0.95461	1.07142	0.921769	1.18824	1.08573	0.489193	0.96089	1.06695	0.847359
2018#	HPVTVMBSGc2450	MF588732	Gammapapillomavirus	Gammapapillomavirus 19	Gamma-HPV	Yes	No	7289	366	490	Group 1	Group 1	Group 1	Homo sapiens	human being		6792	37.6946	1.73275	118	0.491564	0.405837	0.4487	0.224806	44.33	46.7548	1.05613	0.914104	1.07667	0.952701	1.17921	1.08927	0.492279	0.98163	1.09303	0.849378
2013	HPV162	JX413108	Gammapapillomavirus	Gammapapillomavirus 19	Gamma-HPV	Yes	Yes	7214	367	499	Group 1	Group 1	Group 1	Homo sapiens	human being	KC2	6741	37.7275	1.65705	112	0.496096	0.399173	0.447634	0.227836	44.04	46.9833	1.0637	0.943355	1.10457	0.909013	1.15873	1.09973	0.471521	0.974842	1.04829	0.856982
2013	HPV166	JX413104	Gammapapillomavirus	Gammapapillomavirus 19	Gamma-HPV	Yes	Yes	7212	368	501	Group 1	Group 1	Group 1	Homo sapiens	human being	HPVmSK004,KC9	6756	38.3673	1.72719	117	0.491969	0.405232	0.4486	0.245984	46.02	48.3486	1.0796	0.948912	1.04505	0.925652	1.20487	1.1292	0.476059	0.956404	1.03757	0.821243
2013	HPV161	JX413109	Gammapapillomavirus	Gammapapillomavirus 19	Gamma-HPV	Yes	Yes	7238	369	496	Group 1	Group 1	Group 1	Homo sapiens	human being	KC1	6759	37.7306	1.43131	97	0.486474	0.413113	0.449794	0.223292	43.04	46.6023	1.04804	0.93077	1.09155	0.939704	1.20209	1.11322	0.406018	0.965941	1.06737	0.851226
2018#	HPVmSK054	MH777199	Gammapapillomavirus	Gammapapillomavirus 19	Gamma-HPV	Yes	No	7224	370	503	Group 1	Group 1	Group 1	Homo sapiens	human being		6759	37.9519	1.38085	110	0.47571	0.399175	0.437443	0.226398	42.86	46.831	1.09155	0.938669	1.05773	0.913553	1.21313	1.10642	0.455636	0.949948	1.08524	0.810509
2018#	HPVmSK197	MH777339	Gammapapillomavirus	Gammapapillomavirus 19	Gamma-HPV	Yes	No	7324	371	497	Group 1	Group 1	Group 1	Homo sapiens	human being		6768	37.6805	1.54903	116	0.467538	0.403517	0.435528	0.231289	43.93	47.2116	1.08519	0.933788	1.03922	0.932879	1.21493	1.09809	0.486653	0.948849	1.10755	0.81722
2018#	HPV210	MH460956	Gammapapillomavirus	Gammapapillomavirus 12	Gamma-HPV	Yes	Yes	7134	372	438	Group 1	Group 1	Group 1	Homo sapiens	human being		6642	37.988	1.61643	96	0.491204	0.401443	0.446324	0.228236	44.6	46.9833	1.08313	0.93441	1.03894	0.934149	1.22633	1.16742	0.404938	0.935685	1.05874	0.818358
2013	HPV163	JX413107	Gammapapillomavirus	Gammapapillomavirus 20	Gamma-HPV	Yes	Yes	7233	373	277	Group 1	Group 1	Group 1	Homo sapiens	human being	KC3	6816	37.7085	1.6096	110	0.497508	0.407793	0.452651	0.21749	43.84	46.1445	1.04007	0.991745	1.08519	0.914524	1.19483	1.08464	0.457855	0.951876	1.01977	0.872199
2015	HPV183	KR816171	Gammapapillomavirus	Gammapapillomavirus 20	Gamma-HPV	Yes	Yes	7286	374	279	Group 1	Group 1	Group 1	Homo sapiens	human being	HPVmSK104,SE73	6828	38.1975	1.59217	109	0.492308	0.411312	0.45181	0.234842	44.58	47.5157	1.03638	0.998679	1.04818	0.937122	1.23999	1.09725	0.441522	0.934327	1.02077	0.857367
2015	HPV194	KR816181	Gammapapillomavirus	Gammapapillomavirus 20	Gamma-HPV	Yes	Yes	7260	375	278	Group 1	Group 1	Group 1	Homo sapiens	human being	FA121	6828	38.1245	1.53374	105	0.497063	0.41211	0.454587	0.227293	44.59	46.9071	1.03165	1.01675	1.07743	0.911801	1.22728	1.08336	0.425279	0.941205	0.992317	0.865905
2018#	HPVmSK139	MH777281	Gammapapillomavirus	Gammapapillomavirus 12	Gamma-HPV	Yes	No	7123	376	443	Group 1	Group 1	Group 1	Homo sapiens	human being		6756	37.3782	1.5852	122	0.473255	0.390299	0.431777	0.201269	42.66	44.9233	1.04652	0.996478	1.08351	0.906504	1.16929	1.06084	0.519995	0.953592	1.03147	0.880862
2013	HPV165	JX444072	Gammapapillomavirus	Gammapapillomavirus 12	Gamma-HPV	Yes	Yes	7129	377	442	Group 1	Group 1	Group 1	Homo sapiens	human being	KC7	6666	37.9414	1.91502	128	0.486836	0.402309	0.444573	0.241109	45.66	47.9706	1.0714	1.00266	1.03316	0.907984	1.20726	1.07463	0.536079	0.930228	1.04284	0.845687
2018#	HPVmSK038	MH777186	Gammapapillomavirus	Gammapapillomavirus 8	Gamma-HPV	Yes	No	7299	378	523	Group 1	Group 1	Group 1	Homo sapiens	human being		6741	37.0025	1.30081	119	0.474646	0.403837	0.439242	0.224303	43.08	46.6785	1.10646	0.939344	1.06501	0.892013	1.17545	1.07625	0.516713	0.930459	1.15066	0.832246
2010	HPV119	GQ845441	Gammapapillomavirus	Gammapapillomavirus 8	Gamma-HPV	Yes	Yes	7251	379	519	Group 1	Group 1	Group 1	Homo sapiens	human being	FA155	6837	37.593	1.82349	125	0.488068	0.403872	0.44597	0.226925	44.53	46.9071	1.10646	0.978717	1.08194	0.859112	1.17023	1.06527	0.51885	0.921511	1.10411	0.839587
2015	HPV168	KC862317	Gammapapillomavirus	Gammapapillomavirus 8	Gamma-HPV	Yes	Yes	7204	380	524	Group 1	Group 1	Group 1	Homo sapiens	human being	KC15,SE64	6813	36.9346	1.85917	127	0.475395	0.40316	0.439278	0.22167	43.69	46.526	1.0917	0.955289	1.03573	0.916581	1.18531	1.07742	0.549362	0.911296	1.15928	0.85449
2018#	HPVdo1c232	MF588704	Gammapapillomavirus	Gammapapillomavirus 8	Gamma-HPV	Yes	No	7227	381	525	Group 1	Group 1	Group 1	Homo sapiens	human being	HPVmSK232	6834	37.4927	1.9881	134	0.509865	0.406726	0.458296	0.25426	46.86	48.9505	1.09817	0.986417	1.05367	0.880886	1.19566	1.02784	0.560122	0.911688	1.1495	0.840368
2018#	HPVmSK147	MH777289	Gammapapillomavirus	Gammapapillomavirus 8	Gamma-HPV	Yes	No	7213	382	516	Group 1	Group 1	Group 1	Homo sapiens	human being		6816	37.2695	1.79788	123	0.48565	0.409865	0.447758	0.255605	46.52	49.1003	1.062	0.995153	1.04773	0.913264	1.19669	1.07031	0.522021	0.928809	1.06526	0.8641
2013	HPV147	HM999999	Gammapapillomavirus	Gammapapillomavirus 8	Gamma-HPV	Yes	Yes	7224	383	515	Group 1	Group 1	Group 1	Homo sapiens	human being	FA13,GH659	6813	37.6958	1.7567	120	0.490258	0.408246	0.449252	0.224739	44.32	46.7548	1.07253	0.946187	1.06711	0.919872	1.21172	1.04464	0.4968	0.958654	1.1178	0.824713
2010	HPV112	EU541442	Gammapapillomavirus	Gammapapillomavirus 8	Gamma-HPV	Yes	Yes	7227	384	520	Group 1	Group 1	Group 1	Homo sapiens	human being	FA164	6840	37.387	1.95392	134	0.475676	0.399099	0.437387	0.237838	44.63	47.7433	1.1002	0.943069	1.01034	0.929056	1.2159	1.06196	0.560966	0.926873	1.15961	0.81572
2018#	HPVmSK046	MH777192	Gammapapillomavirus	Gammapapillomavirus 22	Gamma-HPV	Yes	No	7309	385	368	Group 1	Group 1	Group 1	Homo sapiens	human being	HPVmSK212	6918	37.846	1.54457	113	0.468878	0.382553	0.425716	0.207633	42.59	45.4575	1.06439	0.986797	1.08977	0.891711	1.18538	1.09315	0.456825	0.942667	1.02685	0.860239
2018#	HPVmSK050	MH777195	Gammapapillomavirus	Gammapapillomavirus 8	Gamma-HPV	Yes	No	7286	386	521	Group 1	Group 1	Group 1	Homo sapiens	human being		6894	37.8038	1.35116	128	0.467228	0.408769	0.437998	0.23295	44.89	47.3637	1.09881	0.998039	1.05588	0.871188	1.19371	1.07105	0.522763	0.904512	1.09862	0.844151
2013	HPV164	JX413106	Gammapapillomavirus	Gammapapillomavirus 8	Gamma-HPV	Yes	Yes	7233	387	522	Group 1	Group 1	Group 1	Homo sapiens	human being	KC4	6840	37.8828	1.95392	134	0.491892	0.397748	0.44482	0.238739	46.11	47.8191	1.07929	0.96418	1.06952	0.903196	1.1761	1.05264	0.547725	0.907172	1.16494	0.872837
2018#	HPVSE379	KP692117	Gammapapillomavirus	Gammapapillomavirus 8	Gamma-HPV	Yes	No	7320	388	517	Group 1	Group 1	Group 1	Homo sapiens	human being	HPVmSK031	6918	37.3702	1.70127	118	0.492857	0.398661	0.445759	0.221429	44.71	46.4498	1.08725	0.912919	1.06322	0.928261	1.19628	1.0778	0.490441	0.972056	1.1222	0.813333
2018#	HPVmSK030	MH777178	Gammapapillomavirus	Gammapapillomavirus 22	Gamma-HPV	Yes	No	7303	389	359	Group 1	Group 1	Group 1	Homo sapiens	human being		6627	37.5019	1.75747	116	0.475351	0.415649	0.4455	0.228856	45.18	47.0594	1.0649	0.932291	1.08382	0.926268	1.20196	1.02724	0.500542	0.957974	1.16505	0.839816
2018#	HPVw20c04	MF588695	Gammapapillomavirus	Gammapapillomavirus 1	Gamma-HPV	Yes	No	7204	390	271	Group 1	Group 1	Group 1	Homo sapiens	human being	HPVmSK234	6783	37.5827	1.79385	122	0.492707	0.402917	0.447812	0.223792	44.02	46.6785	1.05298	0.937704	1.08187	0.937447	1.17464	1.06598	0.514633	0.992863	1.06301	0.848094
2013	HPV137	HM999989	Gammapapillomavirus	Gammapapillomavirus 16	Gamma-HPV	Yes	Yes	7236	391	373	Group 1	Group 1	Group 1	Homo sapiens	human being	NJ2801H	6837	37.4909	1.72137	118	0.482852	0.390343	0.436597	0.245036	45.97	48.2731	1.07821	0.939941	1.0968	0.900795	1.16154	1.07938	0.49304	0.939941	1.12814	0.86189
2018#	HPVmSK065	MH777210	Gammapapillomavirus	Gammapapillomavirus 1	Gamma-HPV	Yes	No	7186	392	270	Group 1	Group 1	Group 1	Homo sapiens	human being		6768	37.7837	1.6221	109	0.488246	0.406872	0.447559	0.258137	46.78	49.2499	1.06899	0.947828	1.09953	0.904264	1.19607	1.0632	0.454443	0.984186	1.05898	0.823308
2017	HPV158	KT698168	Gammapapillomavirus	Gammapapillomavirus 1	Gamma-HPV	Yes	Yes	7192	393	269	Group 1	Group 1	Group 1	Homo sapiens	human being	GC23,HPVmSK106	6774	38.1478	1.92874	131	0.494991	0.403461	0.449226	0.238616	45.14	47.8191	1.08066	0.967184	1.06702	0.899829	1.17685	1.07445	0.536637	0.952209	1.06918	0.841178
2018#	HPVCG2	JF966378	Gammapapillomavirus	Gammapapillomavirus 12	Gamma-HPV	Yes	No	7152	394	452	Group 1	Group 1	Group 1	Homo sapiens	human being		6732	37.763	1.64425	118	0.478482	0.399815	0.439149	0.220268	44.12	46.3735	1.08086	0.914006	1.03125	0.953357	1.22792	1.08251	0.494064	0.93922	1.16817	0.818477
2018#	HPVmSK057	MH777202	Gammapapillomavirus	Gammapapillomavirus 8	Gamma-HPV	Yes	No	7269	395	514	Group 1	Group 1	Group 1	Homo sapiens	human being		6849	37.9205	1.36865	123	0.466758	0.382514	0.424636	0.209016	42.35	45.5338	1.06256	0.934088	1.06028	0.943294	1.19761	1.07955	0.500488	0.910581	1.18001	0.873533
2018#	HPVmSK244	MH777383	Gammapapillomavirus	Gammapapillomavirus	Gamma-HPV	Yes	No	7269	396	509	Group 1	Group 1	Group 1	Homo sapiens	human being		6843	37.1812	1.66221	116	0.471802	0.397524	0.434663	0.235672	44.73	47.5916	1.07701	0.972226	1.09578	0.885472	1.15694	1.08383	0.493677	0.980962	1.00438	0.843942
2018#	HPVw18c39	MF588741	Gammapapillomavirus	Gammapapillomavirus 22	Gamma-HPV	Yes	No	7201	397	360	Group 1	Group 1	Group 1	Homo sapiens	human being	HPVmSK143	6810	36.7018	2.09432	143	0.468056	0.410059	0.439058	0.214318	43.75	45.9156	1.07905	1.00741	1.01623	0.909963	1.15492	1.08291	0.625817	0.946886	1.00218	0.864465
2018#	HPVw21c693	MF588743	Gammapapillomavirus	Gammapapillomavirus 22	Gamma-HPV	Yes	No	7217	398	362	Group 1	Group 1	Group 1	Homo sapiens	human being	HPVmSK016	6813	36.4807	1.99092	136	0.466455	0.398005	0.43223	0.220762	45.05	46.4498	1.07108	0.948891	1.05124	0.932017	1.15105	1.04939	0.601192	0.953945	1.12281	0.870854
2018#	HPV223	MG063749	Gammapapillomavirus	Gammapapillomavirus 22	Gamma-HPV	Yes	Yes	7223	399	358	Group 1	Group 1	Group 1	Homo sapiens	human being	HPVMTS3,HPVmSK077	6813	36.9238	2.01352	125	0.492747	0.401632	0.447189	0.237987	45.95	47.7433	1.10131	0.929991	1.05189	0.910648	1.17506	1.07558	0.540147	0.958896	1.11918	0.822093
2018#	HPVL55	KF482069	Gammapapillomavirus	Gammapapillomavirus 22	Gamma-HPV	Yes	No	7177	400	361	Group 1	Group 1	Group 1	Homo sapiens	human being	HPVmSK200	6789	37.388	1.69814	139	0.475261	0.400363	0.437812	0.233772	44.37	47.4397	1.083	0.962675	0.985268	0.950717	1.19111	1.12031	0.589265	0.917491	1.0895	0.854442
2018#	HPVw20c08a	MF588742	Gammapapillomavirus	Gammapapillomavirus 22	Gamma-HPV	Yes	No	7214	401	363	Group 1	Group 1	Group 1	Homo sapiens	human being	HPVmSK135	6810	37.4194	1.93322	132	0.467815	0.403898	0.435857	0.242974	46.56	48.122	1.06953	0.945631	1.00817	0.961991	1.1983	1.10243	0.554689	0.940627	1.09257	0.850761
2018#	HPVm090c145	MF588737	Gammapapillomavirus	Gammapapillomavirus 22	Gamma-HPV	Yes	No	7285	402	352	Group 1	Group 1	Group 1	Homo sapiens	human being	HPVmSK182	6822	37.5877	1.84459	131	0.511011	0.402247	0.456629	0.252135	46.91	48.8004	1.07943	0.973439	1.07814	0.892358	1.1604	1.06169	0.545977	0.951004	1.07112	0.856181
2018#	HPVmSK098	MH777241	Gammapapillomavirus	Gammapapillomavirus 22	Gamma-HPV	Yes	No	7253	403	349	Group 1	Group 1	Group 1	Homo sapiens	human being		6813	38.0618	1.54525	139	0.479708	0.398541	0.439124	0.22891	44.48	47.0594	1.03945	0.98361	1.06185	0.935746	1.155	1.08528	0.566349	0.953804	1.02269	0.895927
2018#	HPVmSK034	MH777182	Gammapapillomavirus	Gammapapillomavirus 22	Gamma-HPV	Yes	No	7235	404	357	Group 1	Group 1	Group 1	Homo sapiens	human being		6810	37.6098	1.56135	120	0.48	0.400909	0.440455	0.211818	43.2	45.7629	1.06403	0.972426	1.0985	0.895024	1.14719	1.09544	0.498875	0.933728	1.06427	0.888987
2018#	HPVTVMBSWc141	MF588739	Gammapapillomavirus	Gammapapillomavirus 22	Gamma-HPV	Yes	No	7260	405	350	Group 1	Group 1	Group 1	Homo sapiens	human being	HPVmSK194	6819	37.8382	1.85754	127	0.478064	0.409317	0.443691	0.240163	46.15	47.8949	1.07121	0.972561	1.05962	0.912349	1.15911	1.1217	0.522178	0.910377	1.07725	0.889541
2018#	HPVmSK249	MH777388	Gammapapillomavirus	Gammapapillomavirus	Gamma-HPV	Yes	No	7291	406	311	Group 1	Group 1	Group 1	Homo sapiens	human being		6732	36.3407	1.76746	111	0.484957	0.401886	0.443422	0.217782	43.8	46.2209	1.06893	0.945208	1.02462	0.94921	1.20136	1.10608	0.503953	0.988754	1.02153	0.823235
2018#	HPVEV03c45	MF588721	Gammapapillomavirus	Gammapapillomavirus 13	Gamma-HPV	Yes	No	7240	407	433	Group 1	Group 1	Group 1	Homo sapiens	human being	HPVHIVGc158,HPVmSK215	6750	36.643	1.59907	125	0.499775	0.393967	0.446871	0.249437	45.02	48.5747	1.05052	0.930468	1.0323	0.972886	1.18631	1.07181	0.553057	0.995384	1.06187	0.845923
2018#	HPVmSK075	MH777219	Gammapapillomavirus	Gammapapillomavirus 13	Gamma-HPV	Yes	No	7348	408	434	Group 1	Group 1	Group 1	Homo sapiens	human being		6756	36.5072	1.6167	129	0.474977	0.397634	0.436306	0.242948	44.07	48.122	1.05682	0.950212	1.01008	0.968118	1.18331	1.09213	0.575893	0.947664	1.09375	0.86969
2018#	HPVmSK126	MH777268	Gammapapillomavirus	Gammapapillomavirus 12	Gamma-HPV	Yes	No	7224	409	450	Group 1	Group 1	Group 1	Homo sapiens	human being		6801	36.4276	1.42878	120	0.481785	0.385246	0.433515	0.219035	43.3	46.2972	1.09149	0.952419	1.05374	0.906484	1.19686	1.0322	0.533144	0.930888	1.17736	0.836642
2018#	HPVmSK218	MH777357	Gammapapillomavirus	Gammapapillomavirus 12	Gamma-HPV	Yes	No	7229	410	449	Group 1	Group 1	Group 1	Homo sapiens	human being		6813	36.7443	2.36908	117	0.526767	0.435118	0.480942	0.345182	52.35	55.2599	1.05587	0.930895	1.0556	0.952661	1.20802	1.03873	0.509776	0.944751	1.18076	0.855929
2015	HPV171	KF006398	Gammapapillomavirus	Gammapapillomavirus 11	Gamma-HPV	Yes	Yes	7261	411	387	Group 1	Group 1	Group 1	Homo sapiens	human being		6765	36.9049	1.68018	114	0.474886	0.400913	0.4379	0.224201	43.95	46.6785	1.03958	0.931704	1.11653	0.934288	1.13931	1.06698	0.495376	0.981075	1.08635	0.891213
2013	HPV169	JX413105	Gammapapillomavirus	Gammapapillomavirus 11	Gamma-HPV	Yes	Yes	7252	412	388	Group 1	Group 1	Group 1	Homo sapiens	human being	KC6,vs202-8	6768	37.6805	1.62098	110	0.478539	0.39863	0.438584	0.247032	46.14	48.424	1.04117	0.912452	1.1208	0.940396	1.15594	1.08564	0.459344	0.975206	1.1066	0.881051
2018#	HPVmSK115	MH777257	Gammapapillomavirus	Gammapapillomavirus 26	Gamma-HPV	Yes	No	7367	413	528	Group 1	Group 1	Group 1	Homo sapiens	human being		6861	37.3165	1.51111	128	0.472744	0.402199	0.437471	0.233623	45.09	47.4397	1.09363	0.935935	1.0565	0.911753	1.18825	1.05437	0.539328	0.938421	1.16714	0.831697
2018#	HPVEV07c390	MF588705	Gammapapillomavirus	Gammapapillomavirus 26	Gamma-HPV	Yes	No	7298	414	529	Group 1	Group 1	Group 1	Homo sapiens	human being	HPVmSK092,HPVCGG5287s1382c000001	6861	37.331	1.85185	125	0.507509	0.419611	0.46356	0.247792	45.25	48.4994	1.0897	0.942001	1.06379	0.907745	1.16818	1.08902	0.526963	0.949458	1.10451	0.840999
2018#	HPVTVMBSGc529	MF588706	Gammapapillomavirus	Gammapapillomavirus 26	Gamma-HPV	Yes	No	7262	415	530	Group 1	Group 1	Group 1	Homo sapiens	human being	HPVmSK084	6855	36.9126	1.64411	113	0.480379	0.40009	0.440235	0.217411	43.01	46.1445	1.04114	0.929693	1.09839	0.943118	1.16337	1.06997	0.485187	0.957184	1.12924	0.888933
2018#	HPV211	MF509816	Gammapapillomavirus	Gammapapillomavirus 26	Gamma-HPV	Yes	Yes	7253	416	531	Group 1	Group 1	Group 1	Homo sapiens	human being		6849	37.6729	1.649	111	0.49658	0.398085	0.447332	0.239398	44.53	47.8191	1.07063	0.924088	1.07169	0.933172	1.19077	1.1102	0.458983	0.914164	1.16606	0.867053
2018#	HPVmSK062	MH777207	Gammapapillomavirus	Gammapapillomavirus 15	Gamma-HPV	Yes	No	7316	417	422	Group 1	Group 1	Group 1	Homo sapiens	human being		6801	35.4891	1.59351	90	0.468497	0.40459	0.436544	0.234473	44.16	47.4397	1.08111	0.882674	1.07228	0.947174	1.18629	1.11081	0.420789	0.973632	1.15483	0.83391
2018#	AmPV4	MF327538	Lambdapapillomavirus	Lambdapapillomavirus 7	NPA-PV	Yes	No	7996	418	558	Group 1	Group 1	Group 1	Ailuropoda melanoleuca	Giant panda		6660	38.4996	1.5274	102	0.491196	0.405931	0.448563	0.250232	46.45	48.65	1.12043	0.853795	1.17128	0.866373	1.14345	1.08504	0.418972	0.990402	1.18298	0.798017
2013	CcrPV1	HQ585856	Lambdapapillomavirus	Lambdapapillomavirus 5	NPA-PV	Yes	No	8344	419	563	Group 1	Group 1	Group 1	Crocuta crocuta	spotted hyena		6711	38.2969	1.50097	101	0.478621	0.401379	0.44	0.26023	46.57	49.3991	1.10933	0.864103	1.13075	0.894378	1.16597	1.11256	0.413666	0.982335	1.1468	0.798999
2015	TePV1	KC460986	Dyophipapillomavirus	Dyophipapillomavirus 1	NPA-PV	Yes	No	7533	420	556	Group 1	Group 1	Group 1	Talpa europaea	European mole	Bruges/2009/05	6519	39.5441	1.77451	116	0.498573	0.411037	0.454805	0.270219	47.84	50.1406	1.07734	0.8792	1.15563	0.901489	1.14283	1.08979	0.460846	0.986701	1.13225	0.839375
2010	CPV6	FJ492744	Lambdapapillomavirus	Lambdapapillomavirus 3	NPA-PV	Yes	No	8242	421	562	Group 1	Group 2	Group 2	Canis familiaris	Domestic dog		6714	41.1765	1.72311	116	0.508249	0.411091	0.45967	0.309349	49.42	52.9232	1.1651	0.829149	1.17013	0.837885	1.18608	1.08462	0.409584	0.970202	1.2111	0.727546
2018#	TtPV8	MG744508	Dyopipapillomavirus	Dyopipapillomavirus 2	NPA-PV	Yes	No	7299	422	94	Group 1	Group 1	Group 1	Tursiops truncatus	Bottlenosed dolphin		6495	36.8049	0.983103	64	0.464627	0.422084	0.443356	0.207457	42.09	45.3812	1.07314	1.00386	1.13066	0.852584	1.22841	1.09316	0.292337	0.869132	1.13281	0.874246
2018#	BcPV1	MH605022	Dyomupapillomavirus	Dyomupapillomavirus 2	NPA-PV	Yes	No	7126	423	570	Group 1	Group 1	Group 1	Boa constrictor	red-tailed boa		6540	39.7072	2.91247	191	0.506132	0.416038	0.461085	0.265566	47.92	49.845	1.02014	0.984698	0.975781	1.00941	1.11718	1.11995	0.753293	0.886611	1.09642	0.98076
2013	MsPV1	HQ262535	Dyomupapillomavirus	Dyomupapillomavirus 1	NPA-PV	Yes	No	7048	424	569	Group 1	Group 1	Group 2	Morelia spilota	Snake python		6384	40.7373	2.85848	183	0.514037	0.409003	0.46152	0.294288	50.81	51.8775	1.13324	0.927812	0.982161	0.931956	1.15427	1.11255	0.691591	0.91746	1.11486	0.819478
2013	BpPV1	GU220391	Dyolambdapapillomavirus	Dyolambdapapillomavirus 1	NPA-PV	Yes	No	7737	425	181	Group 2	Group 1	Group 2	Bettongia penicillata	Brush-tailed Bettong		6939	44.6744	1.72488	120	0.525612	0.433853	0.479733	0.378174	51.47	57.1189	1.08101	0.939798	1.08868	0.899881	1.15963	1.3468	0.349221	0.970039	0.771196	0.816873
2018#	TtPV9	MG905161	Omikronpapillomavirus	Omikronpapillomavirus 1	NPA-PV	Yes	No	7772	426	105	Group 2	Group 2	Group 2	Tursiops truncatus	Bottlenosed dolphin		7017	41.1974	1.08077	76	0.499337	0.434821	0.467079	0.296067	47.93	52.0189	1.0948	0.94628	1.07895	0.889722	1.3255	1.168	0.255851	0.915755	1.0335	0.737859
2013	TtPV5	JN709470	Omikronpapillomavirus	Omikronpapillomavirus 1	NPA-PV	Yes	No	7853	427	108	Group 2	Group 2	Group 2	Tursiops truncatus	Bottlenosed dolphin		7017	42.3066	1.29408	91	0.525132	0.433422	0.479277	0.306437	49.38	52.7169	1.11167	0.963657	1.07202	0.863873	1.34819	1.13775	0.290532	0.897238	1.05677	0.70961
2013	TtPV6	JN709471	Omikronpapillomavirus	Omikronpapillomavirus 1	NPA-PV	Yes	No	7895	428	107	Group 2	Group 2	Group 2	Tursiops truncatus	Bottlenosed dolphin		7005	43.0484	1.50997	106	0.523683	0.439132	0.481408	0.323595	50.7	53.9298	1.10412	0.944758	1.0935	0.869266	1.31429	1.13458	0.327922	0.914544	1.05801	0.724682
2010	TtPV1	EU240894	Upsilonpapillomavirus	Upsilonpapillomavirus 1	NPA-PV	Yes	No	8089	429	99	Group 2	Group 2	Group 2	Tursiops truncatus	Bottlenosed dolphin		6948	42.8407	1.55106	108	0.515681	0.448925	0.482303	0.315412	49.61	53.3309	1.07256	0.993513	1.06506	0.885567	1.3325	1.13151	0.341203	0.880907	1.04572	0.769138
2013	DdPV1	GU117620	Upsilonpapillomavirus	Upsilonpapillomavirus 1	NPA-PV	Yes	No	7852	430	101	Group 2	Group 2	Group 2	Delphinus delphis	Cetacean (Dolphine)		6900	42.7332	1.44613	100	0.524752	0.455896	0.490324	0.29658	49.23	52.0894	1.0539	0.971497	1.08377	0.90641	1.33551	1.12135	0.318816	0.874583	1.09035	0.789796
2010	TtPV3	EU240895	Upsilonpapillomavirus	Upsilonpapillomavirus 1	NPA-PV	Yes	No	7915	431	100	Group 2	Group 2	Group 2	Tursiops truncatus	Bottlenosed dolphin		6948	44.9663	1.7234	120	0.537327	0.462673	0.5	0.34734	51.2	55.3811	1.04036	0.968019	1.08409	0.916932	1.35685	1.1194	0.343432	0.876324	1.07895	0.768856
2013	TtPV7	JN709472	Upsilonpapillomavirus	Upsilonpapillomavirus 1	NPA-PV	Yes	No	7783	432	102	Group 2	Group 2	Group 2	Tursiops truncatus	Bottlenosed dolphin		6876	44.5364	1.68336	116	0.539193	0.454463	0.496828	0.340281	51.53	54.9525	1.06707	0.98697	1.06569	0.893136	1.33946	1.15597	0.340879	0.895323	0.993249	0.745542
2013	TtPV4	JN709469	Upsilonpapillomavirus	Upsilonpapillomavirus 1	NPA-PV	Yes	No	7792	433	103	Group 2	Group 2	Group 2	Tursiops truncatus	Bottlenosed dolphin		6900	45.3507	1.80766	125	0.549347	0.452005	0.500676	0.358269	52.63	56.0291	1.05656	0.989612	1.05847	0.904429	1.36772	1.13486	0.353745	0.906756	0.996147	0.716168
2013	PphPV4	GU117623	Dyopipapillomavirus	Dyopipapillomavirus 1	NPA-PV	Yes	No	7348	434	95	Group 2	Group 2	Group 2	Phocoena phocoena	Harbor porpoise (Cetacean, Dolphine)		6501	44.4905	1.88766	123	0.522695	0.446727	0.484711	0.36216	51.85	56.2565	1.04394	0.99427	1.01291	0.954976	1.30125	1.22657	0.383898	0.799145	1.03621	0.878898
2013	PphPV2	GU117622	Upsilonpapillomavirus	Upsilonpapillomavirus 3	NPA-PV	Yes	No	7635	435	97	Group 2	Group 2	Group 2	Phocoena phocoena	Harbor porpoise (Cetacean, Dolphine)		7011	44.5488	1.9072	134	0.515528	0.450311	0.482919	0.367791	52.47	56.589	1.04611	0.927621	1.01635	1.00346	1.32978	1.18476	0.386909	0.846959	1.10298	0.815425
2018#	BPVujs21015	MH512005	Dyoxipapillomavirus	Dyoxipapillomavirus 1	NPA-PV	Yes	No	7389	436	214	Group 2	Group 1	Group 2	Bos taurus	Domestic cow		6855	40.5354	1.51317	104	0.494107	0.419764	0.456936	0.295558	48.87	52.0189	1.16281	0.899388	1.06961	0.863163	1.22896	1.19364	0.370981	0.91146	1.09154	0.745534
2017	MpPV1	KF006988	Taupapillomavirus	Taupapillomavirus 4	NPA-PV	Yes	No	7985	437	204	Group 2	Group 2	Group 2	Mustela putorius furo	Ferret	MpPV1	7314	41.9667	1.55483	114	0.505499	0.447124	0.476311	0.301607	48.36	52.4396	1.15336	0.894895	1.11666	0.842333	1.18162	1.2344	0.358452	0.946416	0.999893	0.757611
2015	RtPV2	KC810012	Xipapillomavirus	Xipapillomavirus 3	NPA-PV	Yes	No	7267	438	188	Group 2	Group 2	Group 2	Rangifer tarandus	Reindeer		6828	42.492	1.47531	101	0.519239	0.434586	0.476913	0.315527	49.21	53.3982	1.10243	0.847625	1.18237	0.878035	1.20628	1.14716	0.329448	1.015	1.04706	0.736131
2010	EePV1	FJ379293	Dyoetapapillomavirus	Dyoetapapillomavirus 1	NPA-PV	Yes	No	8256	439	182	Group 2	Group 2	Group 2	Erinaceus europaeus	European hedgehog	EhPV,HhPV1	6684	43.211	1.90988	128	0.525974	0.424861	0.475417	0.343228	50.62	55.1377	1.03822	0.859778	1.2088	0.911777	1.14434	1.12675	0.414795	0.992333	1.08236	0.859781
2017	BPV18	KU519393	Dyokappapapillomavirus	Dyokappapapillomavirus 4	NPA-PV	Yes	No	7282	440	533	Group 2	Group 1	Group 2	Bos taurus	Domestic cow		6843	41.2039	1.50124	103	0.497503	0.417612	0.457558	0.315479	49.35	53.3309	1.08608	0.909657	1.14429	0.87957	1.21408	1.13493	0.357382	0.967413	1.05133	0.789749
2017	BPV21	KU519396	Dyoxipapillomavirus	Dyoxipapillomavirus 2	NPA-PV	Yes	No	7149	441	215	Group 2	Group 2	Group 2	Bos taurus	Domestic cow		6717	42.0341	1.78174	120	0.513116	0.411413	0.462264	0.33364	50.69	54.5757	1.09325	0.832413	1.1566	0.916438	1.18829	1.12102	0.407152	0.993289	1.12985	0.776402
2017	BPV19	KU519394	Dyoxipapillomavirus	Dyoxipapillomavirus 2	NPA-PV	Yes	No	7253	442	216	Group 2	Group 2	Group 2	Bos taurus	Domestic cow		6819	42.8989	1.74053	119	0.513845	0.419882	0.466863	0.349523	51.24	55.561	1.12236	0.866982	1.17508	0.847405	1.17628	1.15401	0.383935	0.956547	1.09696	0.779037
2017	BPV17	KU519392	Xipapillomavirus	Xipapillomavirus 4	NPA-PV	Yes	No	7402	443	185	Group 2	Group 2	Group 2	Bos taurus	Domestic cow		6984	42.7021	1.75664	123	0.495776	0.425522	0.460649	0.354824	50.88	55.8556	1.12668	0.85337	1.17791	0.850931	1.19775	1.1106	0.389583	0.966608	1.14341	0.75154
2017	VvPV1	KF857586	Treisetapapillomavirus	Treisetapapillomavirus 1	NPA-PV	Yes	No	7519	444	226	Group 2	Group 2	Group 2	Vulpes vulpes	Red Fox	VvulPV1,ILAT 93957	6909	43.3232	1.80453	125	0.507149	0.421358	0.464254	0.36908	51.21	56.6434	1.08668	0.868967	1.22643	0.842293	1.15705	1.11373	0.387115	0.961861	1.11489	0.824256
2017	CePV3	KT932712	Xipapillomavirus	Xipapillomavirus 5	NPA-PV	Yes	No	7409	445	186	Group 2	Group 2	Group 2	Cervus elaphus	Red deer	CelaPV2	6891	43.219	1.51976	105	0.51167	0.440305	0.475987	0.340215	49.82	54.9525	1.11065	0.842239	1.17135	0.881378	1.21264	1.17007	0.328636	0.999127	1.04851	0.729976
2018#	RtiPV2	KT852571	pending	pending	NPA-PV	Yes	No	7342	446	608	Group 2	Group 2	Group 2	Rusa timorensis	Deer		6549	42.7026	1.43205	94	0.517764	0.437707	0.477736	0.321649	49.89	53.7981	1.05803	0.926499	1.16933	0.874765	1.27145	1.09444	0.317894	0.892876	1.15998	0.82254
2018#	EhPVKSA416	KX434763	Dyoupsilonpapillomavirus	Dyoupsilonpapillomavirus 1	NPA-PV	Yes	No	6985	447	547	Group 2	Group 1	Group 2	Talpa europaea	Straw-coloured fruit bat		6960	41.8075	2.40619	168	0.521008	0.426802	0.473905	0.302079	50.87	52.4396	1.10135	0.863044	1.10324	0.926187	1.16211	1.08001	0.555233	0.972543	1.15674	0.805306
2015	EhPV1	JX123128	Dyoupsilonpapillomavirus	Dyoupsilonpapillomavirus 1	NPA-PV	Yes	No	7891	448	546	Group 2	Group 1	Group 2	Talpa europaea	Straw-coloured fruit bat		6933	42.5694	2.20112	153	0.531431	0.426661	0.479046	0.31654	50.35	53.4654	1.0573	0.923871	1.09923	0.935053	1.22163	1.08127	0.489102	0.96624	1.07411	0.811555
2004	CPV1	D55633	Lambdapapillomavirus	Lambdapapillomavirus 2	NPA-PV	Yes	No	8607	449	561	Group 2	Group 2	Group 2	Canis familiaris	Domestic dog	CoPV	6693	43.153	1.92222	129	0.524182	0.42515	0.474666	0.342239	50.34	55.0762	1.10388	0.866191	1.16626	0.873993	1.21971	1.07865	0.416355	0.939082	1.18774	0.777706
2015	ElPV1	KJ410351	Lambdapapillomavirus	Lambdapapillomavirus 4	NPA-PV	Yes	No	8194	450	559	Group 2	Group 2	Group 2	Enhydra lutris nereis	Southern sea otter		6675	43.5828	1.98715	133	0.529792	0.423095	0.476443	0.352887	51.98	55.7386	1.13974	0.915119	1.11078	0.842069	1.22259	1.14999	0.422055	0.868937	1.13923	0.791206
2013	BPV12	JF834523	Xipapillomavirus	Xipapillomavirus 2	NPA-PV	Yes	No	7197	451	187	Group 2	Group 2	Group 2	Bos taurus	Domestic cow		6402	42.029	2.04145	131	0.525858	0.424843	0.47535	0.305945	49.5	52.7169	1.11661	0.889043	1.1129	0.88467	1.18838	1.12217	0.464414	0.954283	1.099	0.782234
2017	BPV15	KM983393	Xipapillomavirus	Xipapillomavirus 1	NPA-PV	Yes	No	7189	452	194	Group 2	Group 2	Group 2	Bos taurus	Domestic cow	Aks-02	6414	43.1327	1.91321	123	0.51859	0.419121	0.468856	0.352487	51.57	55.6796	1.12262	0.870045	1.12497	0.887298	1.23531	1.11365	0.415373	0.98419	1.0874	0.714876
2018#	BPV24	MG602223	Xipapillomavirus	Xipapillomavirus 1	NPA-PV	Yes	No	7256	453	197	Group 2	Group 2	Group 2	Bos taurus	Domestic cow		6333	42.155	1.85885	118	0.509804	0.42451	0.467157	0.32598	50.6	54.0607	1.15627	0.905725	1.07627	0.865069	1.25329	1.12936	0.41963	0.905725	1.13087	0.733883
2017	BPV04AC14	KX098515	Xipapillomavirus	Xipapillomavirus 1	NPA-PV	Yes	No	7282	454	193	Group 2	Group 2	Group 2	Bos taurus	Domestic cow	AC14	6477	42.9606	1.92545	125	0.51505	0.431916	0.473483	0.338748	51.07	54.8903	1.13722	0.876272	1.06988	0.910971	1.26098	1.14341	0.420185	0.91776	1.13618	0.73336
2004	BPV4	X05817	Xipapillomavirus	Xipapillomavirus 1	NPA-PV	Yes	No	7265	455	196	Group 2	Group 2	Group 2	Bos taurus	Domestic cow		6435	42.5271	1.9845	128	0.515414	0.424855	0.470135	0.331888	51.91	54.4483	1.11804	0.896935	1.09231	0.897882	1.25723	1.08871	0.44133	0.913427	1.17228	0.761495
2013	BPV11	AB543507	Xipapillomavirus	Xipapillomavirus 1	NPA-PV	Yes	No	7251	456	198	Group 2	Group 2	Group 2	Bos taurus	Domestic cow		6849	42.8426	2.09699	144	0.506588	0.427533	0.46706	0.347115	51.87	55.3811	1.11615	0.892023	1.08827	0.902374	1.23932	1.10597	0.460258	0.908674	1.16663	0.775254
2004	BPV3	AF486184	Xipapillomavirus	Xipapillomavirus 1	NPA-PV	Yes	No	7276	457	192	Group 2	Group 2	Group 2	Bos taurus	Domestic cow		6459	43.6979	2.08526	135	0.520843	0.434116	0.47748	0.352659	51.9	55.7386	1.0993	0.886496	1.12382	0.899585	1.22678	1.11146	0.439079	0.930444	1.1286	0.7837
2018#	BPV26	MG281846	Xipapillomavirus	Xipapillomavirus 1	NPA-PV	Yes	No	7261	458	199	Group 2	Group 2	Group 2	Bos taurus	Domestic cow		6414	43.5682	2.33318	150	0.525933	0.425594	0.475763	0.352399	52.68	55.6796	1.11168	0.86926	1.09701	0.920316	1.2286	1.08658	0.494633	0.923668	1.18712	0.774796
2010	BPV10	AB331651	Xipapillomavirus	Xipapillomavirus 1	NPA-PV	Yes	No	7399	459	190	Group 2	Group 2	Group 2	Bos taurus	Domestic cow	AA5	6609	44.0217	1.93237	128	0.522107	0.442145	0.482126	0.355127	52.18	55.8556	1.11578	0.860122	1.17011	0.865296	1.2375	1.08283	0.401485	0.966719	1.14486	0.727547
2004	BPV6	AJ620208	Xipapillomavirus	Xipapillomavirus 1	NPA-PV	Yes	No	7296	460	191	Group 2	Group 2	Group 2	Bos taurus	Domestic cow		6513	43.9951	2.31311	151	0.529272	0.432651	0.480961	0.356497	52.95	55.9137	1.15749	0.910187	1.0967	0.840779	1.24342	1.089	0.479866	0.910187	1.14405	0.724878
2017	PpuPV1	KT932713	Dyokappapapillomavirus	Dyokappapapillomavirus 5	NPA-PV	Yes	No	7138	461	532	Group 2	Group 2	Group 2	Pudu puda	Southern Pudu		6744	43.5985	1.5819	107	0.518859	0.428243	0.473551	0.356026	50.75	55.9137	1.12747	0.799624	1.09903	0.952853	1.20845	1.26622	0.337453	0.921071	1.11013	0.773843
2018#	AmPV1	MF327535	Omegapapillomavirus	Omegapapillomavirus 3	NPA-PV	Yes	No	7676	462	90	Group 2	Group 2	Group 2	Ailuropoda melanoleuca	Giant panda		6627	44.0229	1.56579	104	0.525082	0.428504	0.476793	0.363338	50.47	56.3127	1.1128	0.86634	1.19504	0.843167	1.26346	1.09382	0.325996	0.846789	1.28204	0.80449
2004	OcPV1	AF227240	Kappapapillomavirus	Kappapapillomavirus 1	NPA-PV	Yes	No	7565	463	549	Group 2	Group 2	Group 2	Oryctolagus cuniculus	New Zealand white rabbit	ROPV	7023	44.6243	2.58486	182	0.527545	0.429264	0.478405	0.381225	53.49	57.2718	1.13473	0.90005	1.05293	0.905864	1.21846	1.144	0.52202	0.902349	1.10714	0.770078
2010	ChPV1	DQ091200	Phipapillomavirus	Phipapillomavirus 1	NPA-PV	Yes	No	7542	464	183	Group 2	Group 2	Group 2	Capra hircus	Domestic goat		7068	44.9478	2.80835	199	0.521834	0.442795	0.482314	0.381659	54.6	57.3221	1.10915	0.899959	1.12352	0.874185	1.12466	1.13999	0.55771	0.911365	1.093	0.862978
2018#	BPVNY8385	KY705374	Dyokappapapillomavirus	Dyokappapapillomavirus 6	NPA-PV	Yes	No	7480	465	535	Group 2	Group 1	Group 2	Bos taurus	Domestic cow		6993	44.0736	1.92555	135	0.532387	0.41748	0.474933	0.368678	52.65	56.6434	1.06436	0.896925	1.10177	0.945157	1.24528	1.1631	0.400491	0.945533	1.04721	0.792237
2017	BPV16	KU519391	Dyokappapapillomavirus	Dyokappapapillomavirus 3	NPA-PV	Yes	No	7527	466	534	Group 2	Group 2	Group 2	Bos taurus	Domestic cow		7065	44.3597	2.10363	149	0.537815	0.427245	0.48253	0.362229	52.21	56.2565	1.04342	0.935811	1.07767	0.951795	1.28474	1.11782	0.431339	0.909498	1.08558	0.806637
2013	BPV7	DQ217793	Dyoxipapillomavirus	Dyoxipapillomavirus 1	NPA-PV	Yes	No	7412	467	213	Group 2	Group 2	Group 2	Bos taurus	Domestic cow	SIBX2,RTRX10	6783	45.2581	1.94089	132	0.529601	0.429096	0.479348	0.399725	53.15	58.1692	1.12755	0.870052	1.18223	0.832657	1.26769	1.07678	0.382564	0.957888	1.1419	0.68862
2017	BPV20	KU519395	Xipapillomavirus	Xipapillomavirus 3	NPA-PV	Yes	No	7277	468	189	Group 2	Group 2	Group 2	Bos taurus	Domestic cow		6837	44.7848	2.05689	141	0.53125	0.427536	0.479393	0.383152	53.71	57.372	1.09575	0.901419	1.15745	0.859325	1.24358	1.09536	0.412529	0.926196	1.12348	0.768971
2004	BPV5	AF457465	Epsilonpapillomavirus	Epsilonpapillomavirus 1	NPA-PV	Yes	No	7841	469	610	Group 2	Group 2	Group 2	Bos taurus	Domestic cow		6867	44.0087	1.87364	129	0.529067	0.440739	0.484903	0.348355	50.46	55.4413	1.08596	0.851146	1.17652	0.895802	1.22485	1.10239	0.389572	0.911269	1.20797	0.810132
2018#	BPV25	MG252779	Epsilonpapillomavirus	Epsilonpapillomavirus 1	NPA-PV	Yes	No	7770	470	612	Group 2	Group 2	Group 2	Bos taurus	Domestic cow		6843	44.5125	2.02594	139	0.526625	0.451264	0.488944	0.357401	51.91	55.9715	1.12478	0.88281	1.1283	0.86845	1.2652	1.10048	0.410624	0.871007	1.21119	0.767732
2010	BPV8	DQ098913	Epsilonpapillomavirus	Epsilonpapillomavirus 1	NPA-PV	Yes	No	7791	471	611	Group 2	Group 2	Group 2	Bos taurus	Domestic cow		6825	46.1493	2.16279	148	0.539367	0.453394	0.49638	0.39276	53.01	57.8531	1.09656	0.905561	1.16664	0.844666	1.26543	1.08961	0.407384	0.896152	1.14508	0.767694
2018#	LwPV2	MG571089	Treisetapapillomavirus	Treisetapapillomavirus 2	NPA-PV	Yes	No	7456	472	227	Group 2	Group 2	Group 2	Leptonychotes weddellii	Weddell seal		6954	45.5536	2.3953	167	0.52559	0.437472	0.481531	0.403649	53.71	58.3419	1.12542	0.879011	1.09876	0.898043	1.23755	1.13631	0.465025	0.918335	1.11383	0.748045
2010	BPV9	AB331650	Xipapillomavirus	Xipapillomavirus 1	NPA-PV	Yes	No	7303	473	195	Group 2	Group 2	Group 2	Bos taurus	Domestic cow		6405	45.1558	2.50779	161	0.537046	0.42954	0.483293	0.386925	54.36	57.5685	1.10198	0.913245	1.09061	0.898382	1.24408	1.10155	0.492992	0.939661	1.07784	0.748652
2017	BPV14	KP276343	Deltapapillomavirus	Deltapapillomavirus 4	NPA-PV	Yes	No	7966	474	628	Group 2	Group 2	Group 2	Bos taurus	Domestic cow	CGKnose1	6738	43.7685	1.8206	123	0.53315	0.439872	0.486511	0.336534	51.41	54.7651	1.07666	0.908126	1.1968	0.849093	1.24131	1.057	0.381948	0.904517	1.18932	0.816945
2013	BgPV1	JX174437	Deltapapillomavirus	Deltapapillomavirus 4	NPA-PV	Yes	No	7946	475	627	Group 2	Group 2	Group 2	Bos grunniens	Yak		6735	45.1059	2.17681	147	0.535469	0.446682	0.491076	0.367963	53	56.589	1.09881	0.879147	1.19731	0.841679	1.20449	1.08303	0.430215	0.917423	1.17065	0.804139
2013	BPV13	JQ798171	Deltapapillomavirus	Deltapapillomavirus 4	NPA-PV	Yes	No	7961	476	626	Group 2	Group 2	Group 2	Bos taurus	Domestic cow		6747	45.5876	1.95122	132	0.545704	0.455667	0.500686	0.364717	52.9	56.4241	1.11937	0.858124	1.2121	0.826035	1.24309	1.08114	0.377141	0.872426	1.24571	0.787848
2004	BPV2	M20219	Deltapapillomavirus	Deltapapillomavirus 4	NPA-PV	Yes	No	7937	477	625	Group 2	Group 2	Group 2	Bos taurus	Domestic cow		6729	46.391	2.075	140	0.546746	0.45417	0.500458	0.390467	53.58	57.7124	1.09951	0.868911	1.20265	0.843606	1.26701	1.0716	0.387214	0.885598	1.21696	0.772959
2004	BPV1	X02346	Deltapapillomavirus	Deltapapillomavirus 4	NPA-PV	Yes	No	7945	478	624	Group 2	Group 2	Group 2	Bos taurus	Domestic cow		6414	45.6947	2.1604	139	0.537759	0.458874	0.498316	0.371332	54.08	56.8047	1.10255	0.895668	1.18629	0.831496	1.24517	1.07189	0.41539	0.908194	1.16548	0.772104
2004	OaPV1	U83594	Deltapapillomavirus	Deltapapillomavirus 3	NPA-PV	Yes	No	7761	479	618	Group 2	Group 2	Group 2	Ovis aries	Domestic sheep	OvPV1	6735	46.2609	2.42855	164	0.536305	0.463695	0.5	0.388787	54.49	57.6648	1.00093	0.885151	1.24017	0.893483	1.208	1.02547	0.455113	0.9197	1.20438	0.891424
2004	OaPV2	U83595	Deltapapillomavirus	Deltapapillomavirus 3	NPA-PV	Yes	No	7758	480	617	Group 2	Group 2	Group 2	Ovis aries	Domestic sheep	OvPV2	6735	46.7644	2.45817	166	0.539238	0.464433	0.501836	0.400642	54.03	58.2129	1.03249	0.900558	1.23604	0.849863	1.22176	1.02924	0.450687	0.881524	1.22174	0.879241
2015	MscPV2	JQ692938	Dyotaupapillomavirus	Dyotaupapillomavirus 1	NPA-PV	Yes	No	7531	481	543	Group 2	Group 2	Group 2	Miniopterus schreibersii	Bent-wing bat	MscPV1,TT20F	6936	46.1749	1.91257	133	0.534314	0.445187	0.48975	0.408645	53.41	58.5494	0.995694	0.855163	1.23588	0.935419	1.23009	1.09802	0.361347	1.0299	1.04329	0.788883
2015	EsPV1	KC858263	Dyopsipapillomavirus	Dyopsipapillomavirus 1	NPA-PV	Yes	No	7668	482	541	Group 2	Group 2	Group 2	Eptesicus serotinus	Serotine bat	EserPV1	7062	45.8051	1.4548	103	0.52454	0.430324	0.477432	0.420245	51.53	58.9723	1.04643	0.803395	1.2472	0.911621	1.24492	1.14039	0.280134	1.06285	1.02807	0.693834
2017	EsPV3	KC858265	Dyopsipapillomavirus	Dyopsipapillomavirus 1	NPA-PV	Yes	No	7711	483	542	Group 2	Group 2	Group 2	Eptesicus serotinus	Serotine bat	EserPV3	7095	45.0162	1.51835	108	0.518551	0.431253	0.474902	0.401571	51.26	58.2563	1.0398	0.844039	1.20983	0.916924	1.26549	1.11973	0.303629	1.03829	1.0374	0.711921
2010	MmiPV1	DQ269468	Pipapillomavirus	Pipapillomavirus 2	NPA-PV	Yes	No	7393	484	223	Group 2	Group 2	Group 2	Micromys minutus	Old World harvest mouse	MmPV1	6831	43.5684	2.05869	141	0.523982	0.428054	0.476018	0.352941	52.49	55.7386	1.06736	0.927598	1.18058	0.851199	1.20552	1.06609	0.438552	1.00361	1.03262	0.772146
2013	AsPV1	HQ625440	Pipapillomavirus	Pipapillomavirus 2	NPA-PV	Yes	No	7589	485	220	Group 2	Group 2	Group 2	Apodemus sylvaticus	Long-tailed field mouse		6912	45.4834	1.97691	137	0.538082	0.439516	0.488799	0.387993	52.37	57.6168	1.03416	0.906677	1.18136	0.892576	1.21162	1.14673	0.38507	1.02772	0.938784	0.766176
2017	CePV2	KU350625	Epsilonpapillomavirus	Epsilonpapillomavirus 2	NPA-PV	Yes	No	8082	486	609	Group 2	Group 2	Group 2	Cervus elaphus	Red deer	BernieDPV	6765	45.0686	1.81336	123	0.536139	0.447392	0.491766	0.365965	53.06	56.4794	1.08856	0.882535	1.16004	0.878769	1.26127	1.12938	0.360061	1.00044	1.02164	0.698308
2018#	LwPV1	MG571090	Lambdapapillomavirus	Lambdapapillomavirus 6	NPA-PV	Yes	No	7502	487	557	Group 2	Group 1	Group 2	Leptonychotes weddellii	Weddell seal		6990	43.9783	2.0976	147	0.527594	0.420751	0.474172	0.368653	52.52	56.6434	1.09211	0.824748	1.14445	0.932448	1.17225	1.16275	0.436246	1.01935	1.04165	0.757614
2013	CcanPV1	KC020689	Dyosigmapapillomavirus	Dyosigmapapillomavirus 1	NPA-PV	Yes	No	7433	488	548	Group 2	Group 2	Group 2	Castor canadensis	North American beaver		6855	45.5987	2.86629	197	0.554905	0.434743	0.494824	0.378938	53.71	57.1702	0.967521	0.910298	1.13787	0.993345	1.2411	0.996457	0.553115	1.04403	1.06131	0.794282
2004	FcPV1	AY057109	Etapapillomavirus	Etapapillomavirus 1	NPA-PV	Yes	No	7729	489	640	Group 2	Group 2	Group 2	Fringilla coelebs	Chaffinch		6612	48.0761	3.34993	222	0.567948	0.447048	0.507498	0.427835	56.32	59.2497	0.99289	0.921237	1.15215	0.938463	1.14248	1.10204	0.584259	0.974432	1.01851	0.898147
2018#	PaPV2	MF168943	Treisepsilonpapillomavirus	Treisepsilonpapillomavirus 2	NPA-PV	Yes	No	7654	490	636	Group 2	Group 2	Group 2	Pygoscelis adeliae	Adélie penguin		7290	47.2906	3.11987	228	0.566285	0.467175	0.51673	0.384583	54.63	57.471	0.963374	0.948598	1.19563	0.906672	1.14512	1.06219	0.559433	1.01228	0.983915	0.894846
2018#	SsPV2	KY817993	pending	pending	NPA-PV	Yes	No	8218	491	599	Group 2	Group 2	Group 2	Sus scrofa	Domestic pig		7602	47.5459	2.86089	218	0.54819	0.469296	0.508743	0.411143	56.06	58.6298	1.03597	0.92822	1.0945	0.946096	1.17659	1.19471	0.506838	1.00189	0.883478	0.804373
2010	MfPV2	GU014531	Betapapillomavirus	Betapapillomavirus 6	NHP-PV	Yes	No	7632	492	180	Group 2	Group 2	Group 2	Macaca fascicularis	Cynomolgus macaque		7056	48.9822	3.40684	241	0.56343	0.442257	0.502843	0.464567	57.72	60.1822	1.02106	0.876812	1.0782	1.02555	1.18002	1.16307	0.57022	0.962796	1.00794	0.844444
2018#	HPV220	MH172377	Gammapapillomavirus	Gammapapillomavirus 17	Gamma-HPV	Yes	Yes	7381	493	303	Group 2	Group 1	Group 2	Homo sapiens	human being		6828	44.3178	1.4537	154	0.494817	0.403785	0.449301	0.253718	45.11	48.9505	1.05908	0.877236	1.02995	1.01421	1.25725	1.18102	0.464235	0.898546	1.11537	0.81627
2017	RtiPV1	KP757765	Treisthetapapillomavirus	Treisthetapapillomavirus 1	NPA-PV	Yes	No	7773	494	184	Group 2	Group 2	Group 2	Rusa timorensis	Deer	RtimPV1,IZW 39/08	7251	45.9485	2.61384	190	0.53427	0.45381	0.49404	0.38825	53.66	57.6168	1.04912	0.840849	1.05688	1.04471	1.2009	1.20155	0.499805	0.970466	1.02855	0.809601
2018#	MmPV4	MG837559	Gammapapillomavirus	Gammapapillomavirus 30	NHP-PV	Yes	No	7424	495	257	Group 2	Group 1	Group 2	Macacca mulatta	Rhesus macaque		6858	46.0878	2.53054	174	0.541854	0.425293	0.483573	0.415842	54.91	58.8239	1.05978	0.855733	1.06996	1.00454	1.20926	1.19683	0.479222	0.913094	1.07963	0.836116
2010	EdPV1	AY684126	Sigmapapillomavirus	Sigmapapillomavirus 1	NPA-PV	Yes	No	7428	496	545	Group 2	Group 1	Group 2	Erethizon dorsatum	North American porcupine		6837	45.2079	2.72794	187	0.547673	0.441482	0.494577	0.36873	54.43	56.6434	0.961131	0.971727	1.09893	0.982325	1.22379	1.07495	0.535859	0.94817	1.02587	0.898516
2004	HPV41	X56147	Nupapillomavirus	Nupapillomavirus 1	Mu/Nu-HPV	Yes	No	7614	497	544	Group 2	Group 2	Group 2	Homo sapiens	human being		7005	47.1736	1.95387	230	0.493358	0.438388	0.465873	0.278974	46.51	50.7998	1.00109	0.937068	1.04449	1.01774	1.23762	1.09543	0.592008	0.910785	1.08106	0.868257
2010	TtPV2	AY956402	Upsilonpapillomavirus	Upsilonpapillomavirus 2	NPA-PV	Yes	No	7866	498	98	Group 2	Group 2	Group 2	Tursiops truncatus	Bottlenosed dolphin		6756	46.2413	2.2301	151	0.536934	0.451985	0.49446	0.397045	53.23	58.0359	1.00367	0.957709	1.06346	0.980812	1.32012	1.13688	0.419835	0.812745	1.13717	0.884372
2004	PsPV1	AJ238373	Omikronpapillomavirus	Omikronpapillomavirus 1	NPA-PV	Yes	No	7879	499	106	Group 2	Group 2	Group 2	Phocoena spinipinnis	Burmeister's porpoise	PsPV	7035	47.4043	2.12766	150	0.556833	0.467492	0.512163	0.398496	53.14	58.0807	1.03269	0.895463	1.07069	1.00019	1.29825	1.21193	0.380117	0.895463	1.02378	0.794389
2013	PphPV1	GU117621	Omikronpapillomavirus	Omikronpapillomavirus 1	NPA-PV	Yes	No	7596	500	104	Group 2	Group 2	Group 2	Phocoena phocoena	Harbor porpoise (Cetacean, Dolphine)		6948	48.3269	2.0968	146	0.560287	0.46078	0.510533	0.429852	53.62	59.3151	1.06067	0.913273	1.11686	0.91157	1.3331	1.15976	0.360028	0.892569	1.05049	0.728394
2018#	LwPV6	MG571091	Omegapapillomavirus	Omegapapillomavirus 2	NPA-PV	Yes	No	7658	501	92	Group 2	Group 2	Group 2	Leptonychotes weddellii	Weddell seal		6663	48.7871	2.36598	158	0.573633	0.45395	0.513791	0.438055	53.29	59.5597	1.01628	0.895406	1.13874	0.953313	1.27778	1.16516	0.400363	0.871432	1.08706	0.843315
2018#	LwPV7	MG571092	Omegapapillomavirus	Omegapapillomavirus 2	NPA-PV	Yes	No	7674	502	91	Group 2	Group 2	Group 2	Leptonychotes weddellii	Weddell seal		6672	48.4223	2.3927	160	0.564689	0.453526	0.509108	0.435778	53.2	59.501	1.0096	0.902948	1.12569	0.96573	1.28496	1.1544	0.412575	0.880194	1.08817	0.837117
2018#	TpPVKSA433	KX434767	pending	pending	NPA-PV	Yes	No	7083	503	538	Group 2	Group 2	Group 2	Taphozous perforatus	Bat		6918	47.3033	2.47375	172	0.560479	0.417811	0.489145	0.439078	54.51	59.6167	1.08556	0.871224	1.22664	0.8222	1.16894	1.11068	0.446629	1.01316	1.02569	0.749347
2018#	TpPVKSA424	KX434764	pending	pending	NPA-PV	Yes	No	7180	504	539	Group 2	Group 2	Group 2	Taphozous perforatus	Bat		7026	46.7083	3.0647	216	0.551422	0.414442	0.482932	0.432823	55.07	59.4099	1.05614	0.888072	1.20614	0.865128	1.09327	1.09519	0.564025	1.06249	0.960931	0.808925
2015	EsPV2	KC858264	Dyoomegapapillomavirus	Dyoomegapapillomavirus 1	NPA-PV	Yes	No	7574	505	575	Group 2	Group 2	Group 2	Eptesicus serotinus	Serotine bat	EserPV2	6951	48.7588	2.05194	143	0.561668	0.44543	0.503549	0.459184	53.02	60.0716	1.02196	0.897095	1.23365	0.855701	1.25203	1.14436	0.348772	0.943041	1.03412	0.794266
2015	FcaPV4	KF147892	Taupapillomavirus	Taupapillomavirus 3	NPA-PV	Yes	No	7616	506	212	Group 2	Group 2	Group 2	Felis catus	Domestic cat		6918	49.4379	2.34938	163	0.560572	0.450603	0.505588	0.475637	54.49	60.3427	1.13321	0.868372	1.12323	0.873267	1.25585	1.2278	0.390238	0.927186	0.995944	0.685977
2018#	LwPV5	MG571094	Taupapillomavirus	Taupapillomavirus 5	NPA-PV	Yes	No	7682	507	209	Group 2	Group 2	Group 2	Leptonychotes weddellii	Weddell seal		7248	50.1239	3.09661	225	0.565087	0.452838	0.508963	0.492104	55.86	60.4772	1.11645	0.945781	1.10433	0.834051	1.23975	1.16461	0.497503	0.968902	0.928672	0.674339
2015	RrPV1	KC876045	Dyokappapapillomavirus	Dyokappapapillomavirus 2	NPA-PV	Yes	No	7256	508	536	Group 2	Group 2	Group 2	Rupicapra rupicapra	Chamois		6720	48.8572	2.83467	191	0.575856	0.432932	0.504394	0.456984	56.28	60.0312	1.04404	0.955085	1.20574	0.804063	1.23068	1.06816	0.479658	0.980031	1.00954	0.756229
2013	OaPV3	FJ796965	Dyokappapapillomavirus	Dyokappapapillomavirus 1	NPA-PV	Yes	No	7344	509	537	Group 2	Group 2	Group 2	Ovis aries	Sheep		6738	46.9805	2.75311	186	0.558891	0.432333	0.495612	0.415704	54.64	58.8239	1.09206	0.966224	1.20392	0.761465	1.25978	0.977762	0.501393	0.924627	1.15105	0.748739
2018#	FcaPV5	KY853656	Taupapillomavirus	Taupapillomavirus 3	NPA-PV	Yes	No	7600	510	211	Group 2	Group 2	Group 2	Felis catus	Domestic cat		6864	46.4545	2.25225	155	0.545824	0.443341	0.494582	0.404063	53.56	58.3419	1.10382	0.934662	1.10407	0.862865	1.25128	1.17294	0.428411	0.986068	0.942504	0.690292
2015	FcaPV3	JX972168	Taupapillomavirus	Taupapillomavirus 3	NPA-PV	Yes	No	7583	511	210	Group 2	Group 2	Group 2	Felis catus	Domestic cat		6858	47.3975	2.19541	151	0.546112	0.447559	0.496835	0.429928	54.34	59.3151	1.10448	0.847892	1.1278	0.917785	1.2351	1.20635	0.396574	0.985514	0.992748	0.694654
2017	CPV17	KT272399	Taupapillomavirus	Taupapillomavirus 1	NPA-PV	Yes	No	8007	512	208	Group 2	Group 2	Group 2	Canis familiaris	Labrador dog		7053	47.7585	2.34762	166	0.548839	0.451599	0.500219	0.432764	55.04	59.4099	1.13898	0.957943	1.11666	0.793847	1.29124	1.14211	0.414142	0.953408	0.960509	0.637987
2010	CPV2	AY722648	Taupapillomavirus	Taupapillomavirus 1	NPA-PV	Yes	No	8101	513	207	Group 2	Group 2	Group 2	Canis familiaris	Domestic dog	CfPV2	7146	47.627	2.77778	199	0.53763	0.461073	0.499351	0.429931	56.05	59.3151	1.144	0.918876	1.10131	0.838733	1.19644	1.18274	0.491881	0.967002	0.946685	0.708127
2017	CPV19	KX599536	Taupapillomavirus	Taupapillomavirus 1	NPA-PV	Yes	No	7941	514	205	Group 2	Group 2	Group 2	Canis familiaris	Domestic dog	tvmb1	7059	47.4071	2.23258	158	0.544098	0.451514	0.497806	0.428697	53.75	59.2826	1.11673	0.87844	1.15274	0.856621	1.22868	1.1795	0.400496	0.96345	1.00377	0.711118
2010	CPV7	FJ492742	Taupapillomavirus	Taupapillomavirus 1	NPA-PV	Yes	No	7955	515	206	Group 2	Group 2	Group 2	Canis familiaris	Domestic dog		7074	47.6452	2.19966	156	0.530621	0.46063	0.495626	0.439633	54.27	59.6167	1.11835	0.886343	1.14976	0.850308	1.27412	1.14663	0.39045	0.981308	1.00616	0.650114
2013	CPV13	JX141478	Taupapillomavirus	Taupapillomavirus 2	NPA-PV	Yes	No	8228	516	203	Group 2	Group 2	Group 2	Canis familiaris	Domestic dog		7119	48.4938	2.29788	164	0.558555	0.456247	0.507401	0.442316	53.79	59.6719	1.15244	0.958134	1.12867	0.765762	1.30369	1.14993	0.394204	0.958134	0.947052	0.600763
2018#	CPV23	MH285954	Taupapillomavirus	Taupapillomavirus 2	NPA-PV	Yes	No	8140	517	202	Group 2	Group 2	Group 2	Canis familiaris	Domestic dog		7071	49.4146	2.48272	176	0.5576	0.462111	0.509855	0.467367	55.03	60.2154	1.07828	0.961621	1.11625	0.847621	1.32844	1.13808	0.408605	0.954849	0.951864	0.646228
2018#	CPV22	MH285953	Taupapillomavirus	Taupapillomavirus 2	NPA-PV	Yes	No	8300	518	201	Group 2	Group 2	Group 2	Canis familiaris	Domestic dog		7077	48.5271	2.32558	165	0.561626	0.457605	0.509615	0.437937	54.51	59.5597	1.10757	0.934426	1.12402	0.839711	1.31813	1.13599	0.396904	0.956997	0.98384	0.634591
2018#	CPV21	MH285952	Taupapillomavirus	Taupapillomavirus 2	NPA-PV	Yes	No	8225	519	200	Group 2	Group 2	Group 2	Canis familiaris	Domestic dog		7047	48.3227	2.56192	181	0.550309	0.45278	0.501545	0.450132	53.7	59.8757	1.10031	0.906895	1.12455	0.873622	1.29006	1.11775	0.442997	0.981713	1.01082	0.647759
2010	PlpPV1	AY904724	Lambdapapillomavirus	Lambdapapillomavirus 1	NPA-PV	Yes	No	8103	520	565	Group 2	Group 2	Group 2	Panthera leo persica	Asiatic lion		6696	45.6956	2.17456	146	0.541052	0.428506	0.484779	0.400369	53.41	58.1692	1.19297	0.897927	1.14282	0.773267	1.28207	1.07851	0.419441	0.950746	1.10893	0.611326
2010	UuPV1	DQ180494	Lambdapapillomavirus	Lambdapapillomavirus 1	NPA-PV	Yes	No	8078	521	564	Group 2	Group 2	Group 2	Uncia uncia	Snow leopard		6690	47.5104	2.66846	179	0.54797	0.436347	0.492159	0.441421	53.96	59.6445	1.18496	0.894286	1.18242	0.745001	1.24817	1.05141	0.475869	0.983954	1.08998	0.604231
2010	PcPV1	AY904723	Lambdapapillomavirus	Lambdapapillomavirus 1	NPA-PV	Yes	No	8321	522	567	Group 2	Group 2	Group 2	Puma concolor	Puma		6690	48.5987	2.68336	180	0.556273	0.444188	0.500231	0.45941	55.19	60.0716	1.14765	0.897545	1.15535	0.802572	1.28903	1.07554	0.457364	0.961996	1.07989	0.614929
2004	FcaPV1	AF480454	Lambdapapillomavirus	Lambdapapillomavirus 1	NPA-PV	Yes	No	8300	523	568	Group 2	Group 2	Group 2	Felis catus	Domestic cat	FdPV1	6690	47.4061	2.60883	175	0.549283	0.447015	0.498149	0.427117	54.67	59.2165	1.14685	0.868168	1.15875	0.829822	1.20778	1.12901	0.467563	0.955464	1.07406	0.706645
2010	LrPV1	AY904722	Lambdapapillomavirus	Lambdapapillomavirus 1	NPA-PV	Yes	No	8233	524	566	Group 2	Group 2	Group 2	Lynx rufus	Bobcat		6684	49.0301	2.96926	199	0.560185	0.439352	0.499769	0.474537	55.98	60.3304	1.11077	0.919475	1.11292	0.858943	1.28368	1.09364	0.496495	0.954104	1.04289	0.660902
2010	PlPV1	AY763115	Lambdapapillomavirus	Lambdapapillomavirus 4	NPA-PV	Yes	No	8170	525	560	Group 2	Group 2	Group 2	Procyon lotor	Raccoon		6651	46.9486	2.60909	174	0.54912	0.434198	0.491659	0.426321	53.7	59.1828	1.04105	0.874151	1.18239	0.910646	1.22213	1.06942	0.480299	1.02225	1.06273	0.743908
2015	RfPV1	KC858266	Treisdeltapapillomavirus	Treisdeltapapillomavirus 1	NPA-PV	Yes	No	8249	526	540	Group 2	Group 2	Group 2	Rhinolophus ferrumequinum	Greater horseshoe bat	RferPV1	6846	46.824	2.57867	177	0.55455	0.430059	0.492304	0.423268	54.25	59.0793	1.04589	0.911604	1.1082	0.936862	1.28373	1.08444	0.476433	0.963093	1.0713	0.736696
2010	McPV2	DQ664501	Pipapillomavirus	Pipapillomavirus 2	NPA-PV	Yes	No	7522	527	222	Group 2	Group 2	Group 2	Mastomys coucha	Multimammate Mouse		6840	47.3462	2.62467	180	0.55379	0.44394	0.498865	0.427599	54.79	59.2497	0.976159	0.95574	1.15578	0.924406	1.1897	1.14744	0.473506	0.967438	0.947012	0.882292
2010	RnPV1	GQ180114	Pipapillomavirus	Pipapillomavirus 2	NPA-PV	Yes	No	7378	528	224	Group 2	Group 2	Group 2	Rattus norvegicus	Norweyian rat		6861	46.8382	2.64573	182	0.553908	0.446092	0.5	0.406559	54.41	58.4675	0.985532	0.976138	1.14194	0.910156	1.20966	1.11853	0.488428	0.990149	0.931234	0.838085
2018#	RnPV4	MH892425	Pipapillomavirus	Pipapillomavirus 2	NPA-PV	Yes	No	7370	529	225	Group 2	Group 2	Group 2	Rattus norvegicus	Brown rat		6858	46.5969	2.58871	178	0.551709	0.444694	0.498201	0.402428	54.37	58.2563	1.00461	0.950301	1.1607	0.898239	1.21447	1.09313	0.48208	1.01108	0.961452	0.798207
2013	MmuPV1	GU808564	Pipapillomavirus	Pipapillomavirus 2	NPA-PV	Yes	No	7510	530	221	Group 2	Group 2	Group 2	Mus musculus	Mice	MusPV1	6900	46.7621	2.55854	177	0.536355	0.434022	0.485189	0.434919	54.57	59.4711	1.00574	0.937148	1.16243	0.907731	1.21469	1.10263	0.471786	0.968502	1.01287	0.834131
2017	PsuPV1	LM653111	Pipapillomavirus	Pipapillomavirus 1	NPA-PV	Yes	No	7630	531	218	Group 2	Group 2	Group 2	Phodopus sungorus	Hamster	PcaPV1	7059	47.8734	2.86845	203	0.558914	0.434516	0.496715	0.445466	55.99	59.7516	0.994305	0.892387	1.13927	0.977835	1.22307	1.10484	0.50388	1.01469	1.00279	0.788106
2004	MaPV1	E15111	Pipapillomavirus	Pipapillomavirus 1	NPA-PV	Yes	No	7647	532	219	Group 2	Group 2	Group 2	Mesocricetus auratus	Syrian Golden hamster		7053	47.2352	2.58804	183	0.557692	0.437937	0.497815	0.424825	55.7	59.1487	1.02405	0.926039	1.09173	0.961394	1.29146	1.10797	0.465751	0.953275	1.03076	0.757709
2018#	OjPV1	MH049343	Deltapapillomavirus	Deltapapillomavirus 7	NPA-PV	Yes	No	7752	533	615	Group 2	Group 2	Group 2	Okapia johnstoni	Okapi		6828	45.6033	2.24949	154	0.541118	0.4398	0.490459	0.386188	52.65	57.5199	1.08899	0.965691	1.11879	0.846173	1.3449	1.01423	0.436752	0.942138	1.10606	0.674947
2004	RtPV1	AF443292	Deltapapillomavirus	Deltapapillomavirus 1	NPA-PV	Yes	No	8090	534	623	Group 2	Group 2	Group 2	Rangifer tarandus	Reindeer	RtPV,RPV	6684	46.046	2.53656	170	0.542632	0.4481	0.495366	0.387396	55.13	57.5685	1.13892	0.910499	1.09548	0.858249	1.27686	1.08517	0.48186	0.914102	1.12812	0.699772
2013	CdPV2	HQ912791	Deltapapillomavirus	Deltapapillomavirus 6	NPA-PV	Yes	No	7906	535	614	Group 2	Group 2	Group 2	Camelus dromedarius	Camel		6939	47.4774	3.10479	216	0.545657	0.459243	0.50245	0.42049	55.67	58.9723	1.12131	0.953412	1.0514	0.87954	1.27045	1.09299	0.553481	0.85196	1.12746	0.772484
2013	CdPV1	HQ912790	Deltapapillomavirus	Deltapapillomavirus 6	NPA-PV	Yes	No	7679	536	613	Group 2	Group 2	Group 2	Camelus dromedarius	Camel		6921	46.1738	2.9399	204	0.544723	0.46288	0.503801	0.373435	54.4	56.8579	1.09132	0.974144	1.06576	0.876251	1.24783	1.08287	0.554843	0.850056	1.12872	0.82635
2004	SfPV1	K02708	Kappapapillomavirus	Kappapapillomavirus 2	NPA-PV	Yes	No	7868	537	550	Group 2	Group 2	Group 2	Sylvilagus floridanus	Cottontail rabbit	CRPV,SPV	6777	46.6961	2.69316	183	0.550546	0.431239	0.490893	0.420765	53.97	59.0084	1.05974	0.915255	1.13047	0.907942	1.257	1.06367	0.496232	0.996847	1.04127	0.723843
2017	RalPV1	KT626573	Deltapapillomavirus	Deltapapillomavirus 5	NPA-PV	Yes	No	8029	538	620	Group 2	Group 2	Group 2	Rusa alfredi	Visayan spotted deer	DE1641-14	6804	48.5488	2.49194	170	0.564243	0.450389	0.507316	0.444444	54.5	59.7255	1.03326	0.917806	1.16193	0.892297	1.3192	1.06721	0.425287	0.971795	1.05571	0.692529
2010	CcaPV1	EF680235	Deltapapillomavirus	Deltapapillomavirus 5	NPA-PV	Yes	No	8032	539	619	Group 2	Group 2	Group 2	Capreolus capreolus	Western Roe deer	RdPV1,CcPV1	6765	47.7222	2.38832	162	0.550206	0.453462	0.501834	0.428702	54.32	59.2826	1.05191	0.927769	1.14523	0.881628	1.32842	1.06165	0.422141	0.962044	1.06578	0.682829
2004	OvPV1	M11910	Deltapapillomavirus	Deltapapillomavirus 2	NPA-PV	Yes	No	8374	540	621	Group 2	Group 2	Group 2	Odocoileus virginianus	American White-tailed Deer	DPV	6816	48.405	2.82411	193	0.548564	0.45326	0.500912	0.450524	56.33	59.8993	1.04769	0.908153	1.12611	0.921157	1.25149	1.11539	0.484041	0.95854	1.03078	0.755878
2004	AaPV1	M15953	Deltapapillomavirus	Deltapapillomavirus 1	NPA-PV	Yes	No	8095	541	622	Group 2	Group 2	Group 2	Alces Alces	European elk	EEPV	6717	48.3445	3.29621	222	0.559557	0.462142	0.510849	0.429363	55.98	59.2826	1.08731	0.885901	1.10113	0.927662	1.2355	1.07617	0.567867	0.946546	1.11015	0.744365
2017	GcPV1	KX954132	Deltapapillomavirus	Deltapapillomavirus 7	NPA-PV	Yes	No	7688	542	616	Group 2	Group 2	Group 2	Giraffa camelopardalis	Giraffa		6774	50.1914	3.18021	216	0.572669	0.456124	0.514397	0.480804	54.34	60.3974	1.10028	0.941121	1.17081	0.789888	1.32157	1.00641	0.50729	0.89165	1.16489	0.687274
2010	UmPV1	EF536349	Omegapapillomavirus	Omegapapillomavirus 1	NPA-PV	Yes	No	7582	543	89	Group 2	Group 2	Group 2	Ursus maritimus	Polar bear		6588	49.0837	3.19552	211	0.551724	0.439773	0.495749	0.484648	55.86	60.4328	1.09008	0.957462	1.07866	0.881821	1.29197	1.08499	0.531613	0.816873	1.15141	0.811087
2017	TmPV3	KP205502	Rhopapillomavirus	Rhopapillomavirus 2	NPA-PV	Yes	No	7622	544	593	Group 2	Group 1	Group 2	Trichechus manatus latirostris	Caribbean manatee		7011	44.9851	2.98762	210	0.542365	0.448808	0.495587	0.353928	53.2	55.7972	1.04539	0.992198	0.980701	0.979759	1.15431	1.24435	0.590846	0.915167	0.869388	0.900472
2010	TmPV1	AY609301	Rhopapillomavirus	Rhopapillomavirus 1	NPA-PV	Yes	No	7722	545	594	Group 2	Group 1	Group 2	Trichechus manatus latirostris	Caribbean manatee		6930	45.3656	3.28152	228	0.543226	0.445187	0.494207	0.372549	55.16	56.8579	0.969178	0.958145	1.00925	1.06018	1.13003	1.19447	0.639323	0.927949	0.944964	0.984728
2015	FgPV1	KJ452243	Treiszetapapillomavirus	Treiszetapapillomavirus 1	NPA-PV	Yes	No	8132	546	633	Group 2	Group 2	Group 2	Fulmarus glacialis	Northern fulmar		6051	49.0351	4.51921	274	0.558929	0.440556	0.499743	0.474009	59.04	60.3176	1.0579	0.992618	1.0045	0.952143	1.13649	1.10165	0.753142	0.925299	0.984032	0.888155
2010	CgPV2	GU014533	Betapapillomavirus	Betapapillomavirus 1	NHP-PV	Yes	No	7686	547	136	Group 2	Group 2	Group 2	Colobus guereza	Colobus monkey		7140	47.4155	3.74406	268	0.547537	0.441227	0.494382	0.434745	56.21	59.4711	1.1004	0.944687	1.00296	0.950985	1.20355	1.10484	0.670506	0.849434	1.13085	0.85548
2010	CmPV1	EU493091	Dyozetapapillomavirus	Dyozetapapillomavirus 1	NPA-PV	Yes	No	6953	548	635	Group 2	Group 2	Group 2	Chelonia mydas	Green seaturtle		6372	47.3396	4.00626	256	0.544656	0.45632	0.500488	0.421181	56.83	59.0084	1.16364	0.882624	0.949166	0.987941	1.24296	1.07121	0.715245	0.852492	1.22374	0.750564
2010	CcPV1	EU493092	Dyozetapapillomavirus	Dyozetapapillomavirus 1	NPA-PV	Yes	No	7020	549	634	Group 2	Group 2	Group 2	Caretta caretta	Loggerhead turtle		6321	47.3576	4.11737	261	0.549754	0.442857	0.496305	0.433498	58.86	59.4099	1.13965	0.937782	0.946641	0.964905	1.18457	1.11981	0.734948	0.904878	1.05596	0.780136
2010	MfPV9	EU490516	Alphapapillomavirus	Alphapapillomavirus 12	NHP-PV	Yes	Yes	7988	550	44	Group 2	Group 2	Group 2	Macaca fascicularis	Cynomolgus macaque		6633	46.5795	2.69132	179	0.545837	0.431712	0.488775	0.420954	53.32	59.0084	1.08639	1.04534	0.959535	0.913704	1.37163	1.12402	0.497821	0.715422	1.15417	0.841625
2017	MfuPV1	KT944080	Alphapapillomavirus	Alphapapillomavirus 12	NHP-PV	Yes	Yes	7898	551	43	Group 2	Group 2	Group 2	Macaca fuscata	Japanese macaque	OSCC1	6627	47.7351	3.03988	202	0.55519	0.442931	0.499061	0.435885	53.29	59.501	1.03682	1.04473	0.961491	0.961493	1.34874	1.1267	0.535511	0.741929	1.11079	0.883953
2010	MfPV5	EF558843	Alphapapillomavirus	Alphapapillomavirus 12	NHP-PV	Yes	Yes	7990	552	45	Group 2	Group 2	Group 2	Macaca fascicularis	Cynomolgus macaque	MfPV-a	6666	46.8282	2.73788	183	0.546897	0.430238	0.488567	0.429305	52.87	59.2826	1.03719	1.01906	0.986615	0.961822	1.34112	1.12845	0.501846	0.755884	1.13258	0.880961
2010	MfPV11	GQ227670	Alphapapillomavirus	Alphapapillomavirus 12	NHP-PV	Yes	Yes	8014	553	40	Group 2	Group 2	Group 2	Macaca fascicularis	Cynomolgus macaque	RhPV-b	6681	51.3211	3.20943	215	0.566091	0.453059	0.509575	0.528258	52.7	60.3467	1.03564	1.01698	1.00862	0.945863	1.4233	1.10291	0.489799	0.761242	1.11173	0.775506
2010	MfPV3	EF558839	Alphapapillomavirus	Alphapapillomavirus 12	NHP-PV	Yes	Yes	7935	554	48	Group 2	Group 2	Group 2	Macaca fascicularis	Cynomolgus macaque	RhPV-d	6615	49.7663	3.36198	223	0.5625	0.43515	0.498825	0.49812	53.75	60.4971	1.00252	1.07586	0.968512	0.962516	1.34844	1.13709	0.54589	0.74538	1.04772	0.911857
2010	MfPV8	EF558842	Alphapapillomavirus	Alphapapillomavirus 12	NHP-PV	Yes	Yes	8001	555	41	Group 2	Group 2	Group 2	Macaca fascicularis	Cynomolgus macaque	RhPV-a	6624	50.0151	3.11653	207	0.562736	0.451887	0.507311	0.492925	53.97	60.4816	1.01115	1.01897	0.98645	0.988858	1.40801	1.10743	0.502837	0.772057	1.11013	0.81193
2010	MfPV7	EF558838	Alphapapillomavirus	Alphapapillomavirus 12	NHP-PV	Yes	Yes	8063	556	39	Group 2	Group 2	Group 2	Macaca fascicularis	Cynomolgus macaque		6678	49.9403	2.85245	191	0.568352	0.447566	0.507959	0.488764	53.22	60.4609	1.04291	1.00717	0.977301	0.976417	1.41577	1.1485	0.460714	0.729989	1.12163	0.813681
2010	MfPV10	EU490515	Alphapapillomavirus	Alphapapillomavirus 12	NHP-PV	Yes	Yes	7920	557	49	Group 2	Group 2	Group 2	Macaca fascicularis	Cynomolgus macaque		6627	49.6764	3.20542	213	0.566259	0.43938	0.50282	0.490132	54.31	60.4668	1.04943	1.00049	0.977618	0.977128	1.3352	1.16354	0.521995	0.740437	1.10281	0.879176
2010	MfPV4	EF558841	Alphapapillomavirus	Alphapapillomavirus 12	NHP-PV	Yes	Yes	7950	558	46	Group 2	Group 2	Group 2	Macaca fascicularis	Cynomolgus macaque		6669	49.7832	3.26006	218	0.566636	0.444082	0.505359	0.486486	54.95	60.4406	1.02948	1.03247	0.995383	0.947663	1.36506	1.11025	0.529417	0.777643	1.08798	0.833085
2004	MmPV1	M60184	Alphapapillomavirus	Alphapapillomavirus 12	NHP-PV	Yes	Yes	8028	559	50	Group 2	Group 2	Group 2	Macaca mulatta	Rhesus macaque	RhPV-1	6702	49.1518	3.02083	203	0.564875	0.437905	0.50139	0.474513	53.66	60.3304	1.04404	1.04435	0.997906	0.919924	1.4004	1.08778	0.50365	0.744262	1.1388	0.820285
2010	MfPV6	EF558840	Alphapapillomavirus	Alphapapillomavirus 12	NHP-PV	Yes	Yes	7943	560	42	Group 2	Group 2	Group 2	Macaca fascicularis	Cynomolgus macaque		6651	48.9129	2.87899	192	0.561101	0.426772	0.493937	0.483209	53.81	60.416	1.06634	1.02493	1.01893	0.898322	1.37777	1.10433	0.484051	0.765694	1.11937	0.801081
2018#	MmPV2	MG837557	Alphapapillomavirus	Alphapapillomavirus 15	NHP-PV	Yes	Yes	7876	561	52	Group 2	Group 2	Group 2	Macacca mulatta	Rhesus macaque		6705	51.3164	3.68883	248	0.570432	0.446769	0.508601	0.531846	53.13	60.2954	1.06689	0.964524	0.981195	0.995111	1.2896	1.18277	0.56141	0.670404	1.16583	0.979957
2013	PhPV1	JF304764	Alphapapillomavirus	Alphapapillomavirus 12	NHP-PV	Yes	No	8008	562	47	Group 2	Group 2	Group 2	Papio hamadryas	Baboon macaque	PhfPV1,Mac2085	6657	50.7566	3.77528	252	0.569897	0.441752	0.505825	0.514911	53.84	60.4628	1.04162	1.06931	0.929052	0.965893	1.32105	1.17118	0.589228	0.689296	1.06856	0.953446
2018#	MmPV3	MG837558	Alphapapillomavirus	Alphapapillomavirus 16	NHP-PV	Yes	Yes	8051	563	54	Group 2	Group 2	Group 2	Macacca mulatta	Rhesus macaque		6777	53.142	3.82634	260	0.579743	0.458753	0.519248	0.562786	51.94	59.6566	1.0255	0.939693	1.02362	1.02081	1.33685	1.1402	0.543014	0.74348	1.14033	0.88614
2018#	MmPV6	MH745748	Alphapapillomavirus	Alphapapillomavirus 15	NHP-PV	Yes	Yes	7935	564	53	Group 2	Group 2	Group 2	Macacca mulatta	Rhesus macaque		6693	52.9429	4.02325	270	0.583761	0.45217	0.517965	0.561829	51.91	59.6837	0.990537	0.968936	1.01678	1.03008	1.32302	1.12383	0.576374	0.733281	1.14421	0.948975
2010	CgPV1	GU014532	Alphapapillomavirus	Alphapapillomavirus 14	NHP-PV	Yes	No	8061	565	71	Group 2	Group 2	Group 2	Colobus guereza	Colobus monkey		6795	52.7814	3.80156	259	0.593878	0.458657	0.526268	0.536775	53.09	60.2211	1.01513	0.992945	1.00944	0.986061	1.34631	1.13592	0.547083	0.756193	1.08994	0.872386
2004	HPV57	X55965	Alphapapillomavirus	Alphapapillomavirus 4	Alpha-HPV-LR2	Yes	Yes	7861	566	65	Group 2	Group 2	Group 2	Homo sapiens	human being		6690	51.1479	1.87266	256	0.473048	0.427974	0.450511	0.258829	45.49	49.3245	0.925739	0.992771	1.01186	1.07532	1.28273	1.13512	0.586125	0.866288	1.00282	0.922064
2004	HPV27	X74473	Alphapapillomavirus	Alphapapillomavirus 4	Alpha-HPV-LR2	Yes	Yes	7823	567	66	Group 2	Group 2	Group 2	Homo sapiens	human being		6675	49.619	3.21196	221	0.560683	0.446701	0.503692	0.416705	55.46	58.8616	0.946524	1.0029	1.03398	1.02054	1.2838	1.14088	0.53902	0.861846	0.999993	0.91187
2004	HPV2	X55964	Alphapapillomavirus	Alphapapillomavirus 4	Alpha-HPV-LR2	Yes	Yes	7860	568	67	Group 2	Group 2	Group 2	Homo sapiens	human being		6723	49.503	3.27845	221	0.558646	0.454798	0.506722	0.475661	56.1	60.3427	0.927328	1.02072	1.05751	0.998895	1.27946	1.12112	0.537895	0.878295	0.985736	0.919543
2004	HPV40	X74478	Alphapapillomavirus	Alphapapillomavirus 8	Alpha-HPV-LR1	Yes	Yes	7909	569	9	Group 2	Group 2	Group 2	Homo sapiens	human being	Xg	6762	44.882	3.27495	176	0.557565	0.428319	0.492942	0.431848	56.09	59.3787	0.998175	1.06007	0.926522	1.01507	1.3236	1.17737	0.518452	0.717846	1.10171	0.970255
2004	HPV71	AB040456	Alphapapillomavirus	Alphapapillomavirus 14	Alpha-HPV-LR2	Yes	Yes	8037	570	68	Group 2	Group 2	Group 2	Homo sapiens	human being	CP8061	6732	45.3926	2.77655	177	0.552801	0.451331	0.502066	0.406336	53.25	58.426	1.02344	1.05548	0.959854	0.967519	1.29933	1.17915	0.511544	0.681341	1.14158	0.995448
2010	HPV102	DQ080083	Alphapapillomavirus	Alphapapillomavirus 3	Alpha-HPV-LR2	Yes	Yes	8078	571	83	Group 2	Group 2	Group 2	Homo sapiens	human being		6756	46.398	2.70151	183	0.548506	0.447816	0.498161	0.395402	52.57	57.9452	1.01732	1.04944	0.946156	0.990432	1.32011	1.19044	0.505077	0.69092	1.11503	0.975989
2004	HPV89	AF436128	Alphapapillomavirus	Alphapapillomavirus 3	Alpha-HPV-LR2	Yes	Yes	8078	572	81	Group 2	Group 2	Group 2	Homo sapiens	human being	CP6108,AE6,X06/X08,NM3	6711	47.6445	1.8187	192	0.523516	0.425495	0.474505	0.278681	48.08	50.7998	0.97263	1.04497	0.941307	1.04197	1.294	1.23864	0.504075	0.658915	1.08954	1.07242
2004	HPV81	AJ620209	Alphapapillomavirus	Alphapapillomavirus 3	Alpha-HPV-LR2	Yes	Yes	8070	573	72	Group 2	Group 2	Group 2	Homo sapiens	human being	AE7,CP8304,NM5	6750	46.3652	1.93694	171	0.485047	0.437383	0.461215	0.299065	48.82	52.23	1.0252	1.01601	0.958968	0.998946	1.28219	1.25091	0.472888	0.665455	1.12276	1.0216
2004	HPV62	AY395706	Alphapapillomavirus	Alphapapillomavirus 3	Alpha-HPV-LR2	Yes	Yes	8092	574	73	Group 2	Group 2	Group 2	Homo sapiens	human being	NM4186,NM2	6759	47.3513	1.82729	193	0.518756	0.413998	0.466377	0.272187	48.83	50.2878	1.02635	1.03936	0.929271	1.00469	1.28677	1.25172	0.510351	0.665287	1.08152	1.01965
2004	HPV83	AF151983	Alphapapillomavirus	Alphapapillomavirus 3	Alpha-HPV-LR2	Yes	Yes	8104	575	82	Group 2	Group 2	Group 2	Homo sapiens	human being	MM7,LVX82,Pap291	6747	47.0953	3.06122	196	0.551199	0.449723	0.500461	0.424815	53.65	59.1487	0.980217	1.04299	0.971794	1.00908	1.27081	1.20497	0.524574	0.694139	1.09465	1.05359
2004	HPV87	AJ400628	Alphapapillomavirus	Alphapapillomavirus 3	Alpha-HPV-LR2	Yes	Yes	7999	576	78	Group 2	Group 2	Group 2	Homo sapiens	human being		6735	46.6459	1.90142	177	0.508137	0.413201	0.460669	0.270796	48.35	50.2142	1.00398	1.04245	0.959151	0.996708	1.26855	1.2577	0.484567	0.689018	1.054	1.03424
2004	HPV86	AF349909	Alphapapillomavirus	Alphapapillomavirus 3	Alpha-HPV-LR2	Yes	Yes	7983	577	77	Group 2	Group 2	Group 2	Homo sapiens	human being	Han2294	6753	47.0093	2.62106	189	0.541628	0.446346	0.493987	0.412581	52.7	58.7086	0.997209	1.00196	0.952159	1.04662	1.27113	1.24306	0.507227	0.712637	1.08155	1.01918
2010	HPV114	GQ244463	Alphapapillomavirus	Alphapapillomavirus 3	Alpha-HPV-LR2	Yes	Yes	8070	578	79	Group 2	Group 2	Group 2	Homo sapiens	human being	SW1	6768	46.5517	2.78515	189	0.549425	0.453333	0.501379	0.394483	52.27	57.8994	1.02034	0.987899	0.951179	1.03353	1.25679	1.24714	0.516218	0.70835	1.10618	1.01079
2004	HPV84	AF293960	Alphapapillomavirus	Alphapapillomavirus 3	Alpha-HPV-LR2	Yes	Yes	7948	579	80	Group 2	Group 2	Group 2	Homo sapiens	human being	AE6,Pap155,MM8	6744	47.4564	1.72109	207	0.484904	0.424977	0.454941	0.232388	45.12	47.2877	1.04667	1.00823	0.931129	1.00866	1.24665	1.25946	0.545724	0.676106	1.09408	1.02369
2004	HPV61	U31793	Alphapapillomavirus	Alphapapillomavirus 3	Alpha-HPV-LR2	Yes	Yes	7989	580	76	Group 2	Group 2	Group 2	Homo sapiens	human being	AE4,Xd,MM3,NMT219	6711	47.3324	2.84787	185	0.548713	0.445312	0.497013	0.427849	52.91	59.2497	1.00507	1.0349	0.939515	1.02086	1.31627	1.22451	0.493198	0.695098	1.0797	0.986474
2018#	HPVEV06c12b	MF588676	Alphapapillomavirus	Alphapapillomavirus 3	Alpha-HPV-LR2	Yes	No	8037	581	75	Group 2	Group 2	Group 2	Homo sapiens	human being		6741	47.6402	1.37533	195	0.478241	0.410444	0.444343	0.23454	43.85	47.5157	1.03615	1.03204	0.93002	0.999968	1.32385	1.21251	0.511358	0.697515	1.0909	0.945857
2004	HPV72	X94164	Alphapapillomavirus	Alphapapillomavirus 3	Alpha-HPV-LR2	Yes	Yes	7989	582	74	Group 2	Group 2	Group 2	Homo sapiens	human being	CP4173,LVX100	6756	47.0241	1.49611	188	0.469521	0.420661	0.445091	0.214053	42.37	45.9156	1.02934	1.03631	0.984139	0.953993	1.30547	1.17148	0.504285	0.712612	1.11586	0.956104
2010	HPV106	DQ080082	Alphapapillomavirus	Alphapapillomavirus 14	Alpha-HPV-LR2	Yes	Yes	8035	583	69	Group 2	Group 2	Group 2	Homo sapiens	human being		6732	48.2074	3.03704	205	0.564375	0.451777	0.508076	0.431472	54.41	59.3471	1.01068	1.02294	0.944622	1.02489	1.31725	1.19592	0.524377	0.695412	1.11014	0.982648
2004	HPV90	AY057438	Alphapapillomavirus	Alphapapillomavirus 14	Alpha-HPV-LR2	Yes	Yes	8033	584	70	Group 2	Group 2	Group 2	Homo sapiens	human being	AE11,Han831,Han353,JC9710	6732	47.9852	2.03506	193	0.499074	0.429167	0.46412	0.297685	47.94	52.1598	1.00863	1.02448	0.963936	1.00495	1.3082	1.20831	0.497471	0.708706	1.08258	0.978557
2004	HPV78	KC138720	Alphapapillomavirus	Alphapapillomavirus 2	Alpha-HPV-LR2	Yes	Yes	7805	585	58	Group 2	Group 2	Group 2	Homo sapiens	human being	FAIMVS3,XS2	6756	46.6637	2.225	200	0.52172	0.433978	0.477849	0.343226	52.67	55.1377	0.998422	1.08425	0.944269	0.978928	1.32387	1.15116	0.546555	0.792427	0.997463	0.901864
2004	HPV10	X74465	Alphapapillomavirus	Alphapapillomavirus 2	Alpha-HPV-LR2	Yes	Yes	7919	586	59	Group 2	Group 2	Group 2	Homo sapiens	human being		6792	47.2394	3.12775	213	0.553677	0.454089	0.503883	0.409319	54.81	58.5494	0.982228	1.04283	0.961521	1.01733	1.30324	1.14365	0.564889	0.80009	1.03961	0.928309
2010	HPV117	GQ246950	Alphapapillomavirus	Alphapapillomavirus 2	Alpha-HPV-LR2	Yes	Yes	7895	587	61	Group 2	Group 2	Group 2	Homo sapiens	human being		6789	47.3042	3.27604	223	0.560183	0.456293	0.508238	0.401831	54.42	58.2563	0.973444	1.06553	0.983025	0.986141	1.2777	1.12395	0.591378	0.815651	1.01834	0.94576
2004	HPV29	U31784	Alphapapillomavirus	Alphapapillomavirus 2	Alpha-HPV-LR2	Yes	Yes	7916	588	56	Group 2	Group 2	Group 2	Homo sapiens	human being		6786	47.1928	3.14159	208	0.550711	0.44424	0.497476	0.402937	54.32	58.2993	0.99612	1.07924	0.9837	0.950371	1.31396	1.11788	0.552983	0.786724	1.0395	0.916505
2004	HPV77	Y15175	Alphapapillomavirus	Alphapapillomavirus 2	Alpha-HPV-LR2	Yes	Yes	7887	589	55	Group 2	Group 2	Group 2	Homo sapiens	human being	vs93-1	6786	47.3839	2.95247	215	0.545455	0.449495	0.497475	0.402663	53.76	58.2993	0.99275	1.06936	0.979754	0.96491	1.30162	1.1246	0.567171	0.815873	1.01036	0.903139
2004	HPV3	X74462	Alphapapillomavirus	Alphapapillomavirus 2	Alpha-HPV-LR2	Yes	Yes	7820	590	63	Group 2	Group 2	Group 2	Homo sapiens	human being		6762	46.6077	2.04142	213	0.498609	0.420686	0.459647	0.316327	49.14	53.3982	1.00786	1.07041	0.970841	0.961159	1.30275	1.10809	0.582936	0.798958	1.04819	0.907068
2004	HPV28	U31783	Alphapapillomavirus	Alphapapillomavirus 2	Alpha-HPV-LR2	Yes	Yes	7959	591	64	Group 2	Group 2	Group 2	Homo sapiens	human being		6738	47.4541	3.05703	217	0.562127	0.448418	0.505273	0.406236	54.86	58.426	0.988539	1.06137	0.968764	0.988399	1.31068	1.12004	0.57449	0.813239	1.02455	0.902264
2013	HPV125	FN547152	Alphapapillomavirus	Alphapapillomavirus 2	Alpha-HPV-LR2	Yes	Yes	7809	592	62	Group 2	Group 2	Group 2	Homo sapiens	human being	SIBX9	6756	47.5199	3.11485	211	0.556015	0.443985	0.5	0.426079	55.17	59.1828	1.02162	1.05485	0.944751	0.982723	1.34964	1.12312	0.55461	0.82281	1.01722	0.825401
2004	HPV94	AJ620211	Alphapapillomavirus	Alphapapillomavirus 2	Alpha-HPV-LR2	Yes	Yes	7881	593	60	Group 2	Group 2	Group 2	Homo sapiens	human being	DL40	6771	47.4149	1.58938	223	0.496169	0.417756	0.456963	0.259126	46.42	49.3245	1.00145	1.0173	0.96177	1.01976	1.32214	1.10071	0.588722	0.831801	1.07448	0.861555
2015	HPV160	AB745694	Alphapapillomavirus	Alphapapillomavirus 2	Alpha-HPV-LR2	Yes	Yes	7779	594	57	Group 2	Group 2	Group 2	Homo sapiens	human being		6729	48.3326	3.33482	225	0.561922	0.451479	0.506701	0.437616	56.3	59.5597	0.953848	1.05171	0.968618	1.03005	1.33779	1.10143	0.573951	0.83211	1.02801	0.889591
2013	SscPV3	JF304767	Dyoomikronpapillomavirus	Dyoomikronpapillomavirus 1	NHP-PV	Yes	No	7664	595	86	Group 2	Group 2	Group 2	Saimiri sciureus	Squirrel monkey	Mac2167.2	6834	48.1173	2.68535	184	0.57286	0.469945	0.521403	0.399818	52.05	58.1692	0.940129	1.03357	1.22649	0.822448	1.39369	0.867357	0.464785	0.782195	1.33373	0.900984
2013	SscPV2	JF304766	Dyoomikronpapillomavirus	Dyoomikronpapillomavirus 1	NHP-PV	Yes	No	7657	596	85	Group 2	Group 2	Group 2	Saimiri sciureus	Squirrel monkey	Mac2167.1	6852	48.9956	2.76565	190	0.577063	0.458296	0.517679	0.435177	53.13	59.4711	0.944498	1.03448	1.21272	0.821307	1.4061	0.894983	0.461499	0.74557	1.33592	0.913564
2013	SscPV1	JF304765	Dyoomikronpapillomavirus	Dyoomikronpapillomavirus 1	NHP-PV	Yes	No	7596	597	87	Group 2	Group 2	Group 2	Saimiri sciureus	Squirrel monkey	Mac2166	6756	47.6528	2.53912	172	0.557914	0.468389	0.513152	0.403323	52.41	58.2993	0.961087	1.05932	1.17649	0.827285	1.39546	0.924438	0.44854	0.750399	1.28825	0.90958
2018#	AmPV2	MF327536	Omegapapillomavirus	Omegapapillomavirus 1	NPA-PV	Yes	No	7582	598	88	Group 2	Group 2	Group 2	Ailuropoda melanoleuca	Giant panda		6639	46.4833	3.17102	211	0.540769	0.434396	0.487582	0.418463	53.71	58.8989	1.10299	0.977483	1.10193	0.831798	1.2433	1.01549	0.59228	0.749122	1.31087	0.907799
2017	EcPV8	KU963288	Treiskappapapillomavirus	Treiskappapapillomavirus 1	NPA-PV	Yes	No	8155	599	598	Group 2	Group 2	Group 2	Equus ferus caballus	Domestic horse		7680	55.5599	5.6768	437	0.624444	0.491704	0.558074	0.557669	54.89	59.7879	1.19845	0.972271	1.09538	0.7168	1.15536	1.06384	0.736695	0.80707	1.11431	0.848564
2010	EcPV2	EU503122	Dyoiotapapillomavirus	Dyoiotapapillomavirus 1	NPA-PV	Yes	No	7803	600	600	Group 2	Group 2	Group 2	Equus ferus caballus	Domestic horse		6915	56.5845	4.84639	336	0.623091	0.469003	0.546047	0.619048	52.5	57.5098	1.10804	0.93589	1.1179	0.820646	1.30109	1.07307	0.608995	0.933541	1.03312	0.584863
2013	EcPV4	JQ031032	Dyoiotapapillomavirus	Dyoiotapapillomavirus 2	NPA-PV	Yes	No	7554	601	602	Group 2	Group 2	Group 2	Equus ferus caballus	Domestic horse		6813	55.3067	5.1237	350	0.601003	0.486092	0.543548	0.579115	55.33	59.1664	1.18726	0.868219	1.14183	0.801285	1.20698	1.0481	0.672781	0.932181	1.11682	0.639854
2010	SsPV1	EF395818	Dyodeltapapillomavirus	Dyodeltapapillomavirus 1	NPA-PV	Yes	No	7260	602	96	Group 2	Group 2	Group 2	Sus scrofa	Domestic pig		6474	54.9391	4.0376	262	0.582893	0.480538	0.531716	0.591062	53.44	58.7314	0.957817	0.958653	1.0595	1.02359	1.28733	1.18045	0.535446	0.911343	0.92579	0.801206
2004	EcPV1	AF498323	Zetapapillomavirus	Zetapapillomavirus 1	NPA-PV	Yes	No	7610	603	603	Group 2	Group 2	Group 2	Equus ferus caballus	Domestic horse		6738	52.8863	3.90764	264	0.596109	0.452061	0.524085	0.544233	54.81	60.0983	1.03359	0.874436	1.09661	0.998397	1.15958	1.21294	0.563916	0.918395	0.980445	0.878269
2010	CPV4	EF584537	Chipapillomavirus	Chipapillomavirus 2	NPA-PV	Yes	No	7742	604	583	Group 2	Group 2	Group 2	Canis familiaris	Domestic dog		7119	53.2997	4.59577	328	0.592932	0.465096	0.529014	0.545812	55.4	60.0592	1.00481	1.00536	1.01887	0.970295	1.20688	1.15511	0.650672	0.956949	0.882771	0.8103
2013	CPV15	JX899359	Chipapillomavirus	Chipapillomavirus 3	NPA-PV	Yes	No	7776	605	580	Group 2	Group 2	Group 2	Canis familiaris	Domestic dog		7251	53.1022	4.60861	335	0.604193	0.470261	0.537227	0.52546	56.41	60.3804	1.06458	0.946828	1.03521	0.958823	1.1921	1.14551	0.65587	0.981078	0.920176	0.740452
2013	CPV14	JQ701802	Chipapillomavirus	Chipapillomavirus 3	NPA-PV	Yes	No	7826	606	581	Group 2	Group 2	Group 2	Canis familiaris	Domestic dog		7230	53.67	4.63576	336	0.608677	0.476804	0.542741	0.531787	56.91	60.2954	1.02201	0.947711	1.10973	0.913738	1.20073	1.08825	0.645932	0.969905	0.986199	0.782098
2017	CPV20	KT901797	Chipapillomavirus	Chipapillomavirus 1	NPA-PV	Yes	No	7839	607	591	Group 2	Group 2	Group 2	Canis familiaris	Domestic dog	Ada	7125	52.359	4.18592	299	0.580841	0.459471	0.520156	0.534027	56.54	60.267	1.00911	0.985534	1.07758	0.92192	1.18758	1.14798	0.613411	0.945125	0.919091	0.845299
2013	CPV12	JQ754321	Chipapillomavirus	Chipapillomavirus 1	NPA-PV	Yes	No	7890	608	586	Group 2	Group 2	Group 2	Canis familiaris	Domestic dog		7122	52.0308	3.9916	285	0.576205	0.466348	0.521277	0.521928	55.38	60.4099	1.02499	0.9663	1.08751	0.917664	1.19637	1.14851	0.592023	0.933753	0.947237	0.834684
2013	CPV11	JF800658	Chipapillomavirus	Chipapillomavirus 1	NPA-PV	Yes	No	7827	609	590	Group 2	Group 2	Group 2	Canis familiaris	Domestic dog		7137	51.2229	3.85744	276	0.570744	0.46539	0.518067	0.505442	55.94	60.4992	0.982189	0.964378	1.05052	1.00543	1.20939	1.16443	0.590065	0.971091	0.900063	0.830778
2013	CPV9	JF800656	Chipapillomavirus	Chipapillomavirus 1	NPA-PV	Yes	No	7873	610	585	Group 2	Group 2	Group 2	Canis familiaris	Domestic dog		7095	51.2583	3.9224	279	0.585259	0.467074	0.526167	0.488443	56.28	60.4546	1.02966	0.988113	1.03763	0.944117	1.2132	1.16434	0.599536	0.947599	0.900379	0.801788
2010	CPV3	DQ295066	Chipapillomavirus	Chipapillomavirus 1	NPA-PV	Yes	No	7801	611	587	Group 2	Group 2	Group 2	Canis familiaris	Domestic dog		7101	51.6365	4.38264	312	0.574728	0.459259	0.516993	0.518519	56.44	60.4354	1.05456	0.983214	1.05971	0.90001	1.18796	1.11055	0.660634	0.953965	0.952838	0.794127
2017	CPV18	KT326919	Chipapillomavirus	Chipapillomavirus 1	NPA-PV	Yes	No	7810	612	588	Group 2	Group 2	Group 2	Canis familiaris	Domestic dog		7104	51.1233	4.00168	285	0.572985	0.461002	0.516993	0.503268	56.23	60.5009	0.998002	1.0036	1.07665	0.919216	1.20589	1.11744	0.615655	0.971004	0.911601	0.817866
2013	CPV10	JF800657	Chipapillomavirus	Chipapillomavirus 3	NPA-PV	Yes	No	7774	613	579	Group 2	Group 2	Group 2	Canis familiaris	Domestic dog		7197	51.587	3.90852	282	0.581646	0.468333	0.524989	0.502801	56.32	60.5009	1.0585	0.953421	1.09216	0.894648	1.18983	1.14788	0.590272	0.951201	0.94611	0.792606
2013	CPV8	HQ262536	Chipapillomavirus	Chipapillomavirus 3	NPA-PV	Yes	No	7784	614	582	Group 2	Group 2	Group 2	Canis familiaris	Domestic dog		7194	51.6362	3.99334	288	0.592066	0.471755	0.53191	0.489435	56.44	60.4609	1.09311	0.932779	1.05826	0.917826	1.21594	1.14409	0.60146	0.937221	0.98155	0.744247
2017	CPV16	KP099966	Chipapillomavirus	Chipapillomavirus 2	NPA-PV	Yes	No	7796	615	584	Group 2	Group 2	Group 2	Canis familiaris	Domestic dog		7065	50.6565	3.79783	269	0.577329	0.465729	0.521529	0.480228	57.15	60.3873	0.995039	1.0246	1.06301	0.918372	1.22229	1.13009	0.594576	0.966989	0.881918	0.813482
2010	CPV5	FJ492743	Chipapillomavirus	Chipapillomavirus 1	NPA-PV	Yes	No	7810	616	589	Group 2	Group 2	Group 2	Canis familiaris	Domestic dog		7128	49.8041	3.34453	239	0.571553	0.45933	0.515441	0.46455	55.85	60.1822	1.01748	0.958313	1.124	0.903681	1.18446	1.14977	0.541318	0.96503	0.930886	0.836742
2018#	LwPV4	MG571095	pending	pending	NPA-PV	Yes	No	7836	617	597	Group 2	Group 2	Group 2	Leptonychotes weddellii	Weddell seal		7209	51.3491	3.73599	270	0.587655	0.474925	0.53129	0.480926	56.27	60.3974	1.04527	0.928308	1.0978	0.927054	1.21854	1.13352	0.570415	0.929416	1.00773	0.798296
2013	EcPV7	JX035935	Dyorhopapillomavirus	Dyorhopapillomavirus 1	NPA-PV	Yes	No	7619	618	605	Group 2	Group 2	Group 2	Equus ferus caballus	Domestic horse		6798	52.5968	3.79988	259	0.591034	0.45151	0.521272	0.539799	55.09	60.1712	1.11387	0.882663	1.12628	0.876014	1.24514	1.11583	0.552776	0.876778	1.10769	0.750495
2018#	LwPV3	MG571093	Dyonupapillomavirus	Dyonupapillomavirus 2	NPA-PV	Yes	No	7677	619	576	Group 2	Group 2	Group 2	Leptonychotes weddellii	Weddell seal		6978	50.6002	3.95827	277	0.576565	0.471815	0.52419	0.471372	56.63	60.2765	1.14537	0.959269	1.07017	0.824393	1.23939	1.07827	0.621512	0.868945	1.09494	0.744538
2013	EcPV6	JQ965698	Dyorhopapillomavirus	Dyorhopapillomavirus 1	NPA-PV	Yes	No	7551	620	604	Group 2	Group 2	Group 2	Equus ferus caballus	Domestic horse		6843	51.4794	4.51829	310	0.579067	0.459447	0.519257	0.507476	57.25	60.4956	1.1119	0.899782	1.08884	0.900736	1.13436	1.10766	0.68519	0.882277	1.10294	0.870959
2013	EcPV3	GU384895	Dyorhopapillomavirus	Dyorhopapillomavirus 1	NPA-PV	Yes	No	7582	621	606	Group 2	Group 2	Group 2	Equus ferus caballus	Domestic horse		6828	51.0371	4.25066	291	0.58931	0.452718	0.521014	0.492462	57.14	60.4772	1.06627	0.952791	1.11646	0.863782	1.19362	1.04978	0.657274	0.86628	1.13159	0.87357
2013	EcPV5	JQ031033	Dyoiotapapillomavirus	Dyoiotapapillomavirus 2	NPA-PV	Yes	No	7519	622	601	Group 2	Group 2	Group 2	Equus ferus caballus	Domestic horse		6783	50.6543	3.92589	267	0.590659	0.469322	0.529991	0.461538	57.8	60.1289	1.07968	0.880021	1.14238	0.897042	1.1412	1.11172	0.616061	0.900022	1.10983	0.877699
2015	EaPV1	KF741371	Dyochipapillomavirus	Dyochipapillomavirus 1	NPA-PV	Yes	No	7467	623	607	Group 2	Group 2	Group 2	Equus asinus	Donkey		6612	50.5357	3.86298	256	0.586692	0.462043	0.524367	0.470009	56.74	60.2619	1.08052	0.877723	1.17352	0.867098	1.13971	1.08837	0.606376	0.913942	1.11801	0.864628
2010	FcaPV2	EU796884	Dyothetapapillomavirus	Dyothetapapillomavirus 1	NPA-PV	Yes	No	7899	624	596	Group 2	Group 2	Group 2	Felis catus	Domestic cat	FdPV2	7110	53.381	5.40123	385	0.602179	0.484096	0.543137	0.520261	57.63	60.4273	1.02895	0.984299	0.987681	1.0025	1.16921	1.10479	0.762409	0.899737	1.00202	0.891395
2010	RaPV1	DQ366842	Psipapillomavirus	Psipapillomavirus 1	NPA-PV	Yes	No	7970	625	572	Group 2	Group 2	Group 2	Rousettus aegyptiacus	Egyptian rousette		7089	51.4985	2.70156	192	0.599387	0.455342	0.527364	0.498687	55.65	60.4988	0.911567	0.87091	1.16384	1.05658	1.33735	1.12052	0.409624	0.990337	1.01553	0.743698
2017	MscPV1	JQ814848	Dyoomegapapillomavirus	Dyoomegapapillomavirus 1	NPA-PV	Yes	No	7632	626	574	Group 2	Group 2	Group 2	Miniopterus schreibersii	Bent-wing bat		6921	49.9207	2.43551	169	0.564286	0.445536	0.504911	0.491071	53.34	60.4722	1.00445	0.899267	1.1898	0.909292	1.27396	1.14385	0.394242	0.935007	1.0311	0.789284
2017	EhPV2	KX276957	Psipapillomavirus	Psipapillomavirus 2	NPA-PV	Yes	No	7958	627	571	Group 2	Group 2	Group 2	Talpa europaea	Straw-coloured fruit bat		6978	51.315	3.745	262	0.59528	0.455922	0.525601	0.496438	55.25	60.4923	0.958865	0.940616	1.09739	1.00633	1.25187	1.09977	0.571351	0.920019	1.03585	0.863261
2017	EhPV3	KX276956	Psipapillomavirus	Psipapillomavirus 3	NPA-PV	Yes	No	7991	628	573	Group 2	Group 2	Group 2	Talpa europaea	Straw-coloured fruit bat		7149	49.8116	2.91614	209	0.583659	0.464146	0.523903	0.451977	54.48	59.9224	0.916204	0.930947	1.17317	0.988129	1.26582	1.08757	0.473974	0.943225	1.04773	0.883056
2017	PmPV1	JF755418	Iotapapillomavirus	Iotapapillomavirus 2	NPA-PV	Yes	No	7704	629	629	Group 2	Group 2	Group 2	Peromyscus maniculatus	Deer mouse		7203	50.9763	3.40673	246	0.581325	0.468158	0.524742	0.48537	56.29	60.4328	0.882774	0.933191	1.0817	1.10982	1.20251	1.20228	0.528266	1.02185	0.846085	0.889246
2013	RnPV2	HQ625441	Iotapapillomavirus	Iotapapillomavirus 1	NPA-PV	Yes	No	7724	630	632	Group 2	Group 2	Group 2	Rattus norvegicus	Norweyian rat		7182	50.9167	4.05556	292	0.564467	0.47003	0.517249	0.498491	57.75	60.4971	0.962755	0.966992	1.08925	0.988228	1.14594	1.14754	0.627385	1.00145	0.885214	0.892668
2015	RnPV3	KT945134	Iotapapillomavirus	Iotapapillomavirus 1	NPA-PV	Yes	No	7707	631	631	Group 2	Group 2	Group 2	Rattus norvegicus	Brown rat		7176	50.3614	4.23964	305	0.565142	0.473684	0.519413	0.477135	58.48	60.3545	0.975971	0.946394	1.09653	0.984861	1.10431	1.1334	0.669836	1.00978	0.911417	0.912245
2004	MnPV1	U01834	Iotapapillomavirus	Iotapapillomavirus 1	NPA-PV	Yes	No	7687	632	630	Group 2	Group 2	Group 2	Mastomys natalensis	Multimammate Mouse	MrPV,MmPV	7185	50.118	3.38748	244	0.560468	0.476376	0.518422	0.472475	56.08	60.2907	0.910582	0.948499	1.14064	1.00566	1.18507	1.13638	0.541882	0.996257	0.921644	0.91138
2017	TmPV4	KP205503	Rhopapillomavirus	Rhopapillomavirus 2	NPA-PV	Yes	No	8214	633	592	Group 2	Group 2	Group 2	Trichechus manatus latirostris	Caribbean manatee		7206	47.9934	3.90257	282	0.567382	0.466524	0.516953	0.406009	55.43	58.426	0.976254	0.990247	0.971396	1.0605	1.11444	1.22686	0.678175	0.924822	0.865755	0.988705
2013	TmPV2	JN709473	Rhopapillomavirus	Rhopapillomavirus 1	NPA-PV	Yes	No	7855	634	595	Group 2	Group 2	Group 2	Trichechus manatus latirostris	Caribbean manatee		7104	49.9017	4.49312	320	0.580969	0.464426	0.522698	0.45526	56.51	59.989	0.98573	0.955915	0.946929	1.11393	1.10419	1.22695	0.723891	0.922216	0.898077	0.990412
2015	PaPV1	KJ173785	Treisepsilonpapillomavirus	Treisepsilonpapillomavirus 1	NPA-PV	Yes	No	7637	635	637	Group 2	Group 2	Group 2	Pygoscelis adeliae	Adélie penguin		7173	49.7288	3.90766	281	0.588668	0.474481	0.531574	0.431661	56.37	59.3787	0.877124	0.964567	1.09251	1.06615	1.12143	1.15166	0.634047	0.962342	0.925121	1.03971
2004	PePV1	AF420235	Thetapapillomavirus	Thetapapillomavirus 1	NPA-PV	Yes	No	7304	636	638	Group 2	Group 2	Group 2	Psittacus erithacus	Grey parrot	PePV	6882	49.8333	5.46614	377	0.590171	0.47881	0.534491	0.428765	58.76	59.2826	0.880301	1.06018	0.910551	1.14801	1.06134	1.14785	0.88384	0.93027	0.865085	1.12726
2010	FlPV1	EU188799	Dyoepsilonpapillomavirus	Dyoepsilonpapillomavirus 1	NPA-PV	Yes	No	7498	637	639	Group 2	Group 2	Group 2	Francolinus leucoscepus	Yellownecked francolin		7068	53.4575	6.60457	468	0.62161	0.485564	0.553587	0.500875	58.61	60.5008	0.962885	1.00395	0.983535	1.05083	1.04706	1.0489	0.924913	0.965384	0.978273	1.02215
2017	AgPV1	KP861980	Dyoomikronpapillomavirus	Dyoomikronpapillomavirus 1	NHP-PV	Yes	No	7722	638	84	Group 2*	Group 2	Group 2	Alouatta guariba clamitans	Southern brown howler (New World)	PPV03_SP	6888	59.2383	5.51694	381	0.639027	0.490311	0.564669	0.659306	47.27	55.3325	0.892421	0.979875	1.02425	1.10793	1.3049	1.14465	0.62889	0.719615	1.06135	1.07637
2018#	AmPV3	MF327537	Dyonupapillomavirus	Dyonupapillomavirus ?	NPA-PV	Yes	No	7886	639	578	Group 2*	Group 2	Group 2	Ailuropoda melanoleuca	Giant panda		6924	58.726	7.0183	487	0.638889	0.509857	0.574373	0.624552	53.62	57.2132	1.02192	0.97508	1.06902	0.917509	1.11183	1.05888	0.816242	0.925137	1.01402	0.927703
2013	ZcPV1	HQ293213	Dyonupapillomavirus	Dyonupapillomavirus 1	NPA-PV	Yes	No	7584	640	577	Group 2*	Group 2	Group 2	Zalophus californianus	Sea lions		6834	59.0485	6.83012	468	0.640689	0.485727	0.563208	0.654735	51.06	55.5699	1.03733	0.934275	0.992215	1.07269	1.14672	1.12009	0.783678	0.916169	0.982947	0.873528
# unofficial
& NHP: non-human primate; NP: non-primate

## Sheet: Table S3
Table S3. RSCU values of surveyed 228 human and macaque papillomavirus genes.
Amino acid	Codon	6ORF	E6	E7	E1	E2	L2	L1
Ala (A)	GCA	1.61573	1.66743	1.64287	2.01345	1.67568	1.53557	1.4668
	GCC	0.607941	0.398588	0.621349	0.413393	0.784286	0.634578	0.70271
	GCG	0.305718	0.368335	0.40903	0.337154	0.300413	0.236403	0.157553
	GCT	1.47061	1.56565	1.32675	1.236	1.23962	1.59345	1.67293
Cys (C)	TGC	0.691972	0.743628	0.668922	0.520511	0.880426	0.937116	0.526016
	TGT	1.30803	1.25637	1.33108	1.47949	1.10044	1.05332	1.47398
Asp (D)	GAC	0.711935	0.71419	1.0488	0.653716	0.959959	0.580693	0.568489
	GAT	1.28807	1.28581	0.9512	1.34628	1.04004	1.41931	1.43151
Glu (E)	GAA	1.25324	1.31506	0.90293	1.34216	1.36434	1.36862	1.39609
	GAG	0.746761	0.684945	1.09707	0.657839	0.63566	0.63138	0.603906
Phe (F)	TTC	0.326355	0.284352	0.325678	0.220452	0.305883	0.200533	0.270368
	TTT	1.67365	1.71565	1.35853	1.77955	1.69412	1.79947	1.72963
Gly (G)	GGA	1.27786	1.45194	1.38403	1.531	1.68173	0.927375	1.06551
	GGC	0.712493	0.671545	1.01199	0.607921	0.623574	0.77931	0.835082
	GGG	0.786743	0.79571	0.746009	0.829303	0.82967	0.709182	0.494871
	GGT	1.2229	1.0808	0.857971	1.03177	0.865029	1.58413	1.60454
His (H)	CAC	0.618962	0.507872	0.537548	0.438097	0.696458	0.543087	0.534081
	CAT	1.38104	1.45385	1.30934	1.5619	1.30354	1.45691	1.46592
Ile (I)	ATA	1.29369	1.22256	0.993375	1.60004	1.25922	1.29232	1.18101
	ATC	0.310609	0.216658	0.338904	0.144731	0.356476	0.208779	0.25309
	ATT	1.39571	1.56078	1.66772	1.25523	1.38431	1.4989	1.5659
Lys (K)	AAA	1.3779	1.2476	0.99378	1.5301	1.50374	1.51286	1.3084
	AAG	0.622098	0.752402	0.824402	0.469896	0.496263	0.487143	0.691598
Leu (L)	CTA	0.724257	0.653348	0.805952	0.859897	0.843562	0.582982	0.611613
	CTC	0.262363	0.111894	0.231577	0.101913	0.34202	0.138447	0.162798
	CTG	0.797001	0.7327	1.35436	0.603406	0.803024	0.393526	0.5362
	CTT	0.890108	0.939022	1.16967	0.579951	1.01844	0.852444	0.709582
	TTA	2.11015	2.0207	1.19898	2.71754	1.87697	2.698	2.69622
	TTG	1.21612	1.54233	1.23947	1.13729	1.11598	1.3346	1.28359
Asn (N)	AAC	0.599502	0.615027	0.698405	0.416826	0.794052	0.426153	0.551228
	AAT	1.4005	1.38497	1.21547	1.58317	1.20595	1.57385	1.44877
Pro (P)	CCA	1.34977	1.44645	1.37664	1.84476	1.30922	1.21502	1.40856
	CCC	0.620177	0.371899	0.535323	0.28046	0.939348	0.580167	0.530658
	CCG	0.29787	0.365559	0.401306	0.460097	0.404433	0.120813	0.171645
	CCT	1.73218	1.79695	1.68673	1.41469	1.347	2.084	1.88914
Gln (Q)	CAA	1.13248	1.10705	1.24706	1.21555	1.29413	1.23184	1.08437
	CAG	0.867519	0.892949	0.743373	0.784446	0.705874	0.76816	0.915629
Arg (R)	AGA	2.38978	2.84396	2.11686	3.22627	2.24894	1.76375	2.18198
	AGG	1.0737	1.07	0.815015	0.951841	0.943519	0.9522	1.11976
	CGA	0.777075	0.581014	1.04615	0.851397	1.37925	0.547896	0.518224
	CGC	0.593336	0.523282	0.732559	0.254368	0.29265	0.934137	0.785846
	CGG	0.441539	0.346965	0.437003	0.302711	0.554006	0.388923	0.372823
	CGT	0.724573	0.634784	0.852417	0.413409	0.58164	1.41309	1.02137
Ser (S)	AGC	0.877066	0.721494	1.10307	0.936509	0.90422	0.623572	0.435328
	AGT	1.45373	1.4293	1.1891	2.04965	1.2015	1.66637	1.44479
	TCA	1.11689	1.12675	1.67933	1.23834	1.13071	1.03536	1.11329
	TCC	0.746832	0.393292	0.735148	0.407003	1.27141	0.669485	0.760126
	TCG	0.282623	0.453426	0.283917	0.229722	0.3481	0.168137	0.174995
	TCT	1.52286	1.87574	0.923314	1.13877	1.14405	1.83708	2.07148
Thr (T)	ACA	1.6304	1.4797	1.46501	2.04021	1.49906	1.79754	1.51944
	ACC	0.71563	0.493397	0.884697	0.345708	1.15482	0.615397	0.68428
	ACG	0.287962	0.383387	0.430538	0.346577	0.282353	0.170261	0.232632
	ACT	1.366	1.64351	1.21975	1.2675	1.06377	1.4168	1.56364
Val (V)	GTA	1.22302	1.32662	0.911848	1.66991	1.20386	1.24311	1.27127
	GTC	0.389234	0.231986	0.531053	0.170808	0.386485	0.386669	0.289882
	GTG	1.09883	1.29863	1.27455	1.07262	1.3013	0.914424	0.966404
	GTT	1.28892	1.14276	1.28255	1.08665	1.10836	1.4558	1.47244
Tyr (Y)	TAC	0.515582	0.454934	0.811643	0.331042	0.463304	0.390685	0.452098
	TAT	1.48442	1.54507	0.862998	1.66896	1.5367	1.60931	1.5479

## Sheet: Table S4
Table S4. Phylogenetic inertia of codon usage bias of surveyed 228 human and macaque papillomaviruses inferred from correspondence analysis.
Amino acid	Codon	6ORF	E6	E7	E1	E2	L2n	L1
Ala (A)	GCA	0.0122528	0.0252814	0.0282517	0.0252342	0.0219719	0.0135543	0.0210757
	GCC	0.016461	0.00752899	0.0135001	0.00712535	0.0148556	0.0135917	0.0225052
	GCG	0.00346521	0.00589389	0.00876203	0.0046794	0.00772047	0.00287382	0.00310155
	GCT	0.0356013	0.0357845	0.0270932	0.0303844	0.0315977	0.0189652	0.0187875
Cys (C)	TGC	0.0124413	0.00562609	0.00479312	0.00982152	0.0358995	0.0575734	0.0109267
	TGT	0.0124413	0.00562609	0.00479312	0.00982152	0.0363454	0.0576224	0.0109267
Asp (D)	GAC	0.00936178	0.00915339	0.00535615	0.00524544	0.00976655	0.00490899	0.00576363
	GAT	0.00936178	0.00915339	0.00535615	0.00524544	0.00976655	0.00490899	0.00576363
Glu (E)	GAA	0.00922967	0.00417452	0.00256988	0.00787961	0.00468907	0.00853229	0.008793
	GAG	0.00922967	0.00417452	0.00256988	0.00787961	0.00468907	0.00853229	0.008793
Phe (F)	TTC	0.00455866	0.00357392	0.0080453	0.00360949	0.0056772	0.00365244	0.00344324
	TTT	0.00455866	0.00357392	0.0177409	0.00360949	0.0056772	0.00365244	0.00344324
Gly (G)	GGA	0.0204041	0.0300905	0.0219479	0.0205422	0.0197923	0.0168799	0.0223815
	GGC	0.015992	0.0183549	0.0165073	0.00959199	0.0118608	0.013171	0.0189425
	GGG	0.0156199	0.0301976	0.0155062	0.0303425	0.0133224	0.00845065	0.0073421
	GGT	0.0158579	0.0302994	0.0178843	0.0236957	0.0131074	0.0138222	0.0166204
His (H)	CAC	0.0135848	0.0109408	0.00984925	0.0122791	0.0129674	0.0109045	0.0111737
	CAT	0.0135848	0.0119924	0.0126703	0.0122791	0.0129674	0.0109045	0.0111737
Ile (I)	ATA	0.00792856	0.015376	0.0142414	0.0195452	0.0201481	0.00895825	0.0135426
	ATC	0.00313951	0.0031977	0.00530099	0.00218138	0.00755593	0.0026406	0.00411371
	ATT	0.00813895	0.0162536	0.0144089	0.0168564	0.0171092	0.00943272	0.0151798
Lys (K)	AAA	0.0102915	0.00433544	0.0148461	0.0056987	0.00564004	0.0124876	0.00866566
	AAG	0.0102915	0.00433544	0.0139394	0.0056987	0.00564004	0.0124876	0.00866566
Leu (L)	CTA	0.00972545	0.00984399	0.00995614	0.0207673	0.0174358	0.0083157	0.00826863
	CTC	0.00323589	0.00139429	0.00248696	0.00157506	0.00922549	0.00522594	0.00371091
	CTG	0.04255	0.0198387	0.0195611	0.0206754	0.0195769	0.0275275	0.0315988
	CTT	0.00969698	0.0138955	0.0125776	0.0095057	0.0213424	0.0133267	0.0124102
	TTA	0.0885078	0.0240682	0.0121273	0.0558545	0.0433971	0.0828058	0.0829135
	TTG	0.00899446	0.0160853	0.0134166	0.0134633	0.0151177	0.0223527	0.0242425
Asn (N)	AAC	0.00862803	0.00918631	0.0119081	0.00434624	0.0130398	0.0104568	0.00578137
	AAT	0.00862803	0.00918631	0.0130042	0.00434624	0.0130398	0.0104568	0.00578137
Pro (P)	CCA	0.0162782	0.0366326	0.0153252	0.0322462	0.0192936	0.0179248	0.0262532
	CCC	0.0221099	0.0142808	0.0108371	0.0112222	0.0182764	0.0138516	0.0192848
	CCG	0.0027117	0.0100228	0.00753796	0.00880702	0.00725838	0.00134888	0.00212327
	CCT	0.0124827	0.0474899	0.0267039	0.0320407	0.0167004	0.013206	0.0150949
Gln (Q)	CAA	0.0106131	0.00751904	0.00659225	0.00798967	0.00866046	0.00969105	0.00835585
	CAG	0.0106131	0.00751904	0.00648187	0.00798967	0.00866046	0.00969105	0.00835585
Arg (R)	AGA	0.131567	0.0402995	0.0574954	0.0842712	0.0646965	0.102329	0.118486
	AGG	0.0219038	0.0225411	0.0307281	0.0352135	0.0258542	0.0172293	0.028233
	CGA	0.0100452	0.0113388	0.0401411	0.0151128	0.0295844	0.0107055	0.0120974
	CGC	0.0180432	0.00962245	0.0212038	0.00670106	0.00795568	0.0255142	0.0334071
	CGG	0.015843	0.00923985	0.0194747	0.0110133	0.0189761	0.0106129	0.017002
	CGT	0.0235249	0.0171253	0.0233036	0.0103407	0.0188824	0.0553486	0.0305907
Ser (S)	AGC	0.0234244	0.0217867	0.0378915	0.0381701	0.0205414	0.015366	0.0104286
	AGT	0.018322	0.0370188	0.0345159	0.0292756	0.0345403	0.0252675	0.0198079
	TCA	0.0139598	0.042314	0.0389001	0.0161793	0.0145956	0.0141189	0.0341171
	TCC	0.0177979	0.0160512	0.0194856	0.0073436	0.0332229	0.0205976	0.0254016
	TCG	0.00255674	0.0150781	0.00873597	0.00391169	0.00554182	0.00321872	0.00376687
	TCT	0.0182728	0.0597763	0.035374	0.0422456	0.0223212	0.0216979	0.0312868
Thr (T)	ACA	0.0125956	0.0302805	0.031132	0.0288546	0.0168449	0.0150833	0.0171562
	ACC	0.0143106	0.0116486	0.0189525	0.00731771	0.0164749	0.013476	0.0165272
	ACG	0.0051276	0.00938239	0.0101792	0.00662459	0.00446615	0.00313402	0.00411014
	ACT	0.0260913	0.0440942	0.0284898	0.0437447	0.0177038	0.0121808	0.0190981
Val (V)	GTA	0.0143734	0.0174387	0.0125217	0.0244604	0.0187596	0.0166649	0.0148523
	GTC	0.0044744	0.00348819	0.00844271	0.00311634	0.00593427	0.00441207	0.00411206
	GTG	0.0449171	0.0254238	0.0178437	0.0337735	0.026008	0.0241227	0.0199023
	GTT	0.0263309	0.0242419	0.0140831	0.0324557	0.0288086	0.0137749	0.0145791
Tyr (Y)	TAC	0.00397304	0.00496422	0.0181621	0.00489926	0.00424763	0.00522799	0.00486907
	TAT	0.00397304	0.00496422	0.0184936	0.00489926	0.00424763	0.00522799	0.00486907

## Sheet: Table S5
Table S5. Dinucleatide suppression in the 228 surveyed human and macaque papillomavirus genes.
Dinucleotide	6ORF	E6	E7	E1	E2	L2n	L1	URR
ApA = TpT	1.03928	1.08267	0.972018	1.05369	1.06822	0.962894	1.03628	1.07698
ApC = GpT	0.979016	0.975175	1.04686	0.933621	1.00519	1.02733	0.973416	1.19594
ApG = CpT	1.02951	1.0748	1.1669	1.01416	1.01792	1.0549	1.00751	0.829846
ApT	0.958665	0.892278	0.830915	0.988278	0.937337	0.9811	0.978818	0.920964
CpA = TpG	1.23833	1.30387	1.34846	1.28498	1.2165	1.20613	1.22406	1.30637
CpC = GpG	1.13545	0.858528	0.862346	1.04489	1.12507	1.20934	1.25008	1.05605
CpG	0.478542	0.538252	0.526428	0.462159	0.575532	0.447093	0.402059	0.728671
GpA = TpC	0.873411	0.871128	0.983786	0.877934	0.919545	0.849971	0.843225	0.660681
GpC	1.07958	1.45527	1.12361	1.30845	0.971784	0.9485	1.01194	1.15548
TpA	0.887494	0.810743	0.734361	0.861482	0.846014	0.993329	0.923864	0.958709

## Sheet: Table S6
Table S6. Phylogenetic inertia of dinucleotide suppression of surveyed 228 human and macaque papillomavirus genes inferred from correspondence analysis.
Dinucleotide	6ORF	E6	E7	E1	E2	L2n	L1
ApA = TpT	0.0317747	0.0361644	0.086059	0.0312002	0.0322861	0.037413	0.0326231
ApC = GpT	0.121998	0.0689881	0.12055	0.0823792	0.192187	0.0787272	0.0609366
ApG = CpT	0.113888	0.0842532	0.0664423	0.0793284	0.113708	0.101166	0.0737359
ApT	0.0385996	0.0611391	0.082173	0.0667633	0.0375572	0.0895984	0.0597572
CpA = TpG	0.0879127	0.0448699	0.096242	0.0376121	0.162013	0.10247	0.0595717
CpC = GpG	0.0682651	0.0959869	0.0667061	0.174153	0.0365579	0.0818039	0.108979
CpG	0.0689902	0.20527	0.088935	0.0986572	0.0573094	0.0897021	0.125137
GpA = TpC	0.289862	0.0514554	0.115064	0.147417	0.216524	0.169472	0.218373
GpC	0.0535518	0.300002	0.15538	0.163338	0.0854316	0.101463	0.148759
TpA	0.125157	0.0518709	0.12245	0.119152	0.0664252	0.148183	0.112128
